# Supplementary material for: Lindera cyclopentenedione intermediates from the roots of Lindera aggregata
Source: Royal Society of Chemistry journal article supplement (doi:10.1039/c8ra03094d), 2018-01-01
Supplement: c8ra03094d1.pdf [file c8ra03094d1.pdf]

# Electronic Supplementary Information

## ***Lindera* cyclopentenedione intermediates from the roots of *Lindera* *aggregate***

Lin Chen<sup>a</sup>, Bo Liu<sup>b</sup>, Jun-Jie Deng<sup>a</sup>, Jun-Sheng Zhang<sup>a</sup>, Wei Li<sup>a</sup>, Abrar Ahmed<sup>a</sup>, Sheng Yin<sup>a</sup>,

Gui-Hua Tang<sup>a,\*</sup>

<sup>a</sup> School of Pharmaceutical Sciences, Sun Yat-sen University, Guangzhou, Guangdong 510006,  
China

<sup>b</sup> The Second Clinical Medical College, Guangzhou University of Chinese Medicine, Guangzhou  
510006, China

\*Corresponding author.

*E-mail addresses:* tanggh5@mail.sysu.edu.cn

**Contents:**

**S1. Tables**.....p4–6

|                                                                                                                                                          |
|----------------------------------------------------------------------------------------------------------------------------------------------------------|
| <b>Table S1.1.</b> The $^1\text{H}$ NMR (400 MHz) and $^{13}\text{C}$ NMR (100 MHz) data of <b>5</b> in $\text{CDCl}_3$ ( $\delta$ in ppm).              |
| <b>Table S1.2.</b> The $^1\text{H}$ NMR (400 MHz) and $^{13}\text{C}$ NMR (100 MHz) data of <b>6</b> in $\text{CDCl}_3$ ( $\delta$ in ppm).              |
| <b>Table S1.3.</b> The $^1\text{H}$ NMR (400 MHz) and $^{13}\text{C}$ NMR (100 MHz) data of <b>7</b> in $\text{CDCl}_3$ ( $\delta$ in ppm).              |
| <b>Table S1.4.</b> The $^1\text{H}$ (400 MHz) and $^{13}\text{C}$ (100 MHz) NMR data of <b>8</b> and <b>9a/9b</b> in $\text{CDCl}_3$ ( $\delta$ in ppm). |

**S2. NMR spectra of compounds 1–7**.....p7–38

|                                                                              |                                                                                              |
|------------------------------------------------------------------------------|----------------------------------------------------------------------------------------------|
| in $\text{CD}_3\text{OD}$                                                    |                                                                                              |
| <b>S2.1.</b> $^1\text{H}$ NMR spectrum of compound <b>1</b>                  | <b>S2.2.</b> $^{13}\text{C}$ NMR and DEPT spectra of compound <b>1</b>                       |
| <b>S2.3.</b> HSQC spectrum of compound <b>1</b>                              | <b>S2.4.</b> $^1\text{H}$ – $^1\text{H}$ COSY spectrum of compound <b>1</b>                  |
| <b>S2.5.</b> HMBC spectrum of compound <b>1</b>                              | <b>S2.6.</b> NOESY spectrum of compound <b>1</b>                                             |
| in $\text{CDCl}_3$                                                           |                                                                                              |
| <b>S2.7.</b> $^1\text{H}$ NMR spectrum of compound <b>2</b>                  | <b>S2.8.</b> $^{13}\text{C}$ NMR and DEPT spectra of compound <b>2</b>                       |
| <b>S2.9.</b> HSQC spectrum of compound <b>2</b>                              | <b>S2.10.</b> $^1\text{H}$ – $^1\text{H}$ COSY spectrum of compound <b>2</b>                 |
| <b>S2.11.</b> HMBC spectrum of compound <b>2</b>                             | <b>S2.12.</b> $^1\text{H}$ NMR spectrum of compound <b>3</b>                                 |
| <b>S2.13.</b> $^{13}\text{C}$ NMR and DEPT spectra of compound <b>3</b>      | <b>S2.14.</b> HSQC spectrum of compound <b>3</b>                                             |
| <b>S2.15.</b> $^1\text{H}$ – $^1\text{H}$ COSY spectrum of compound <b>3</b> | <b>S2.16.</b> HMBC spectrum of compound <b>3</b>                                             |
| <b>S2.17.</b> $^1\text{H}$ NMR spectrum of compounds <b>4a</b> and <b>4b</b> | <b>S2.18.</b> $^{13}\text{C}$ NMR and DEPT spectra of compounds <b>4a</b> and <b>4b</b>      |
| <b>S2.19.</b> HSQC spectrum of compounds <b>4a</b> and <b>4b</b>             | <b>S2.20.</b> $^1\text{H}$ – $^1\text{H}$ COSY spectrum of compounds <b>4a</b> and <b>4b</b> |
| <b>S2.21.</b> HMBC spectrum of compounds <b>4a</b> and <b>4b</b>             | <b>S2.22.</b> NOESY spectrum of compounds <b>4a</b> and <b>4b</b>                            |
| <b>S2.23.</b> $^1\text{H}$ NMR spectrum of compound <b>5</b>                 | <b>S2.24.</b> $^{13}\text{C}$ NMR and DEPT spectra of compound <b>5</b>                      |
| <b>S2.25.</b> $^1\text{H}$ NMR spectrum of compound <b>6</b>                 | <b>S2.26.</b> $^{13}\text{C}$ NMR and DEPT spectra of compound <b>6</b>                      |

|                                                                                |                                                                                         |
|--------------------------------------------------------------------------------|-----------------------------------------------------------------------------------------|
| <b>S2.27.</b> <sup>1</sup> H NMR spectrum of compound <b>7</b>                 | <b>S2.28.</b> <sup>13</sup> C NMR and DEPT spectra of compound <b>7</b>                 |
| <b>S2.29.</b> <sup>1</sup> H NMR spectrum of compound <b>8</b>                 | <b>S2.30.</b> <sup>13</sup> C NMR and DEPT spectra of compound <b>8</b>                 |
| <b>S2.31.</b> <sup>1</sup> H NMR spectrum of compounds <b>9a</b> and <b>9b</b> | <b>S2.32.</b> <sup>13</sup> C NMR and DEPT spectra of compounds <b>9a</b> and <b>9b</b> |

**S3.** MS, HR-ESI-MS, and IR spectra of new compounds **1–4**.....p39–46

|                                                           |                                                                           |
|-----------------------------------------------------------|---------------------------------------------------------------------------|
| <b>S3.1.</b> MS data of compound <b>1</b>                 | <b>S3.2.</b> HR-ESI-MS data of compound <b>1</b>                          |
| <b>S3.3.</b> MS data of compound <b>2</b>                 | <b>S3.4.</b> HR-ESI-MS data of compound <b>2</b>                          |
| <b>S3.5.</b> MS data of compound <b>3</b>                 | <b>S3.6.</b> HR-ESI-MS data of compound <b>3</b>                          |
| <b>S3.7.</b> MS data of compounds <b>4a</b> and <b>4b</b> | <b>S3.8.</b> HR-ESI-MS data of compounds <b>4a</b> and <b>4b</b>          |
| <b>S3.9.</b> IR (KBr disc) spectrum of compound <b>1</b>  | <b>S3.10.</b> IR (KBr disc) spectrum of compound <b>2</b>                 |
| <b>S3.11.</b> IR (KBr disc) spectrum of compound <b>3</b> | <b>S3.12.</b> IR (KBr disc) spectrum of compounds <b>4a</b> and <b>4b</b> |

**S4.** ECD computational details.....p47–49

**Table S1.1.** The  $^1\text{H}$  (400 MHz) and  $^{13}\text{C}$  (100 MHz) NMR data of **5** in  $\text{CDCl}_3$  ( $\delta$  in ppm)

| position         | $\delta_{\text{H}}$ , multi ( $J$ in Hz) | $\delta_{\text{C}}$ , type                                | position              | $\delta_{\text{H}}$ , multi ( $J$ in Hz) | $\delta_{\text{C}}$ , type                                |
|------------------|------------------------------------------|-----------------------------------------------------------|-----------------------|------------------------------------------|-----------------------------------------------------------|
| 1                |                                          | 155.2, C                                                  | 1'                    |                                          | 173.2, C                                                  |
| 2                | 4.83 d (5.1)                             | 95.6, CH                                                  | 2'                    | 5.89, d (11.6)                           | 43.9, CH                                                  |
| 3                | 3.66, d (5.1)                            | 47.3, CH                                                  | 3'                    | 3.82, d (11.6)                           | 43.1, CH                                                  |
| 4                |                                          | 56.9, C                                                   | 4'                    |                                          | 111.1, C                                                  |
| 5, 8             |                                          | 195.7 and 193.5, each<br>C                                | 5', 8'                |                                          | 186.5 and 183.9, each<br>C                                |
| 6, 7             |                                          | 151.6 and 150.7, each<br>C                                | 6', 7'                |                                          | 147.9 and 146.8, each<br>C                                |
| 9                |                                          | 141.5, C                                                  | 9'                    |                                          | 136.5, C                                                  |
| 10/14, 11/13, 12 | 6.99–7.36, m, overlapped                 | 129.7 $\times$ 2, 128.2 $\times$ 2,<br>and 127.6, each CH | 10'/14', 11'/13', 12' | 6.99–7.36, m,<br>overlapped              | 129.7 $\times$ 2, 127.8 $\times$ 2,<br>and 127.4, each CH |
| 1-OMe            | 3.58, s                                  | 55.0, $\text{CH}_3$                                       | 1'-OMe                | 4.10, s                                  | 65.9, $\text{CH}_3$                                       |
| 6-, 7-OMe        | 4.14 and 3.73, each s                    | 59.66 and 59.74, each<br>$\text{CH}_3$                    | 6'-, 7'-OMe           | 4.08 and 4.04, each s                    | 60.0 and 59.66, each<br>$\text{CH}_3$                     |



**Table S1.2.** The  $^1\text{H}$  (400 MHz) and  $^{13}\text{C}$  (100 MHz) NMR data of **6** in  $\text{CDCl}_3$  ( $\delta$  in ppm)

| position         | $\delta_{\text{H}}$ , multi ( $J$ in Hz) | $\delta_{\text{C}}$ , type                             | position              | $\delta_{\text{H}}$ , multi ( $J$ in Hz) | $\delta_{\text{C}}$ , type                             |
|------------------|------------------------------------------|--------------------------------------------------------|-----------------------|------------------------------------------|--------------------------------------------------------|
| 1                |                                          | 154.9, C                                               | 1'                    |                                          | 172.8, C                                               |
| 2                | 4.84, br s                               | 96.6, CH                                               | 2'                    | 6.14, d (11.3)                           | 43.4, CH                                               |
| 3                | 4.32, br s                               | 46.1, CH                                               | 3'                    | 3.88, d (11.3)                           | 48.5, CH                                               |
| 4                |                                          | 59.1, C                                                | 4'                    |                                          | 111.2, C                                               |
| 5, 8             |                                          | 196.2 and 194.8, each C                                | 5', 8'                |                                          | 186.8 and 184.1, each C                                |
| 6, 7             |                                          | 153.7 and 153.0, each C                                | 6', 7'                |                                          | 147.9 and 147.0, each C                                |
| 9                |                                          | 140.3, C                                               | 9'                    |                                          | 136.4, C                                               |
| 10/14, 11/13, 12 | 7.04–7.22, m, overlapped                 | 129.2 $\times$ 2, 128.4 $\times$ 2, and 127.7, each CH | 10'/14', 11'/13', 12' | 7.04–7.22, m, overlapped                 | 129.2 $\times$ 2, 128.2 $\times$ 2, and 127.6, each CH |
| 1-OMe            | 3.59, s                                  | 55.0, $\text{CH}_3$                                    | 1'-OMe                | 4.00, s                                  | 65.2, $\text{CH}_3$                                    |
| 6-, 7-OMe        | 3.76 and 3.61, each s                    | 59.4 and 59.6, each $\text{CH}_3$                      | 6'-, 7'-OMe           | 4.12 and 4.05, each s                    | 59.7 and 60.1, each $\text{CH}_3$                      |

**Table S1.3.** The  $^1\text{H}$  (400 MHz) and  $^{13}\text{C}$  (100 MHz) NMR data of **7** in  $\text{CDCl}_3$  ( $\delta$  in ppm)

| position                                  | $\delta_{\text{H}}$ , multi ( $J$ in Hz) | $\delta_{\text{C}}$ , type                             |
|-------------------------------------------|------------------------------------------|--------------------------------------------------------|
| 1/1'                                      |                                          | 153.4, C                                               |
| 2/2'                                      | 5.43, d (10.3)                           | 102.4, CH                                              |
| 3/3'                                      | 5.55, d (10.3)                           | 43.4, CH                                               |
| 4/4'                                      |                                          | 66.8, C                                                |
| 5/5', 8/8'                                |                                          | 194.9 and 192.4, each C                                |
| 6/6', 7/7'                                |                                          | 154.1 and 152.0, each C                                |
| 9/9'                                      |                                          | 138.2, C                                               |
| 10(10')/14(14'), 11(11')/13(13'), 12(12') | 7.23–7.29, m, overlapped                 | 129.8 $\times$ 2, 128.6 $\times$ 2, and 127.9, each CH |
| 1/1'-OMe                                  | 3.50, s                                  | 55.6, $\text{CH}_3$                                    |
| 6/6'-, 7/7'-OMe                           | 3.95 and 3.89, each s                    | 59.68 and 59.65, each $\text{CH}_3$                    |

**Table S1.4.** The  $^1\text{H}$  (400 MHz) and  $^{13}\text{C}$  (100 MHz) NMR data of **6a**, **6b**, and **7** in  $\text{CDCl}_3$  ( $\delta$  in ppm).

| position | <b>8</b>                                 |                            | <b>9a</b>                                |                            | <b>9b</b>                                |                            |
|----------|------------------------------------------|----------------------------|------------------------------------------|----------------------------|------------------------------------------|----------------------------|
|          | $\delta_{\text{H}}$ , multi ( $J$ in Hz) | $\delta_{\text{C}}$ , type | $\delta_{\text{H}}$ , multi ( $J$ in Hz) | $\delta_{\text{C}}$ , type | $\delta_{\text{H}}$ , multi ( $J$ in Hz) | $\delta_{\text{C}}$ , type |
| 1        |                                          | 186.9, C                   |                                          | 191.8, C                   |                                          | 189.7, C                   |
| 2        |                                          | 109.3, C                   |                                          | 109.4, C                   |                                          | 109.7, C                   |
| 3        |                                          | 184.4, C                   |                                          | 185.5, C                   |                                          | 188.4, C                   |
| 4        |                                          | 147.6, C                   |                                          | 170.2, C                   |                                          | 169.9, C                   |
| 5        |                                          | 148.8, C                   | 5.94, s                                  | 111.9, CH                  | 5.93, s                                  | 112.2, CH                  |
| 6        |                                          | 165.1, C                   |                                          | 168.9, C                   |                                          | 169.1, C                   |
| 7        | 7.37, d (15.8)                           | 121.1, CH                  | 7.61, d (15.8)                           | 121.6, CH                  | 7.60, d (15.8)                           | 121.2, CH                  |
| 8        | 7.81, d (15.8)                           | 140.9, CH                  | 8.00, d (15.8)                           | 142.8, CH                  | 7.92, d (15.8)                           | 143.0, CH                  |
| 9        |                                          | 135.4, C                   |                                          | 135.6, C                   |                                          | 135.4, C                   |
| 10/14    | 7.46, dd, (7.8, 1.8)                     | 128.7, CH                  | 7.38, m, overlapped                      | 129.04, CH                 | 7.38, m, overlapped                      | 129.07, CH                 |
| 11/13    | 7.23, m, overlapped                      | 128.1, CH                  | 7.38, m, overlapped                      | 128.7, CH                  | 7.38, m, overlapped                      | 128.7, CH                  |
| 12       | 7.23, m, overlapped                      | 129.8, CH                  | 7.38, m, overlapped                      | 130.47, CH                 | 7.38, m, overlapped                      | 130.50, CH                 |
| 4-OMe    | 3.05, s                                  | 59.7, $\text{CH}_3$        | 3.93, s                                  | 58.7, $\text{CH}_3$        | 3.92, s                                  | 58.6, $\text{CH}_3$        |
| 5-OMe    | 4.04, s                                  | 59.6, $\text{CH}_3$        |                                          |                            |                                          |                            |
| 6-OMe    | 3.97, s                                  | 64.1, $\text{CH}_3$        | 4.19, s                                  | 64.7, $\text{CH}_3$        | 4.21, s                                  | 65.1, $\text{CH}_3$        |

## S2.1. <sup>1</sup>H NMR spectrum of compound 1

7

7.4481  
7.4294  
7.3714  
7.3530  
7.3338  
7.2923  
7.2743  
7.2562

6.8935  
6.8533

6.3506  
6.3104

4.8694

4.2632

3.8051

3.5901

3.3950  
3.3602  
3.3557  
3.3514

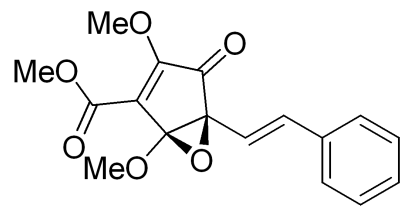

1

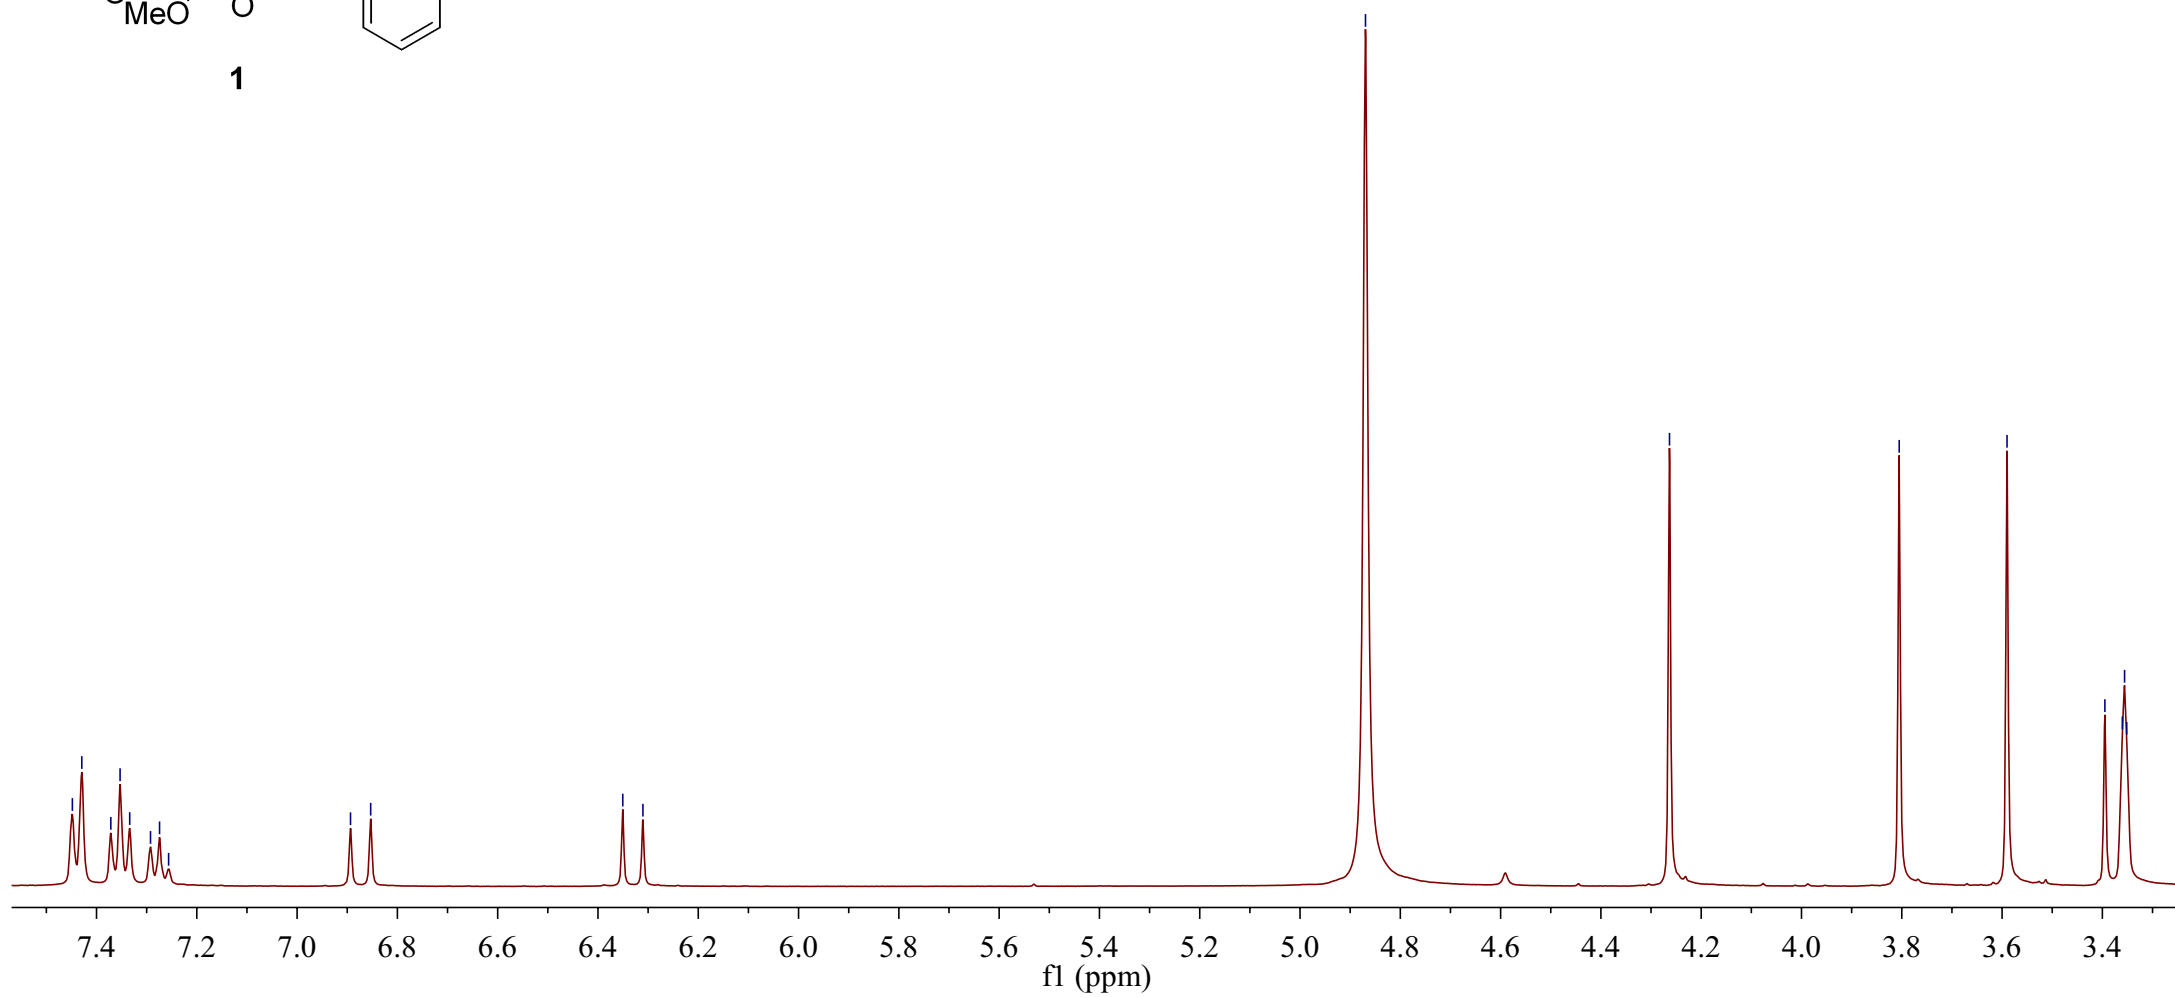

## S2.2. $^{13}\text{C}$ NMR and DEPT spectra of compound 1

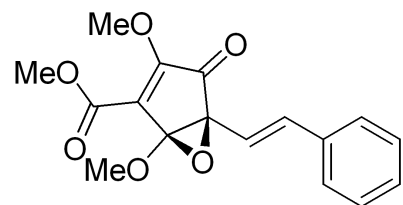**1**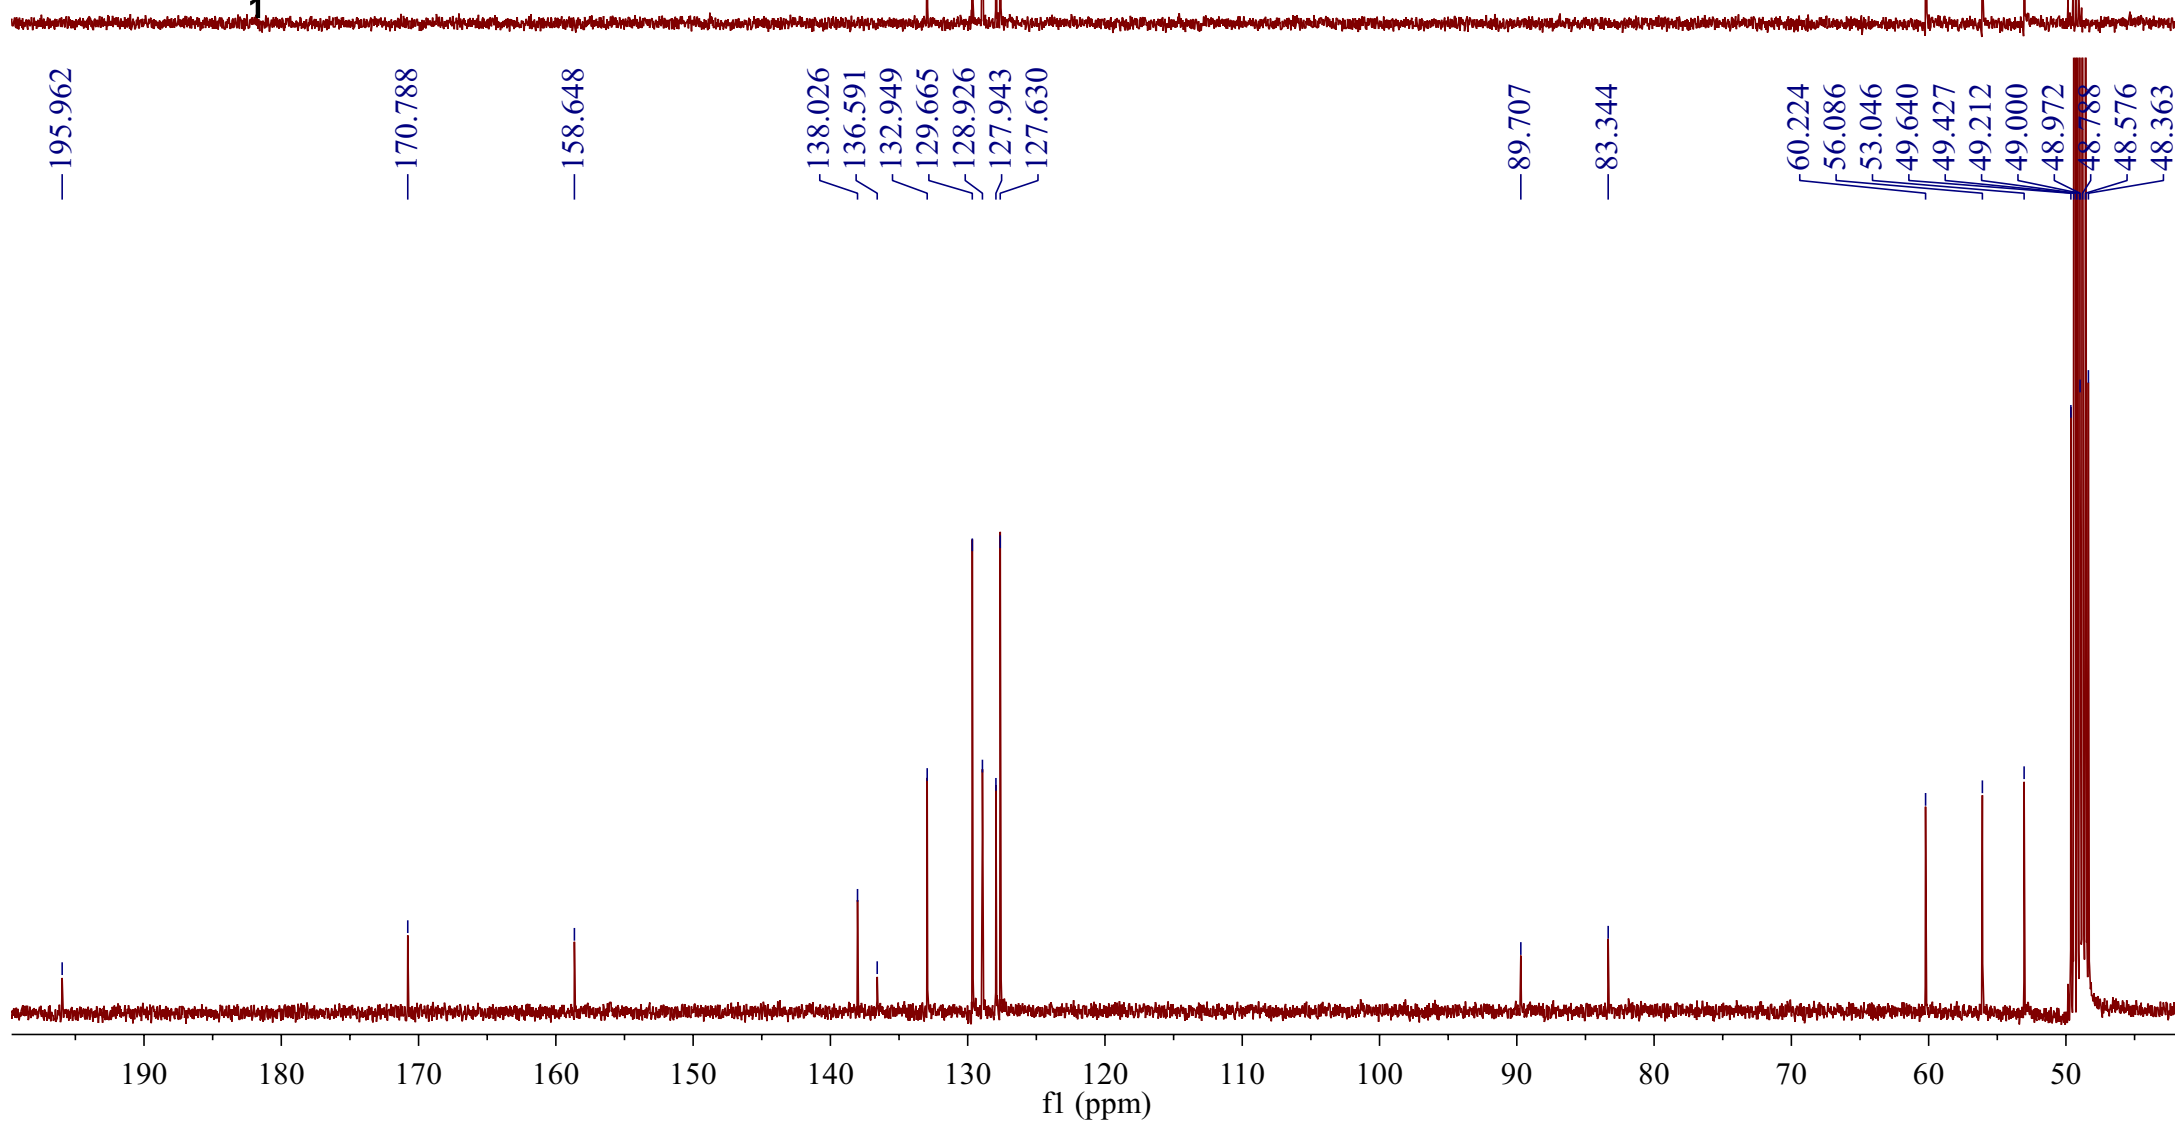

### S2.3. HSQC spectrum of compound 1

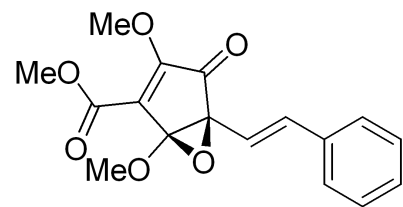**1**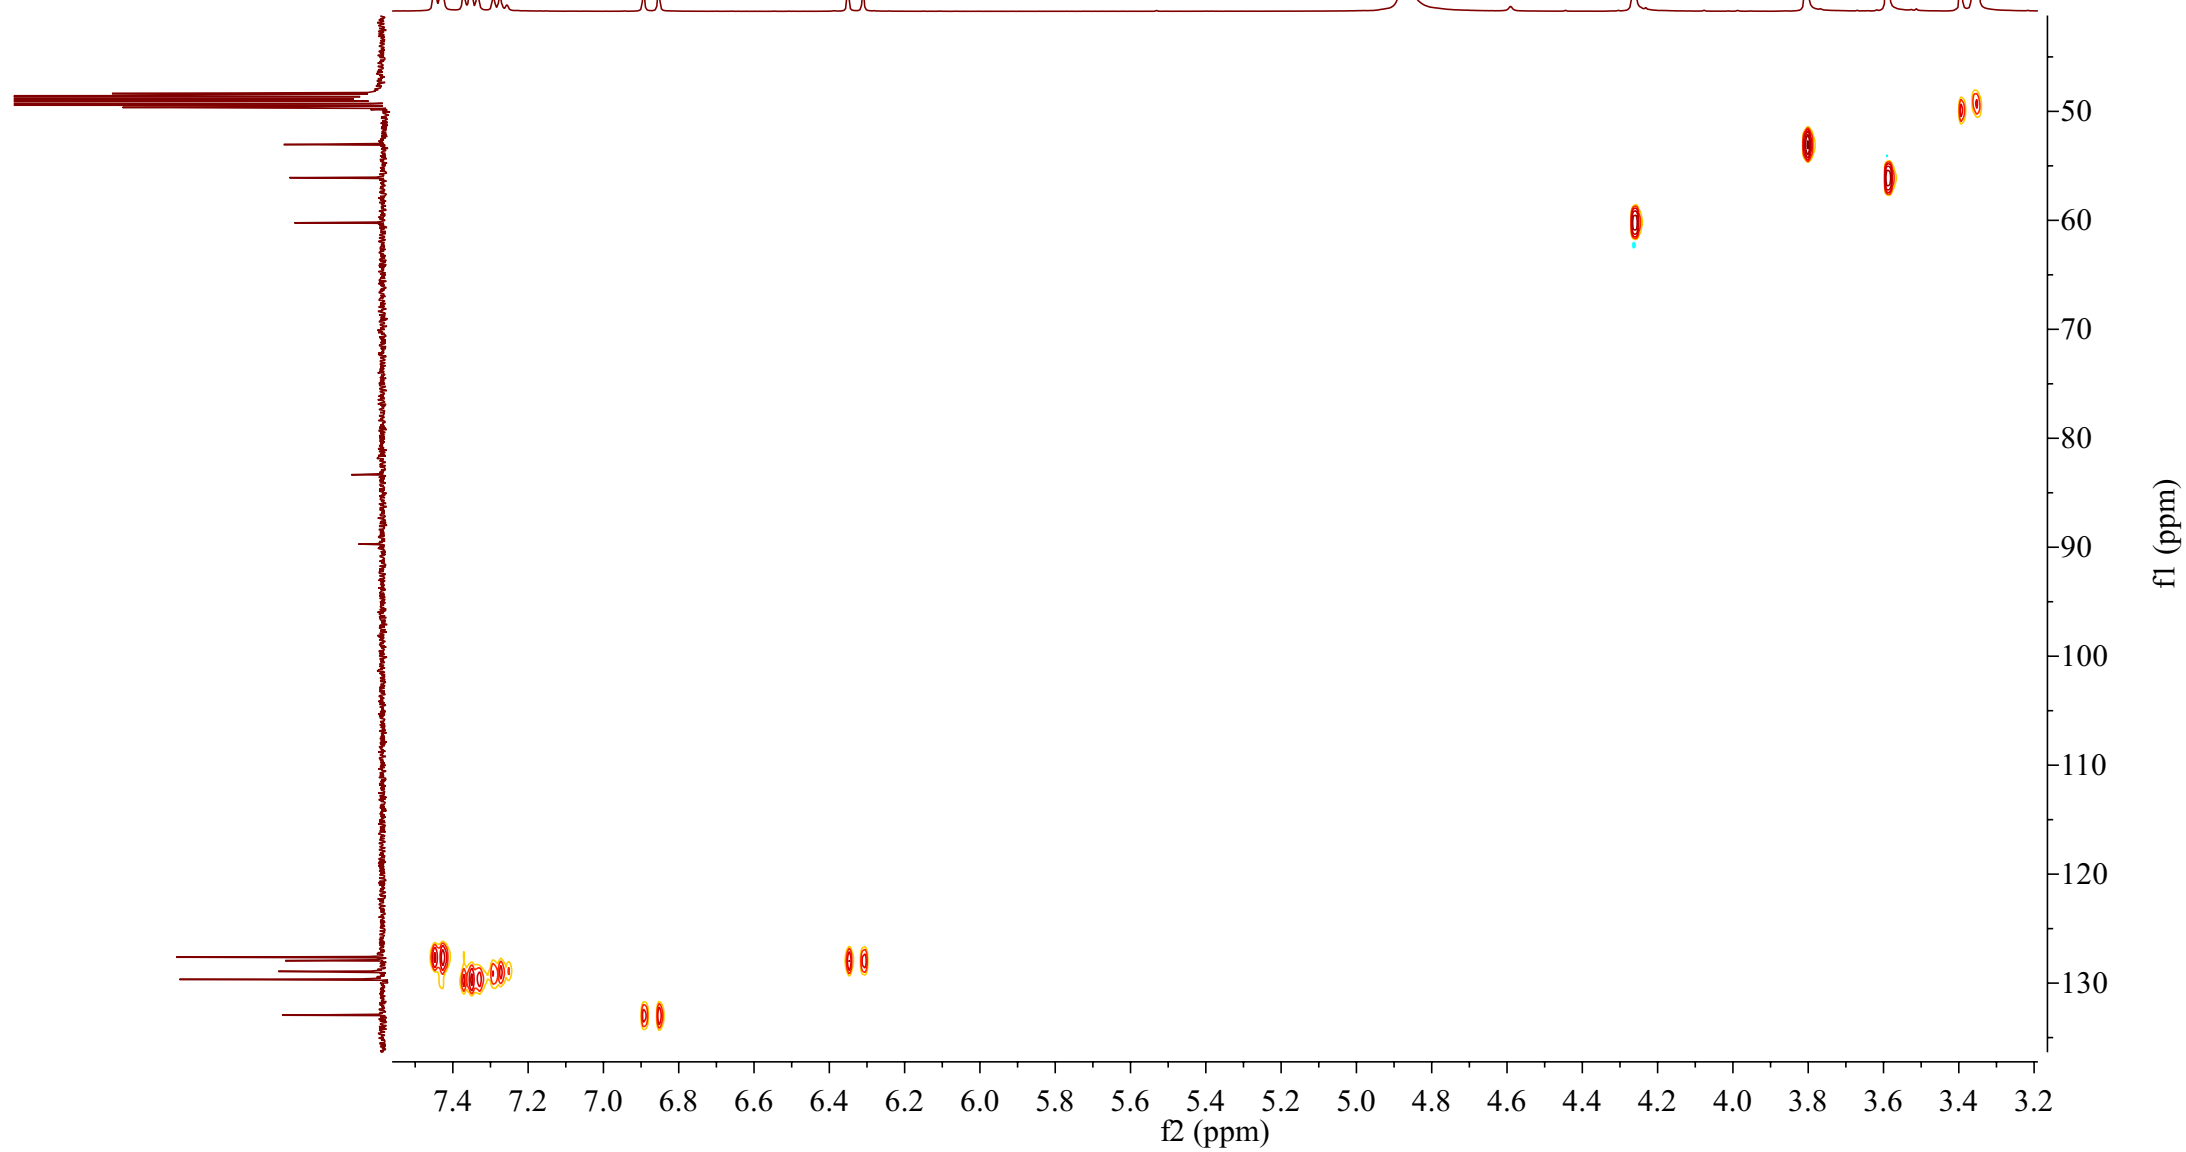

S2.4.  $^1\text{H}$ - $^1\text{H}$  COSY spectrum of compound **1**

10

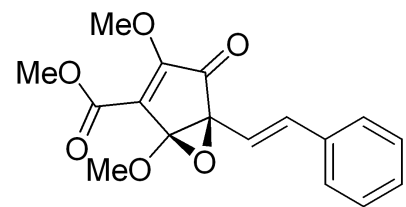

**1**

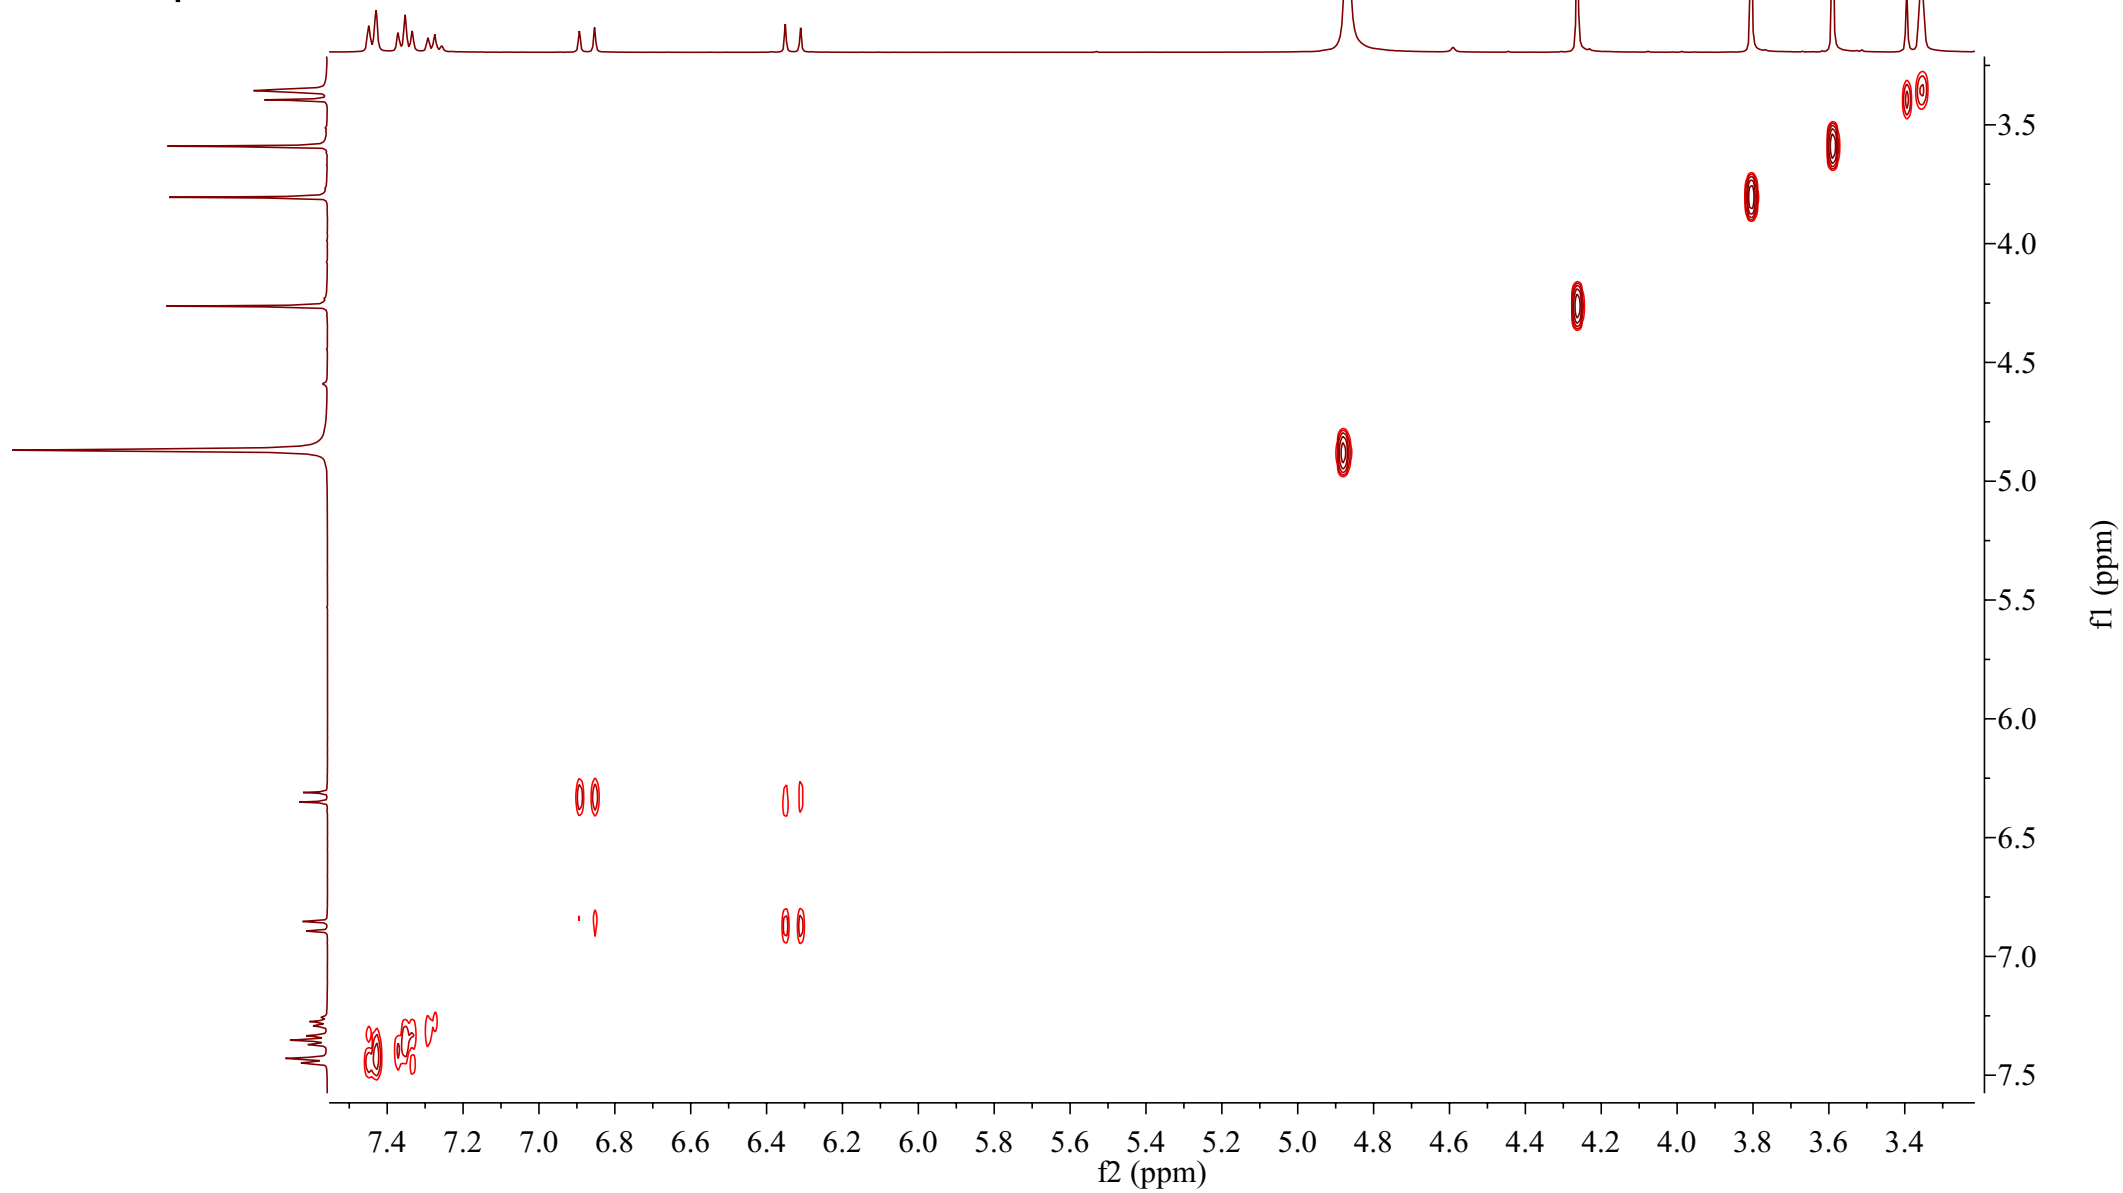

S2.5. HMBC spectrum of compound 1

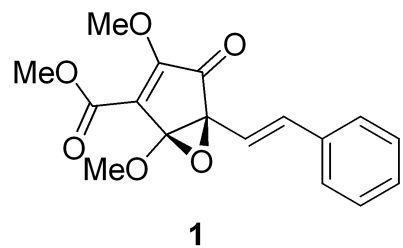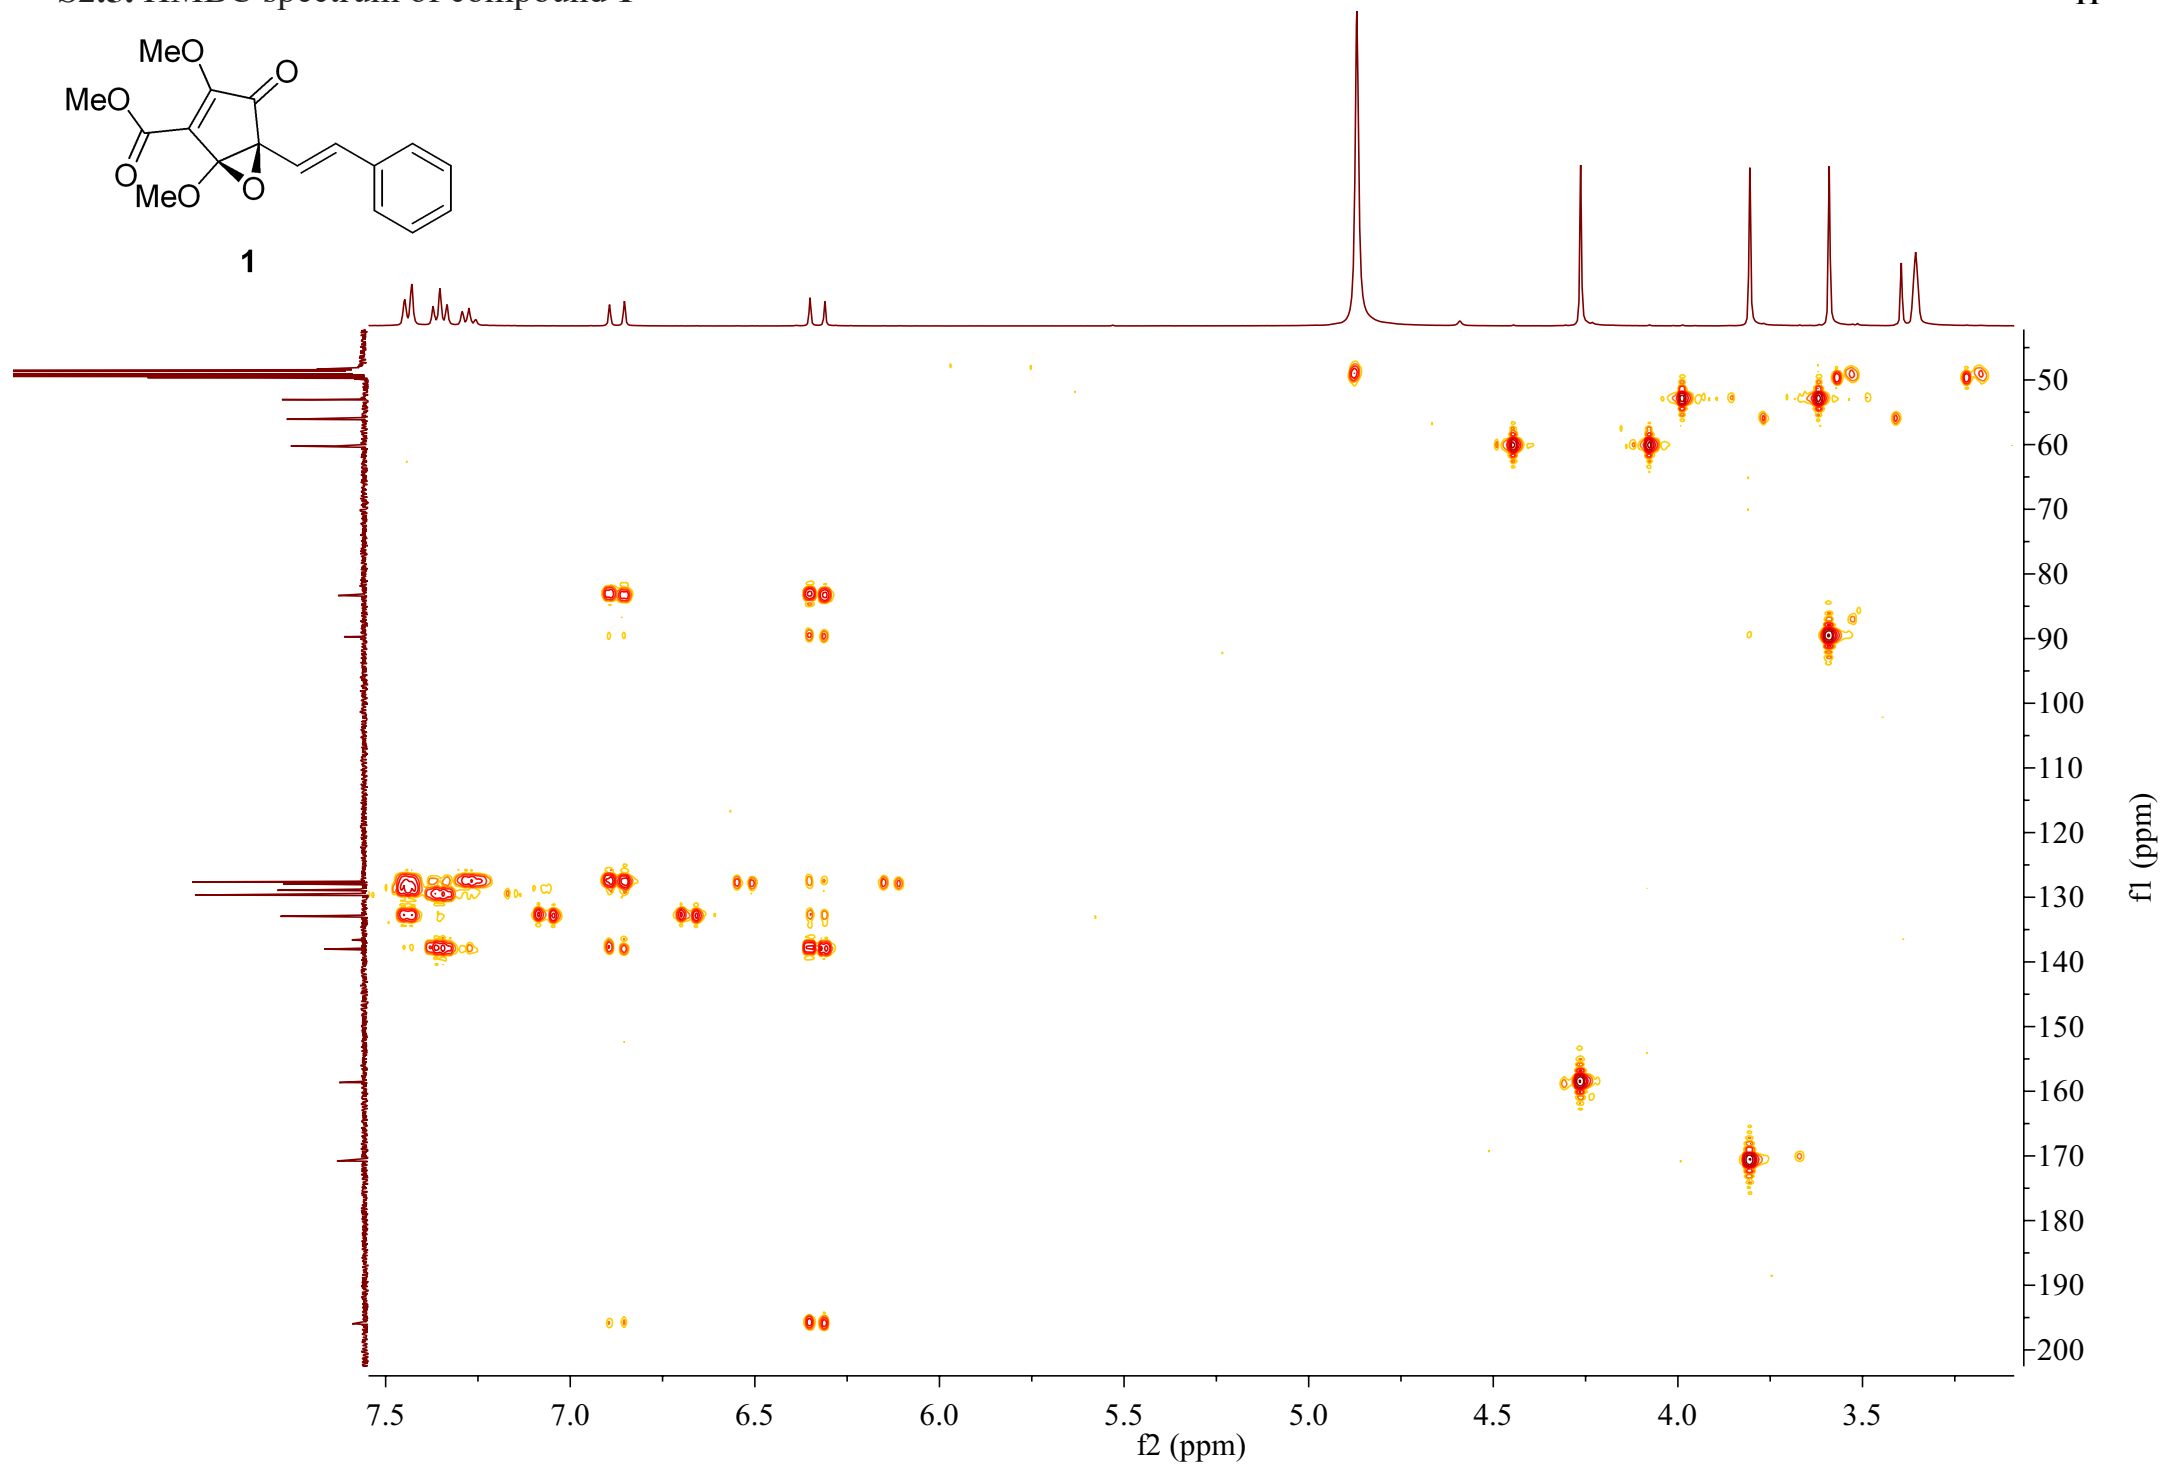

## S2.6. NOESY spectrum of compound 1

12

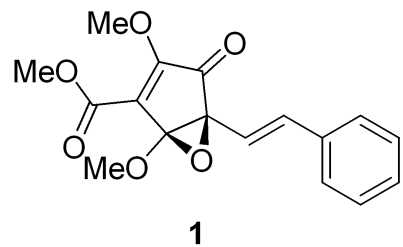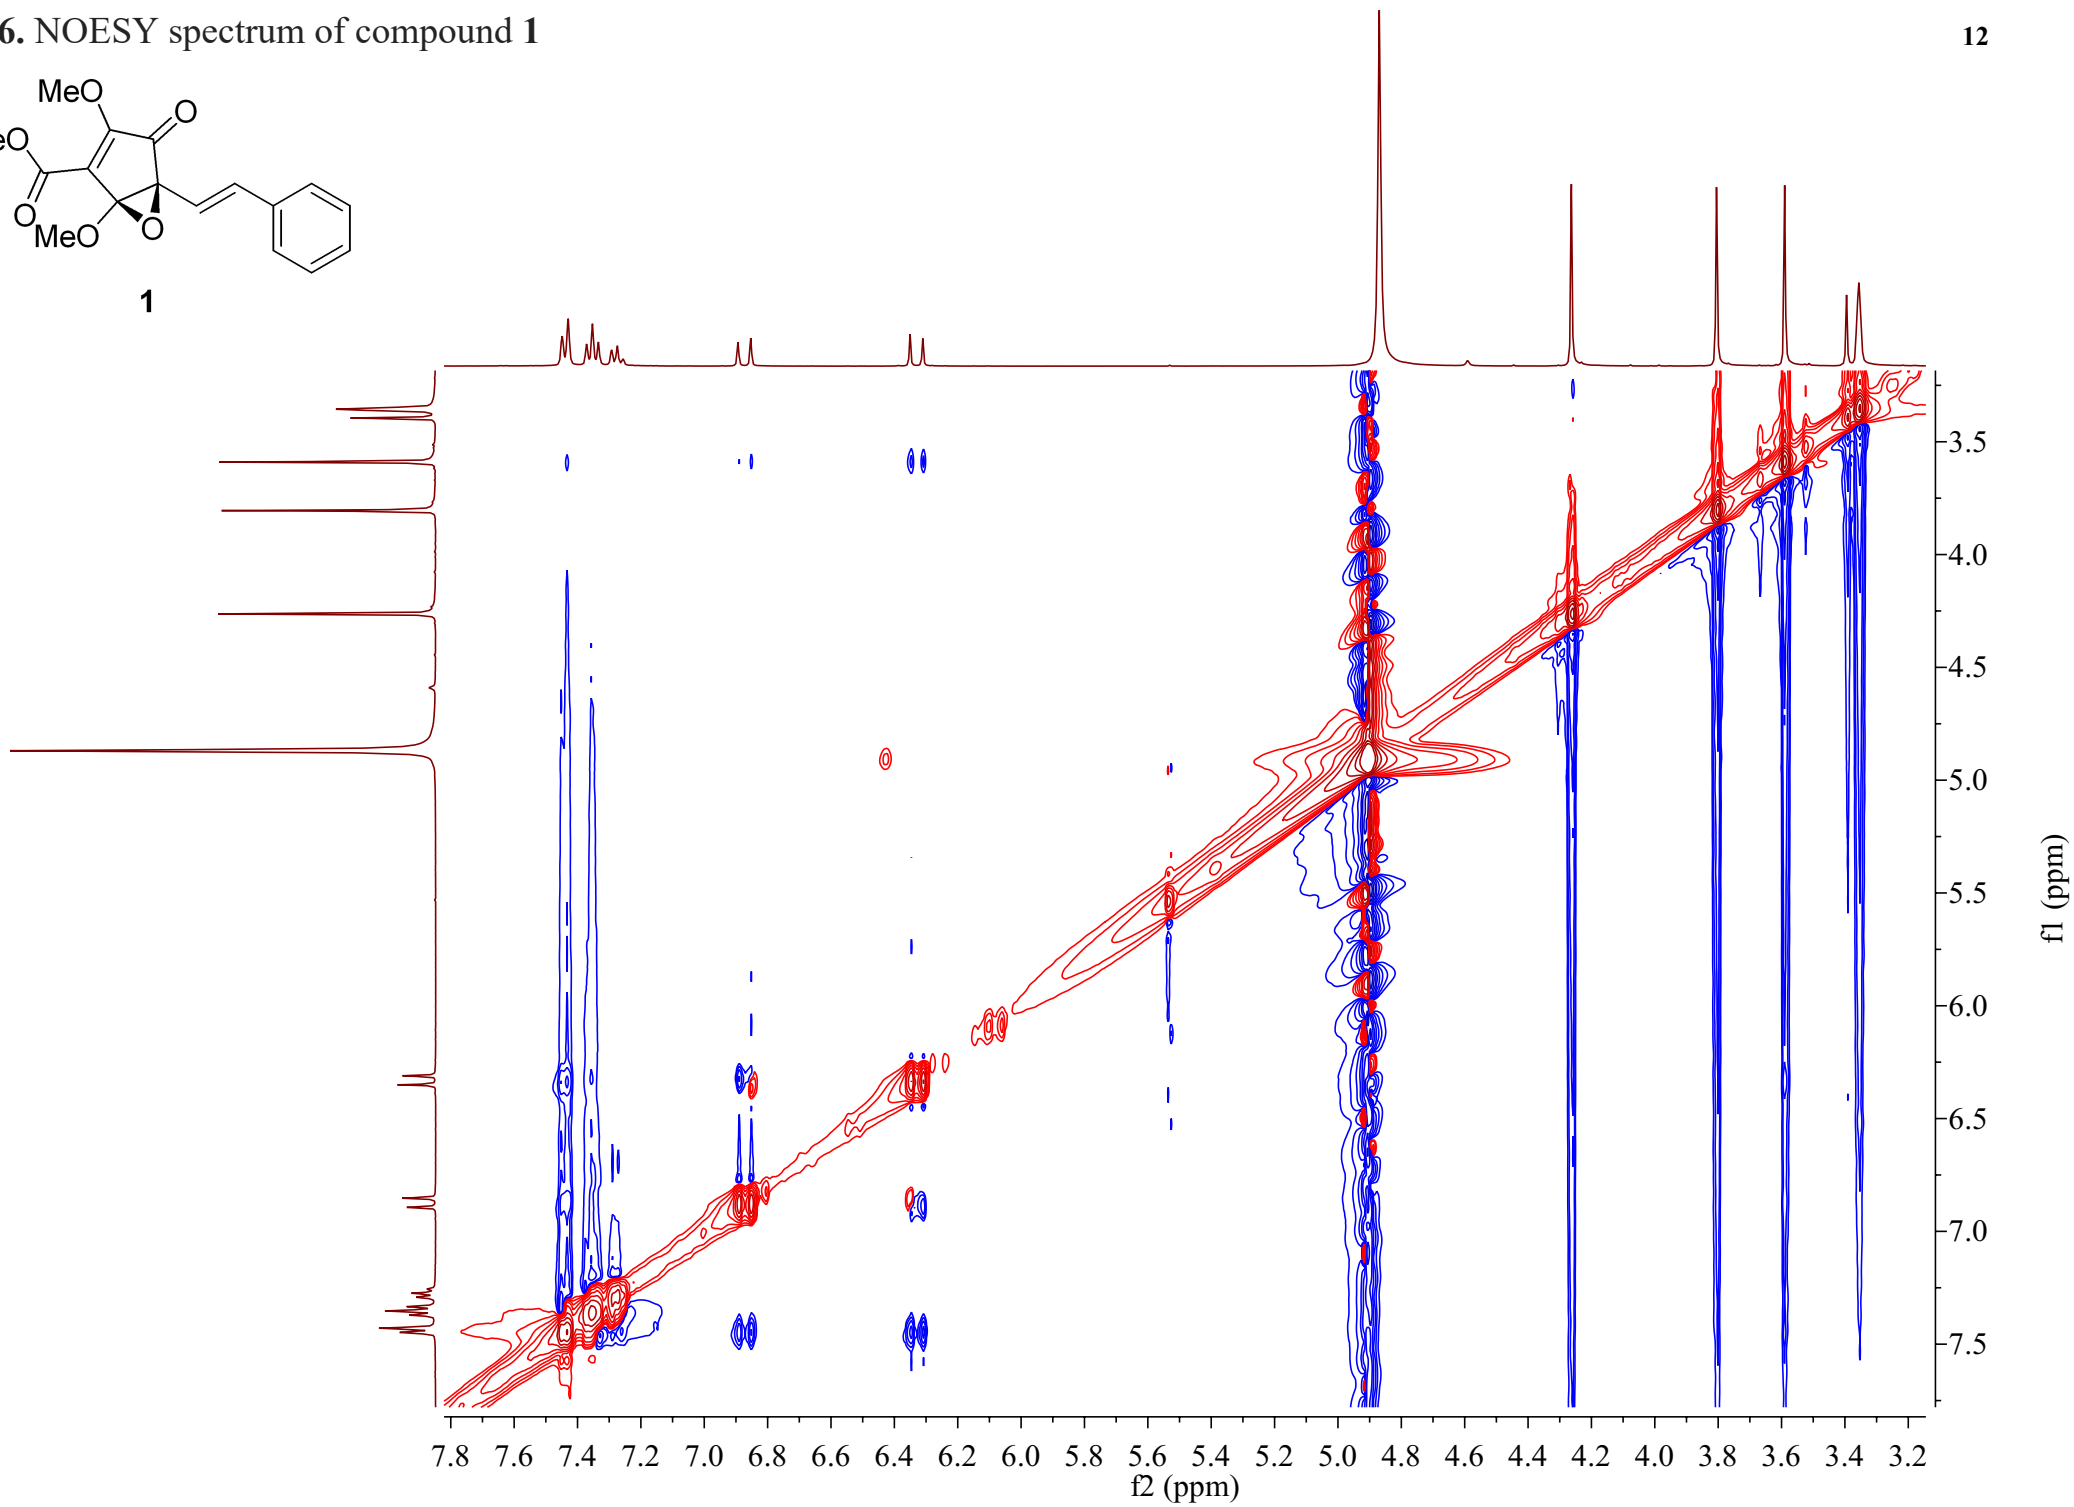



S2.7. <sup>1</sup>H NMR spectrum of compound 2

7.5806  
7.5742  
7.5690  
7.5544  
7.5506  
7.5409  
7.4341  
7.4259  
7.4207  
7.4133  
7.4114  
7.4079  
7.4005  
7.3993  
7.3944  
7.3904  
7.3881  
7.3816  
7.3779  
7.2603  
7.0481  
7.0423  
6.7426  
6.7023  
6.3754  
6.3697

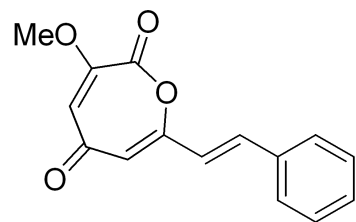

2

4.0018

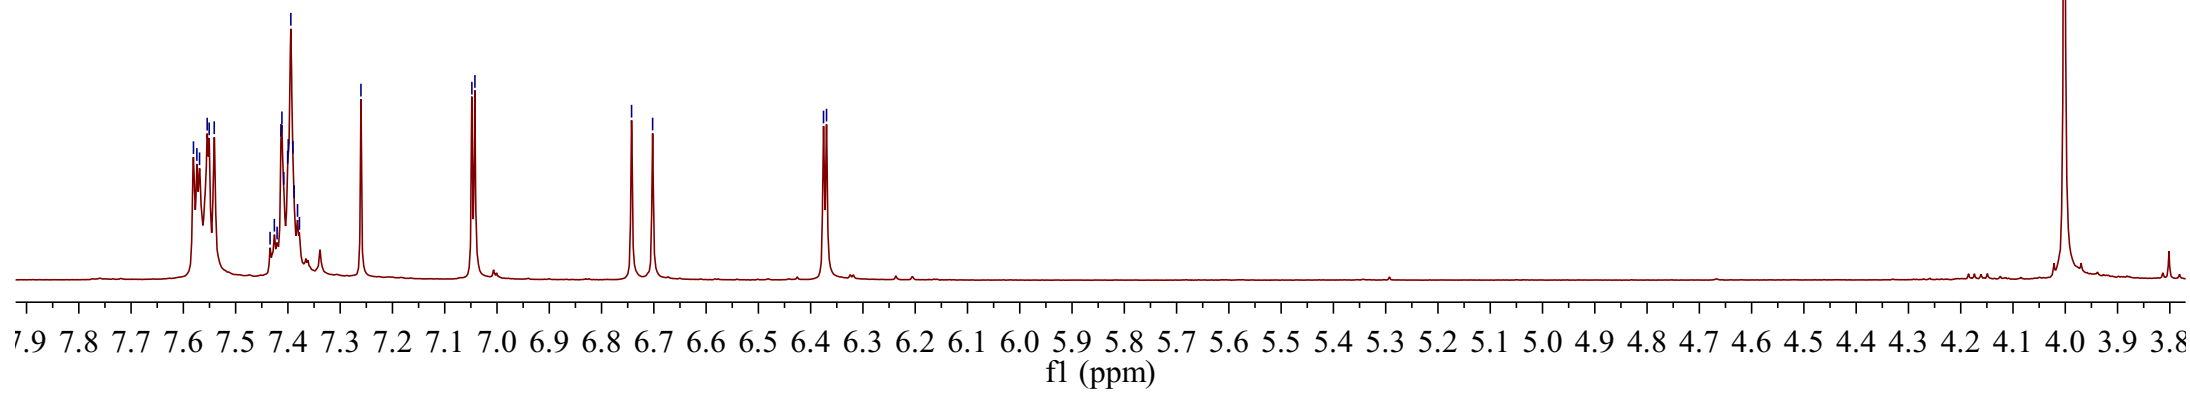

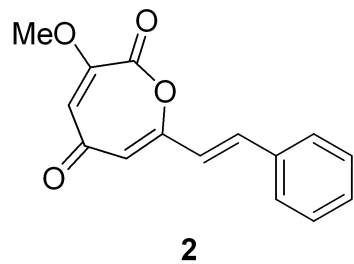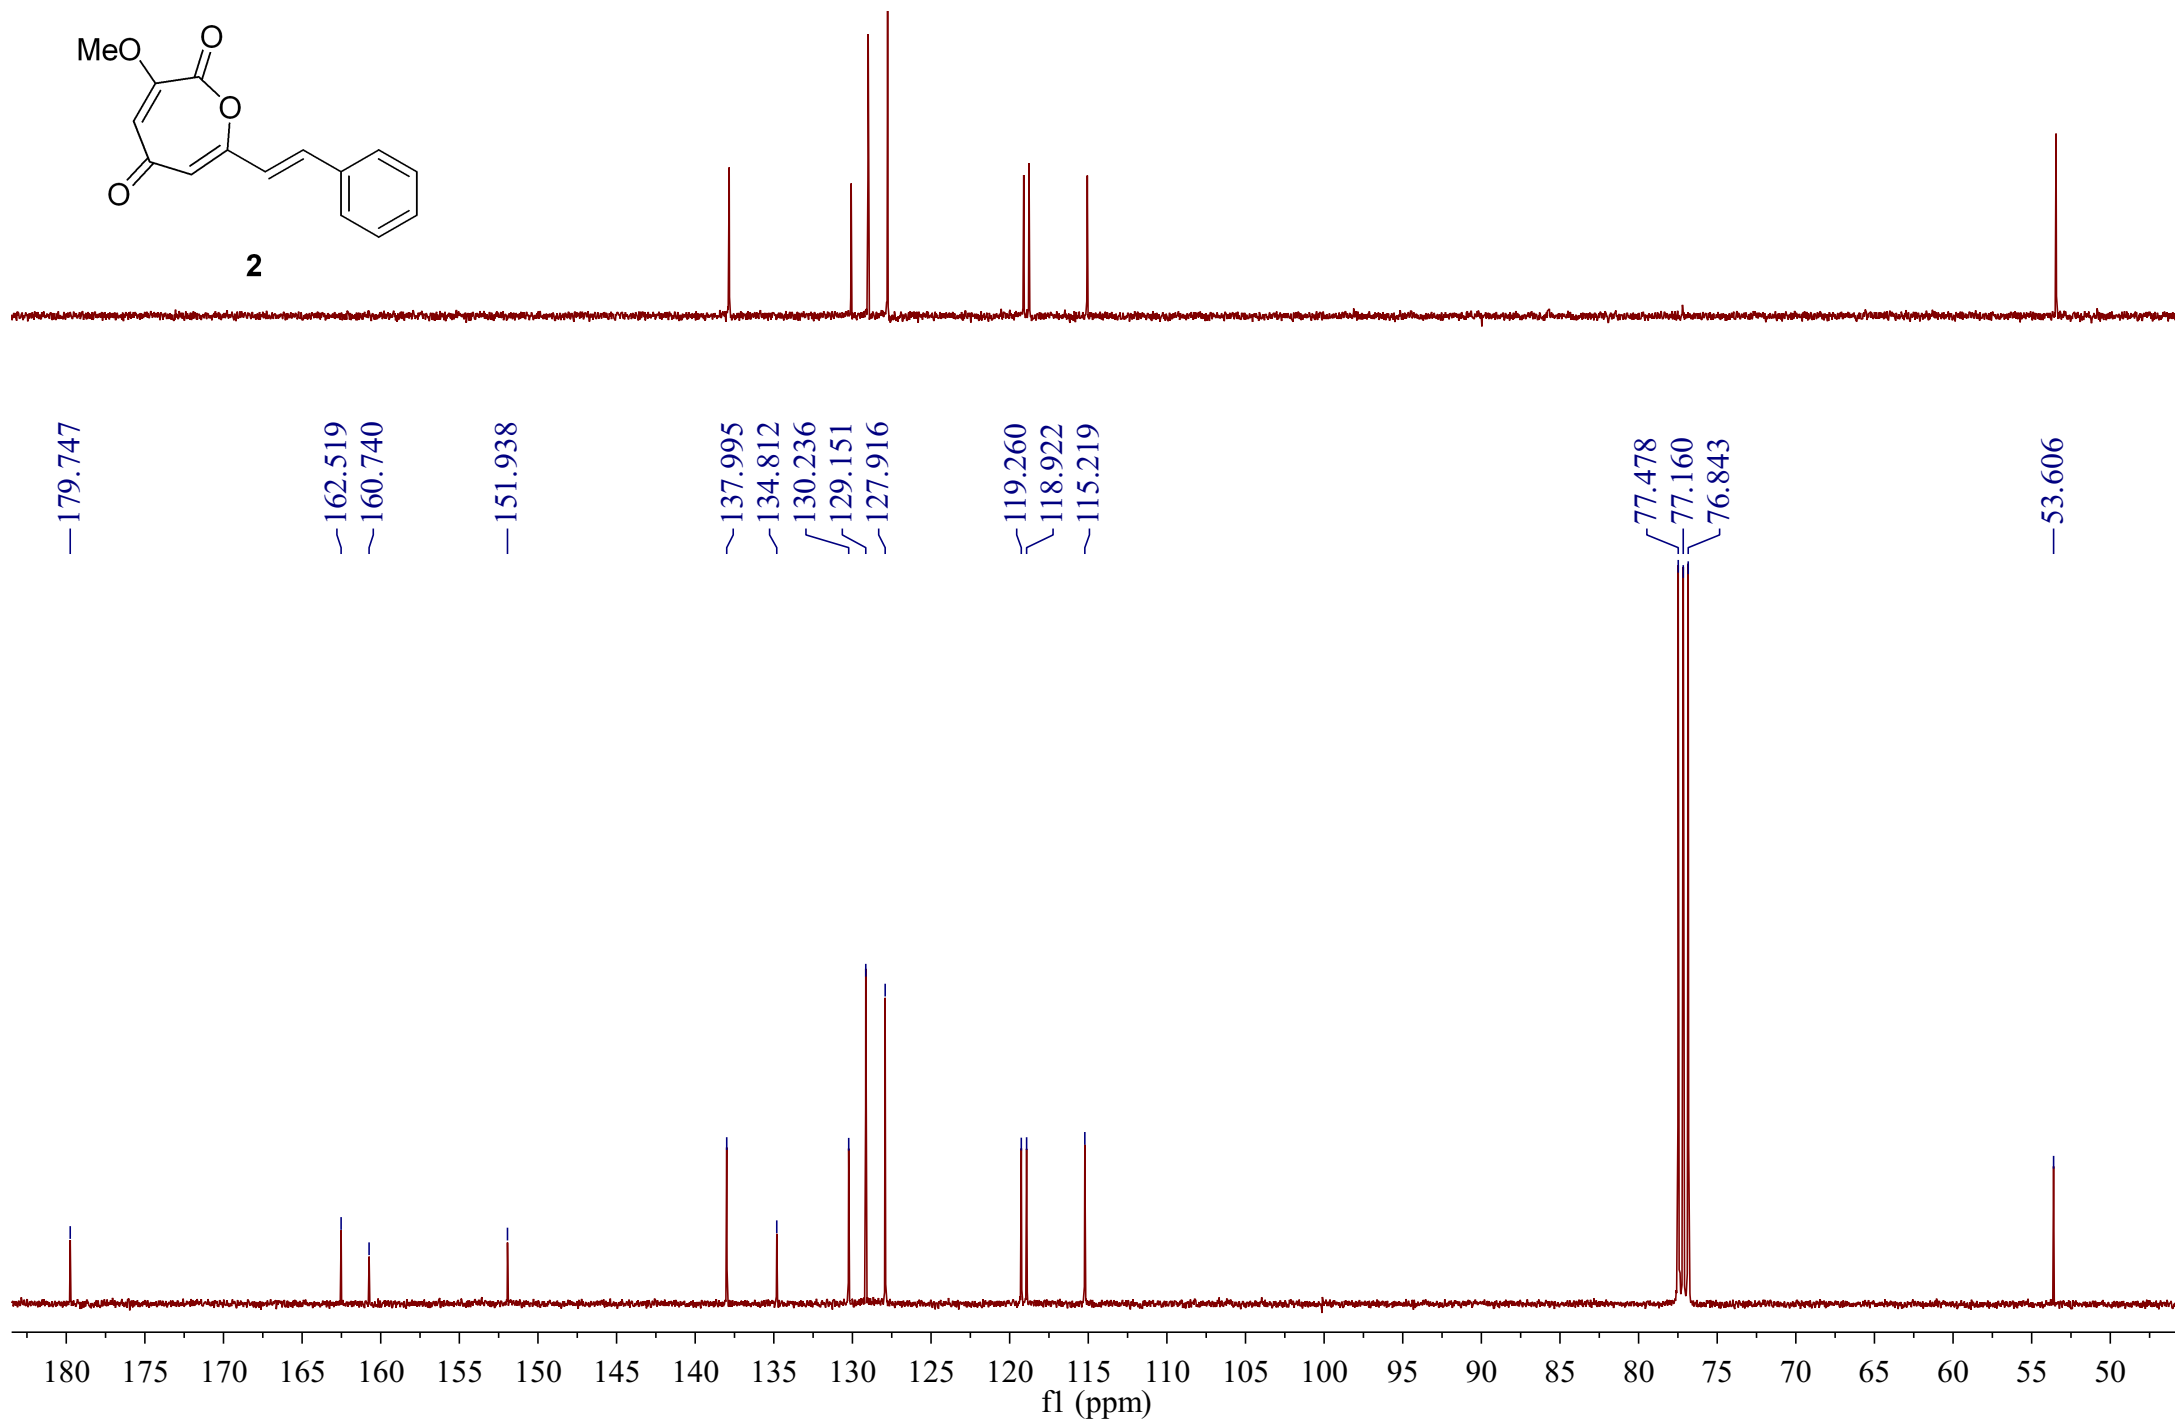

## S2.9. HSQC spectrum of compound 2

15

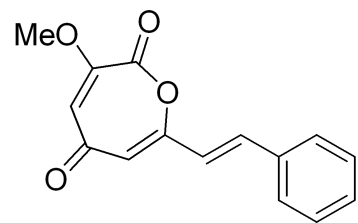

2

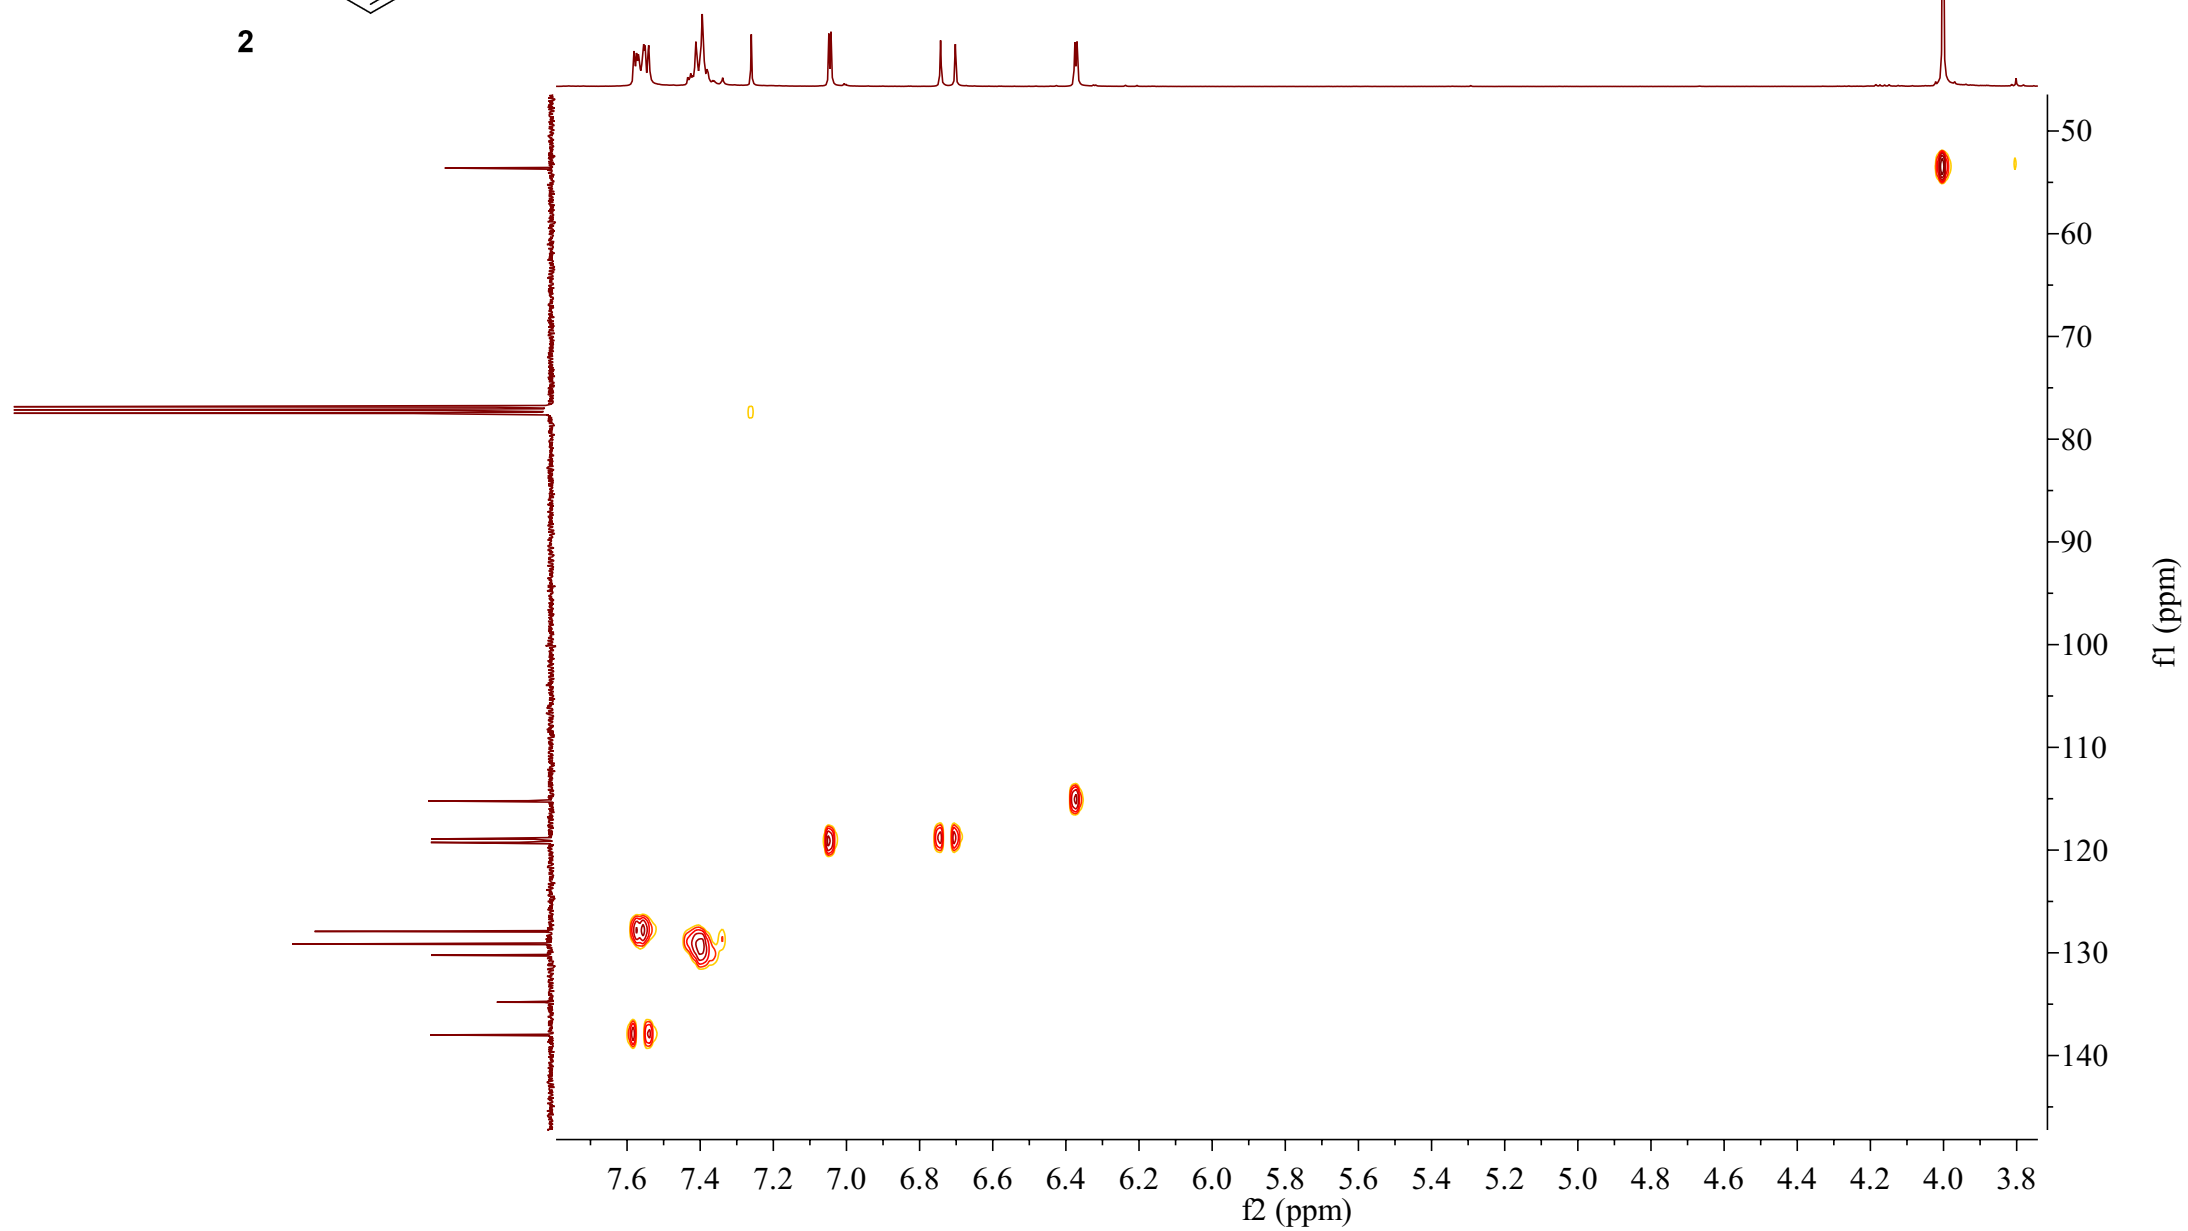

S2.10.  $^1\text{H}$ - $^1\text{H}$  COSY spectrum of compound 2

16

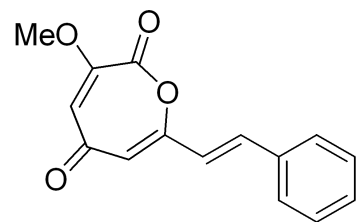

2

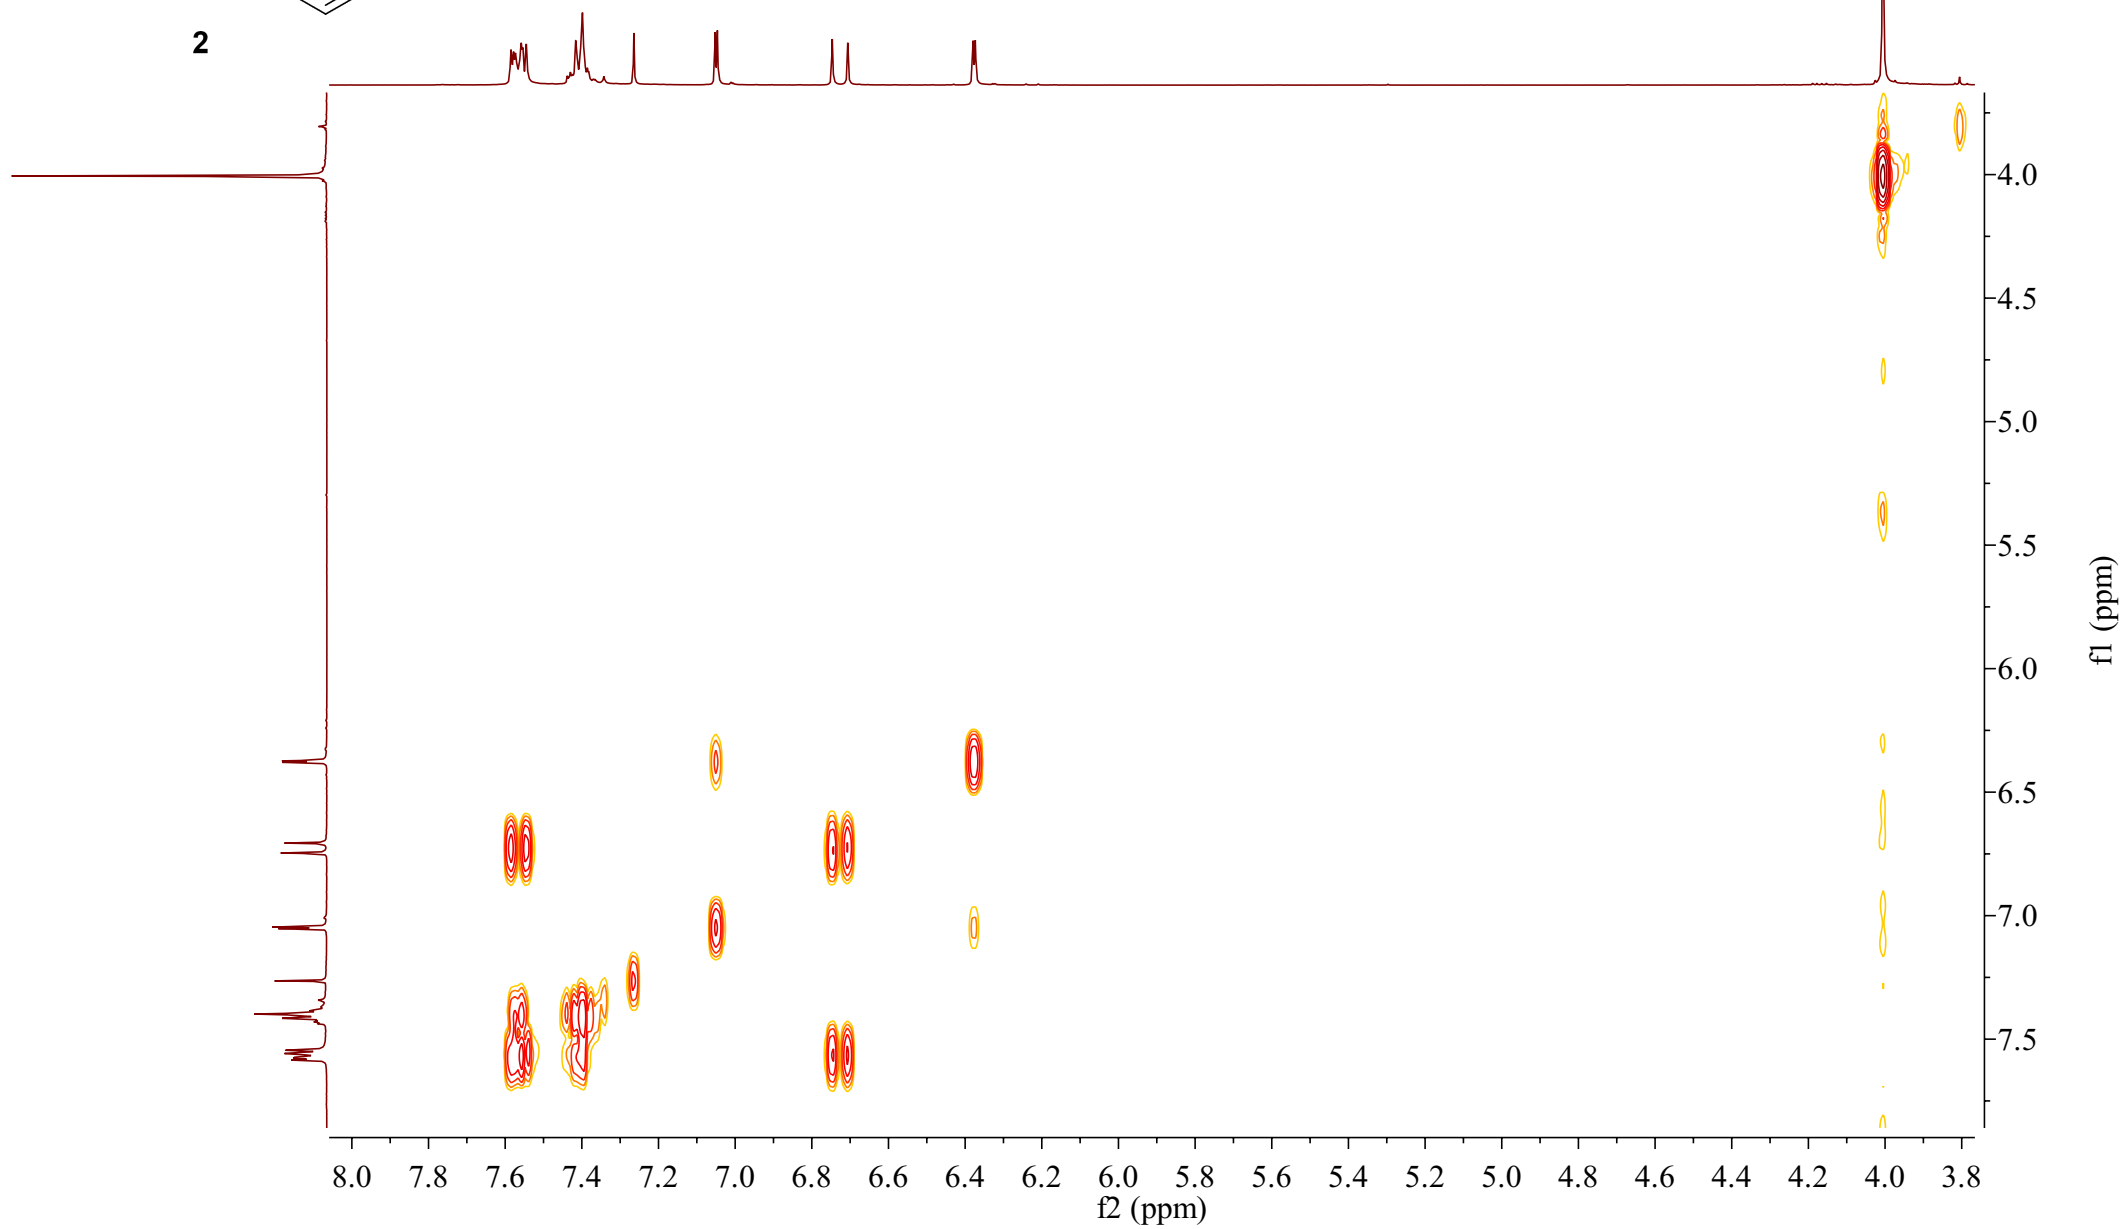

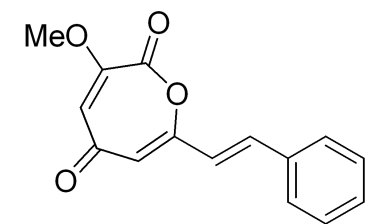

2

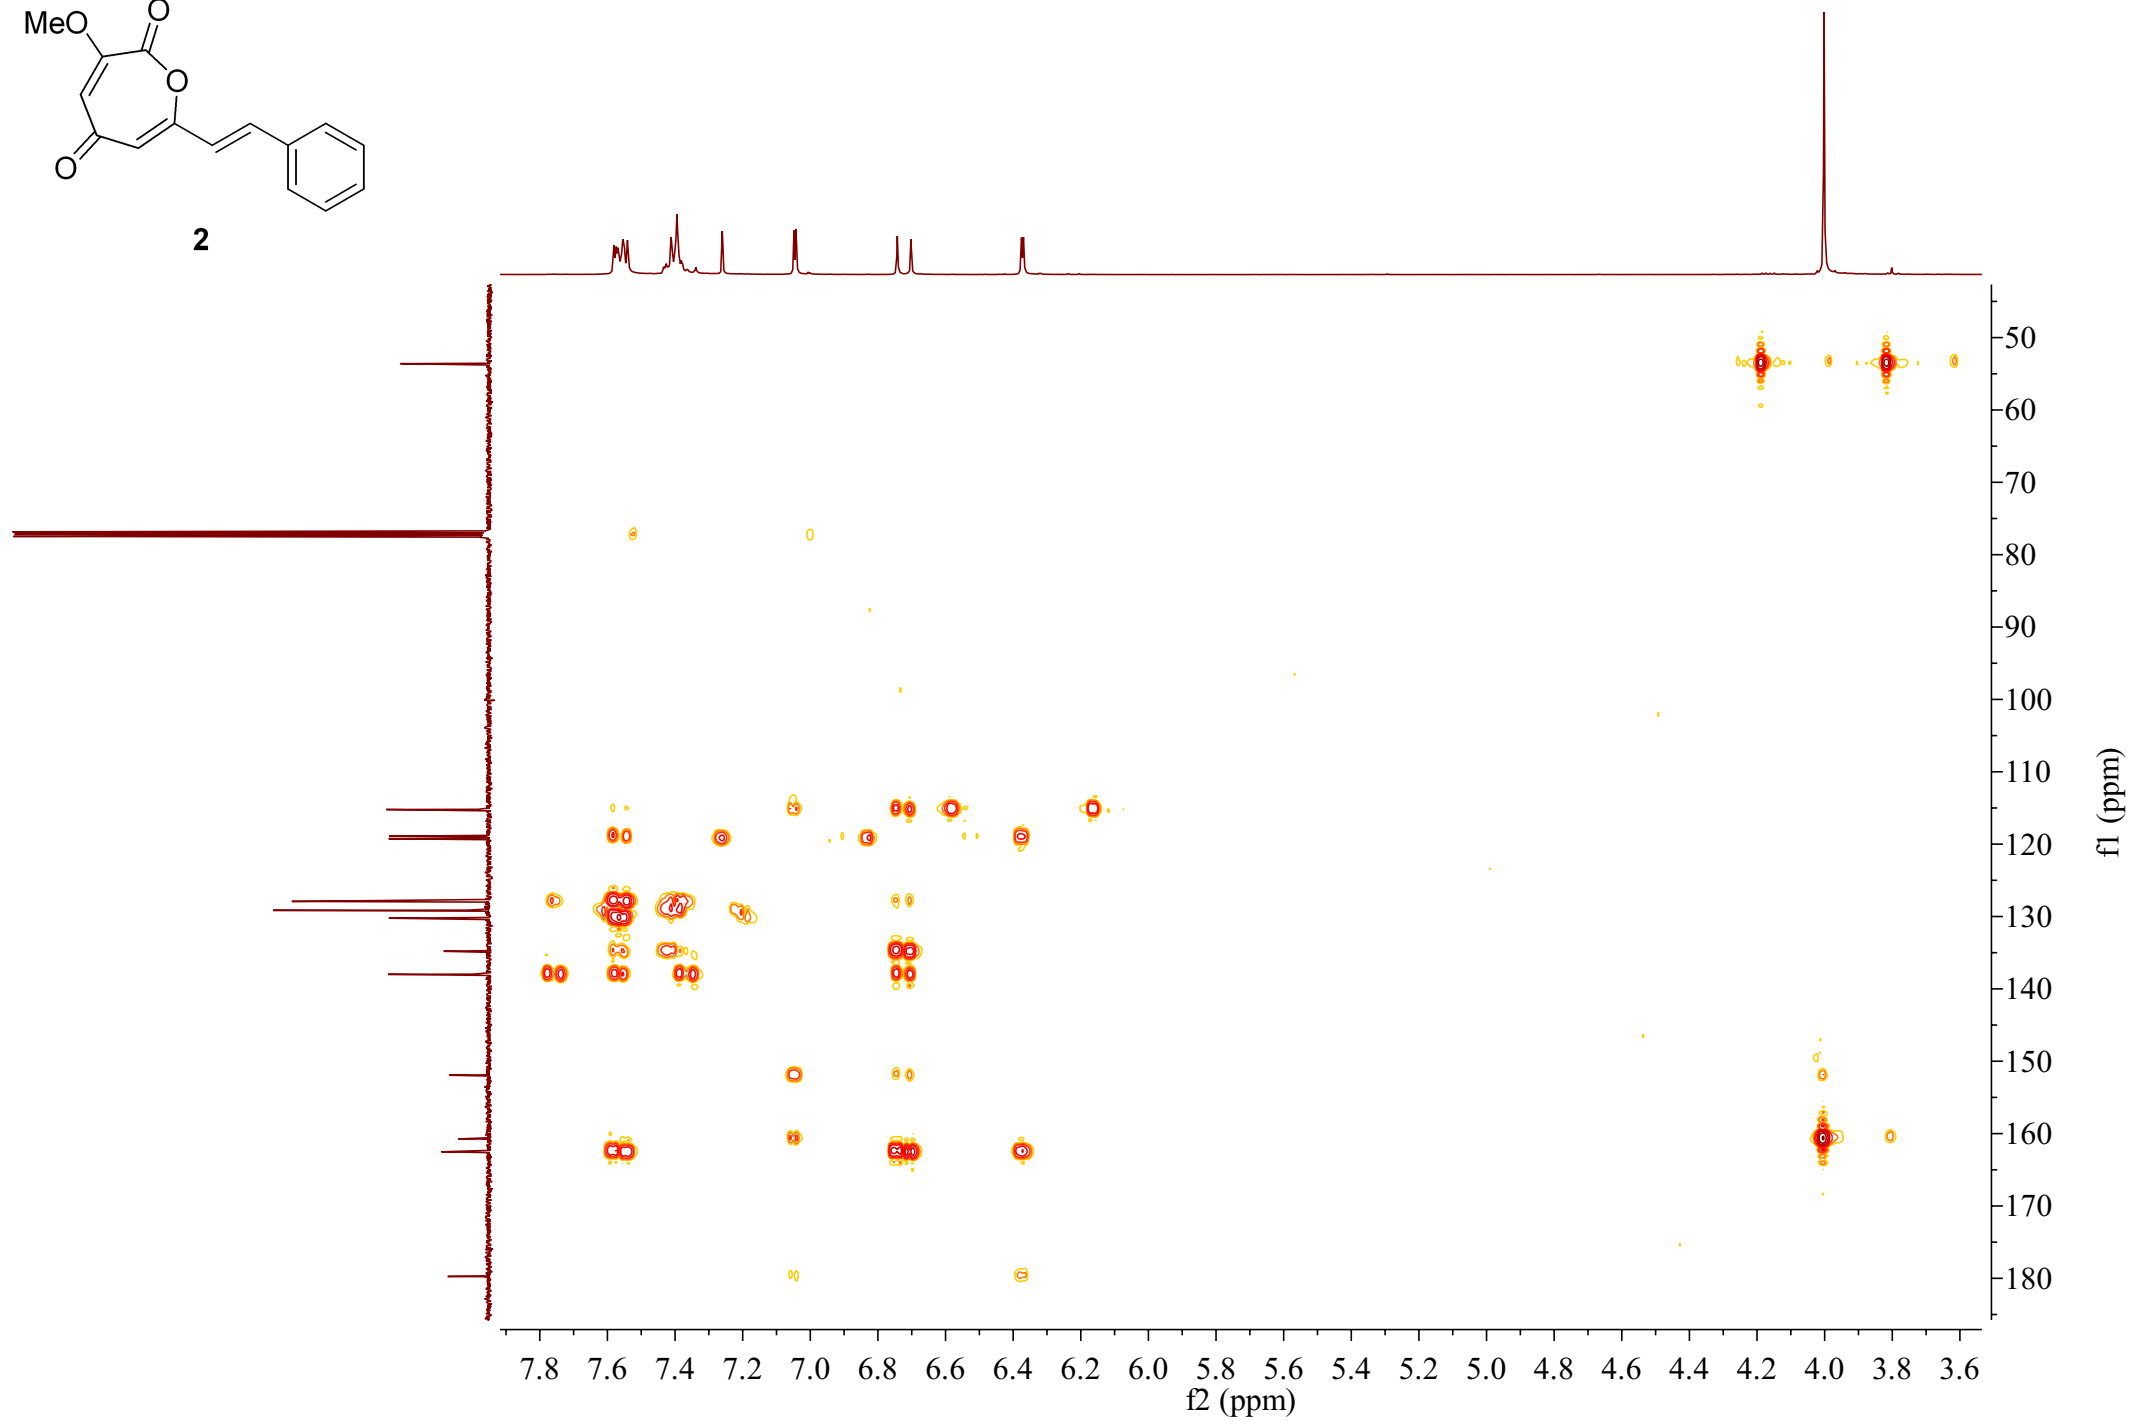

S2.12. <sup>1</sup>H NMR spectrum of compound 3

7.5565  
7.5396  
7.5156  
7.4754  
7.4076  
7.3905  
7.2596

6.7149  
6.6747

6.4292

4.0238  
4.0089

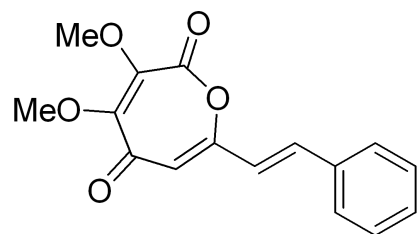

3

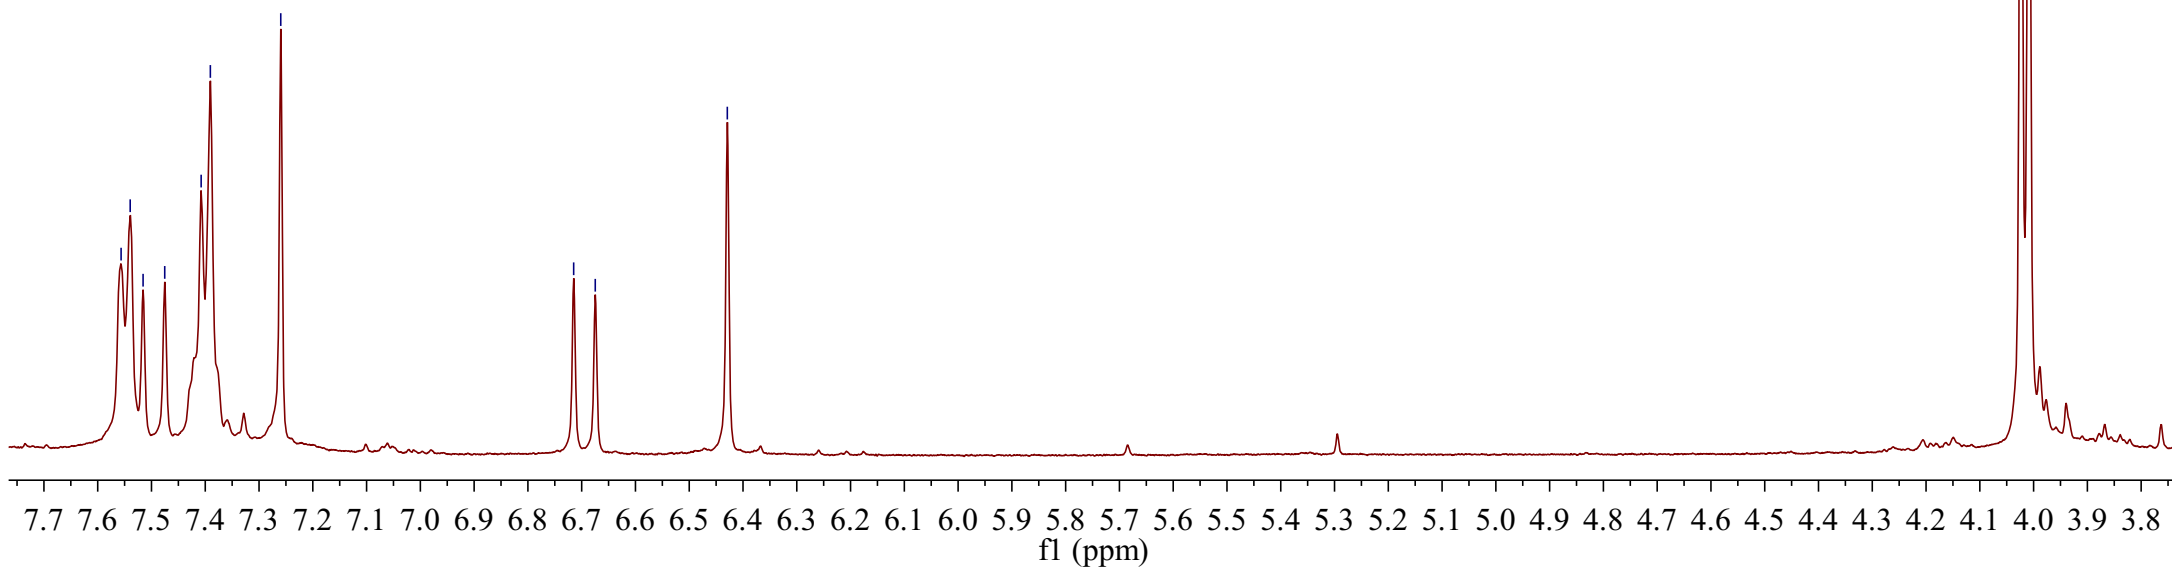

S2.13. <sup>13</sup>C NMR and DEPT spectra of compound 3

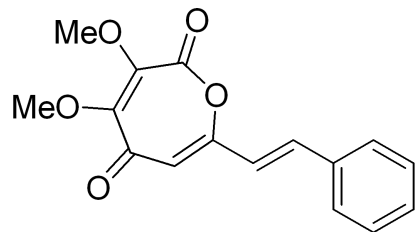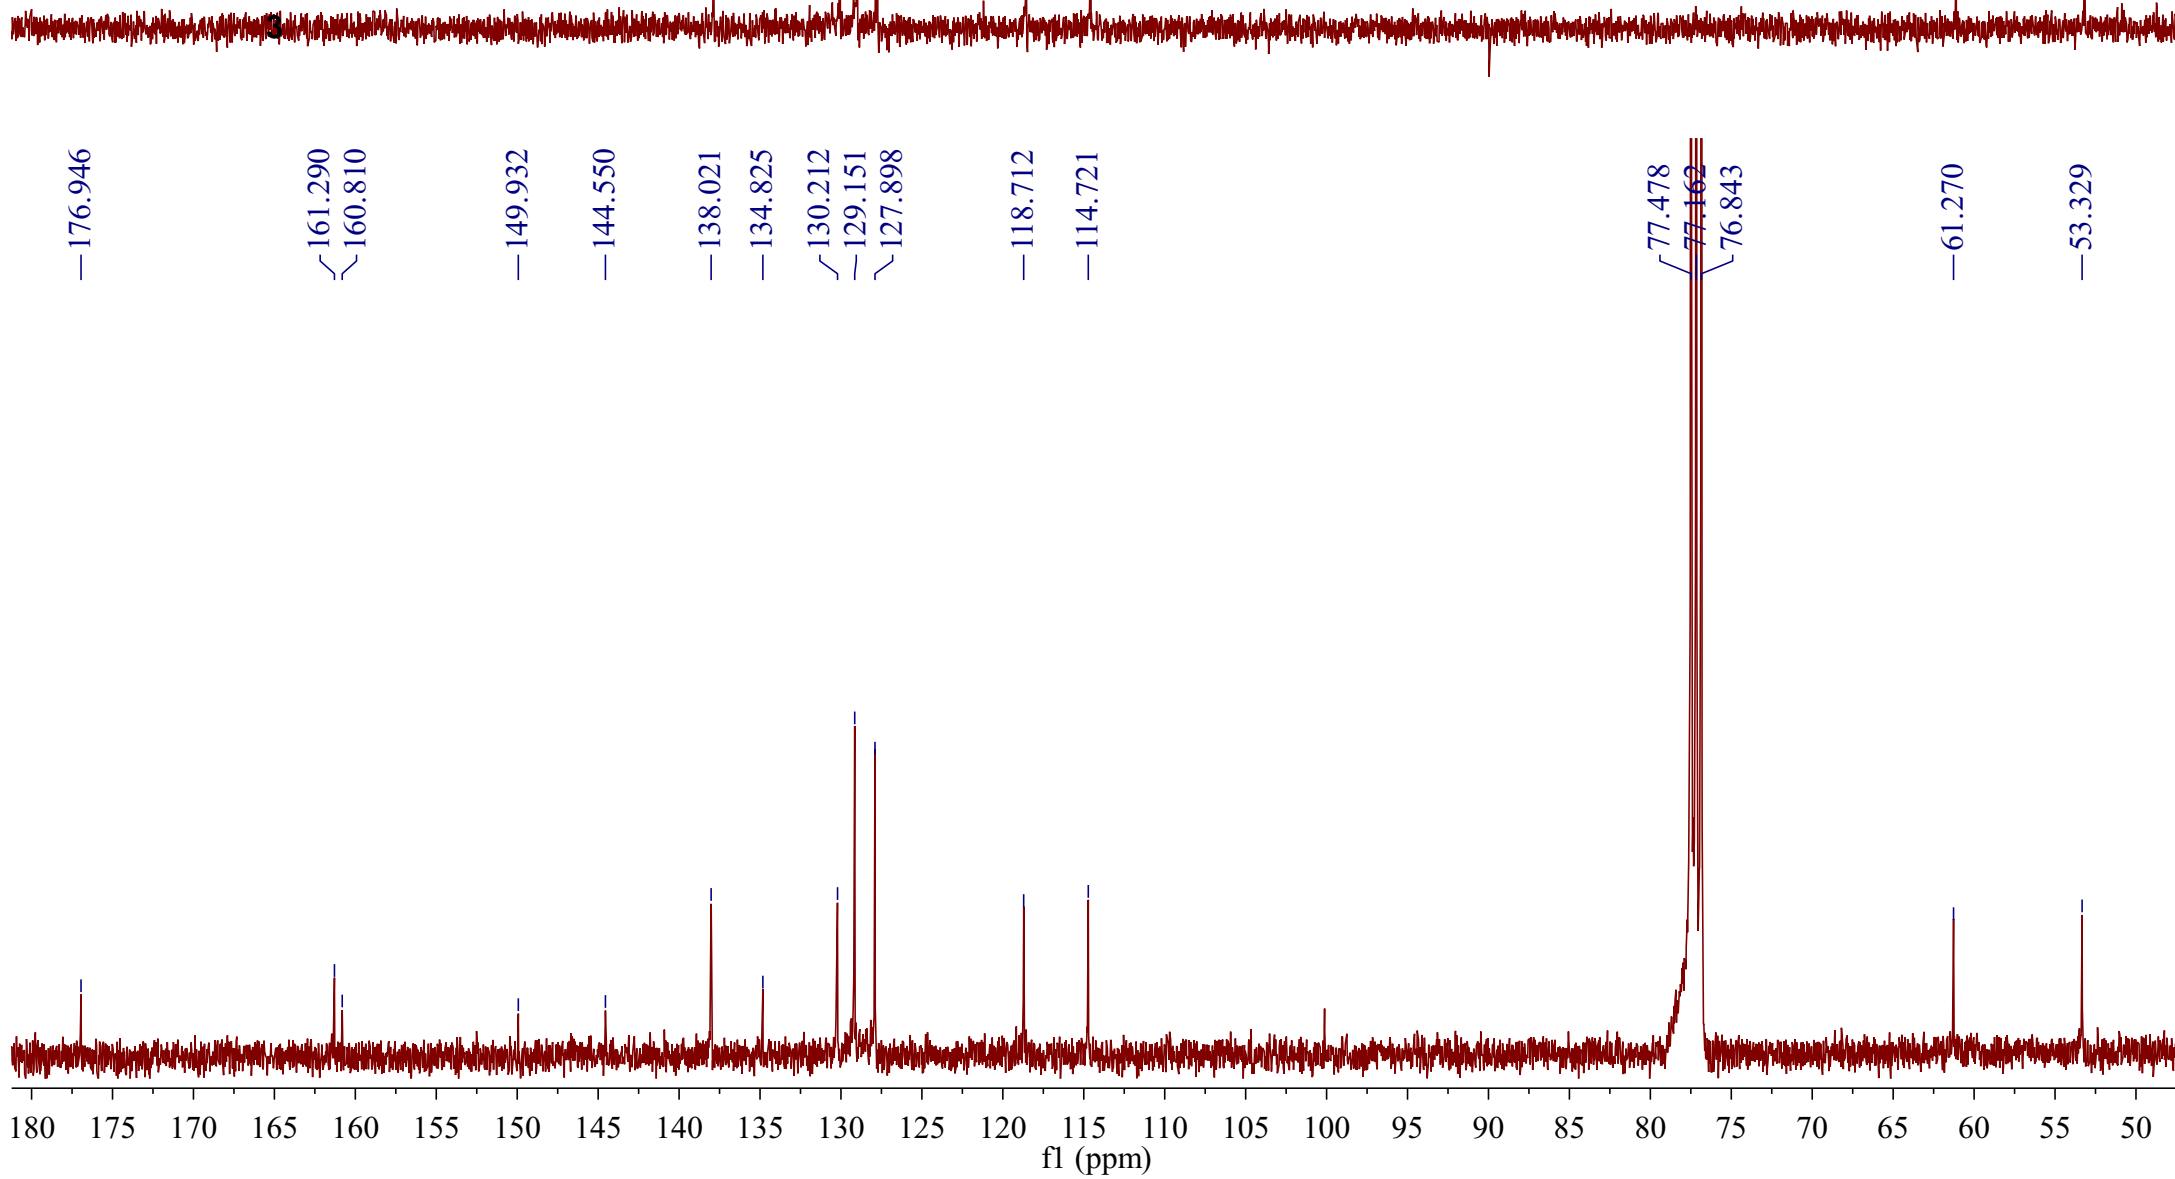

## S2.14. HSQC spectrum of compound 3

20

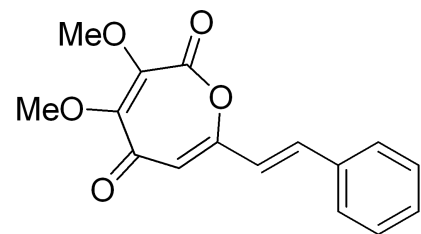

3

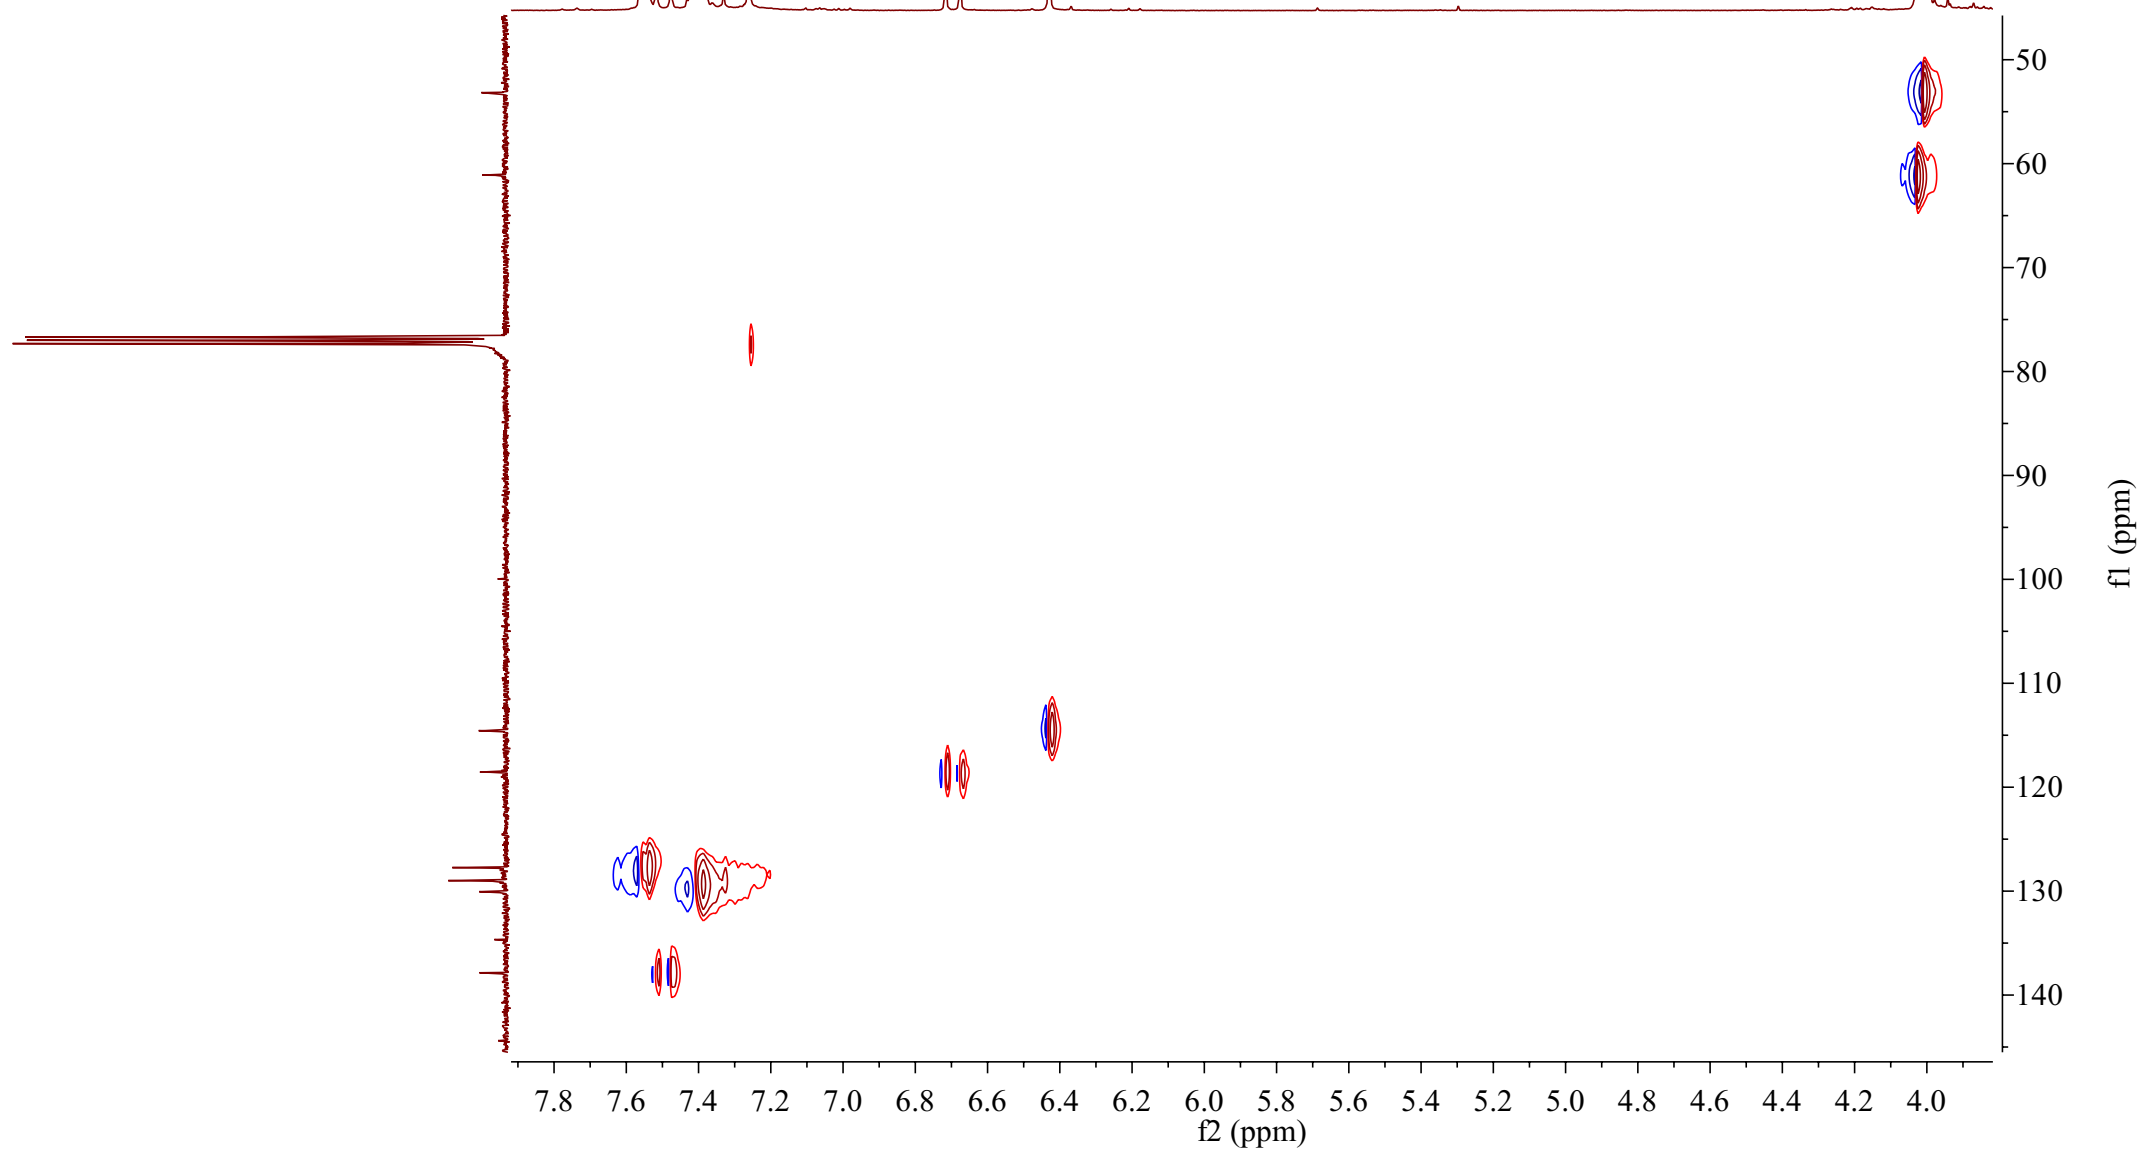



S2.15.  $^1\text{H}$ - $^1\text{H}$  COSY spectrum of compound 3

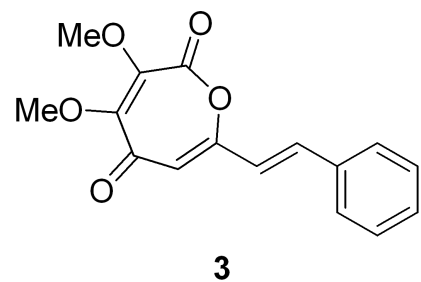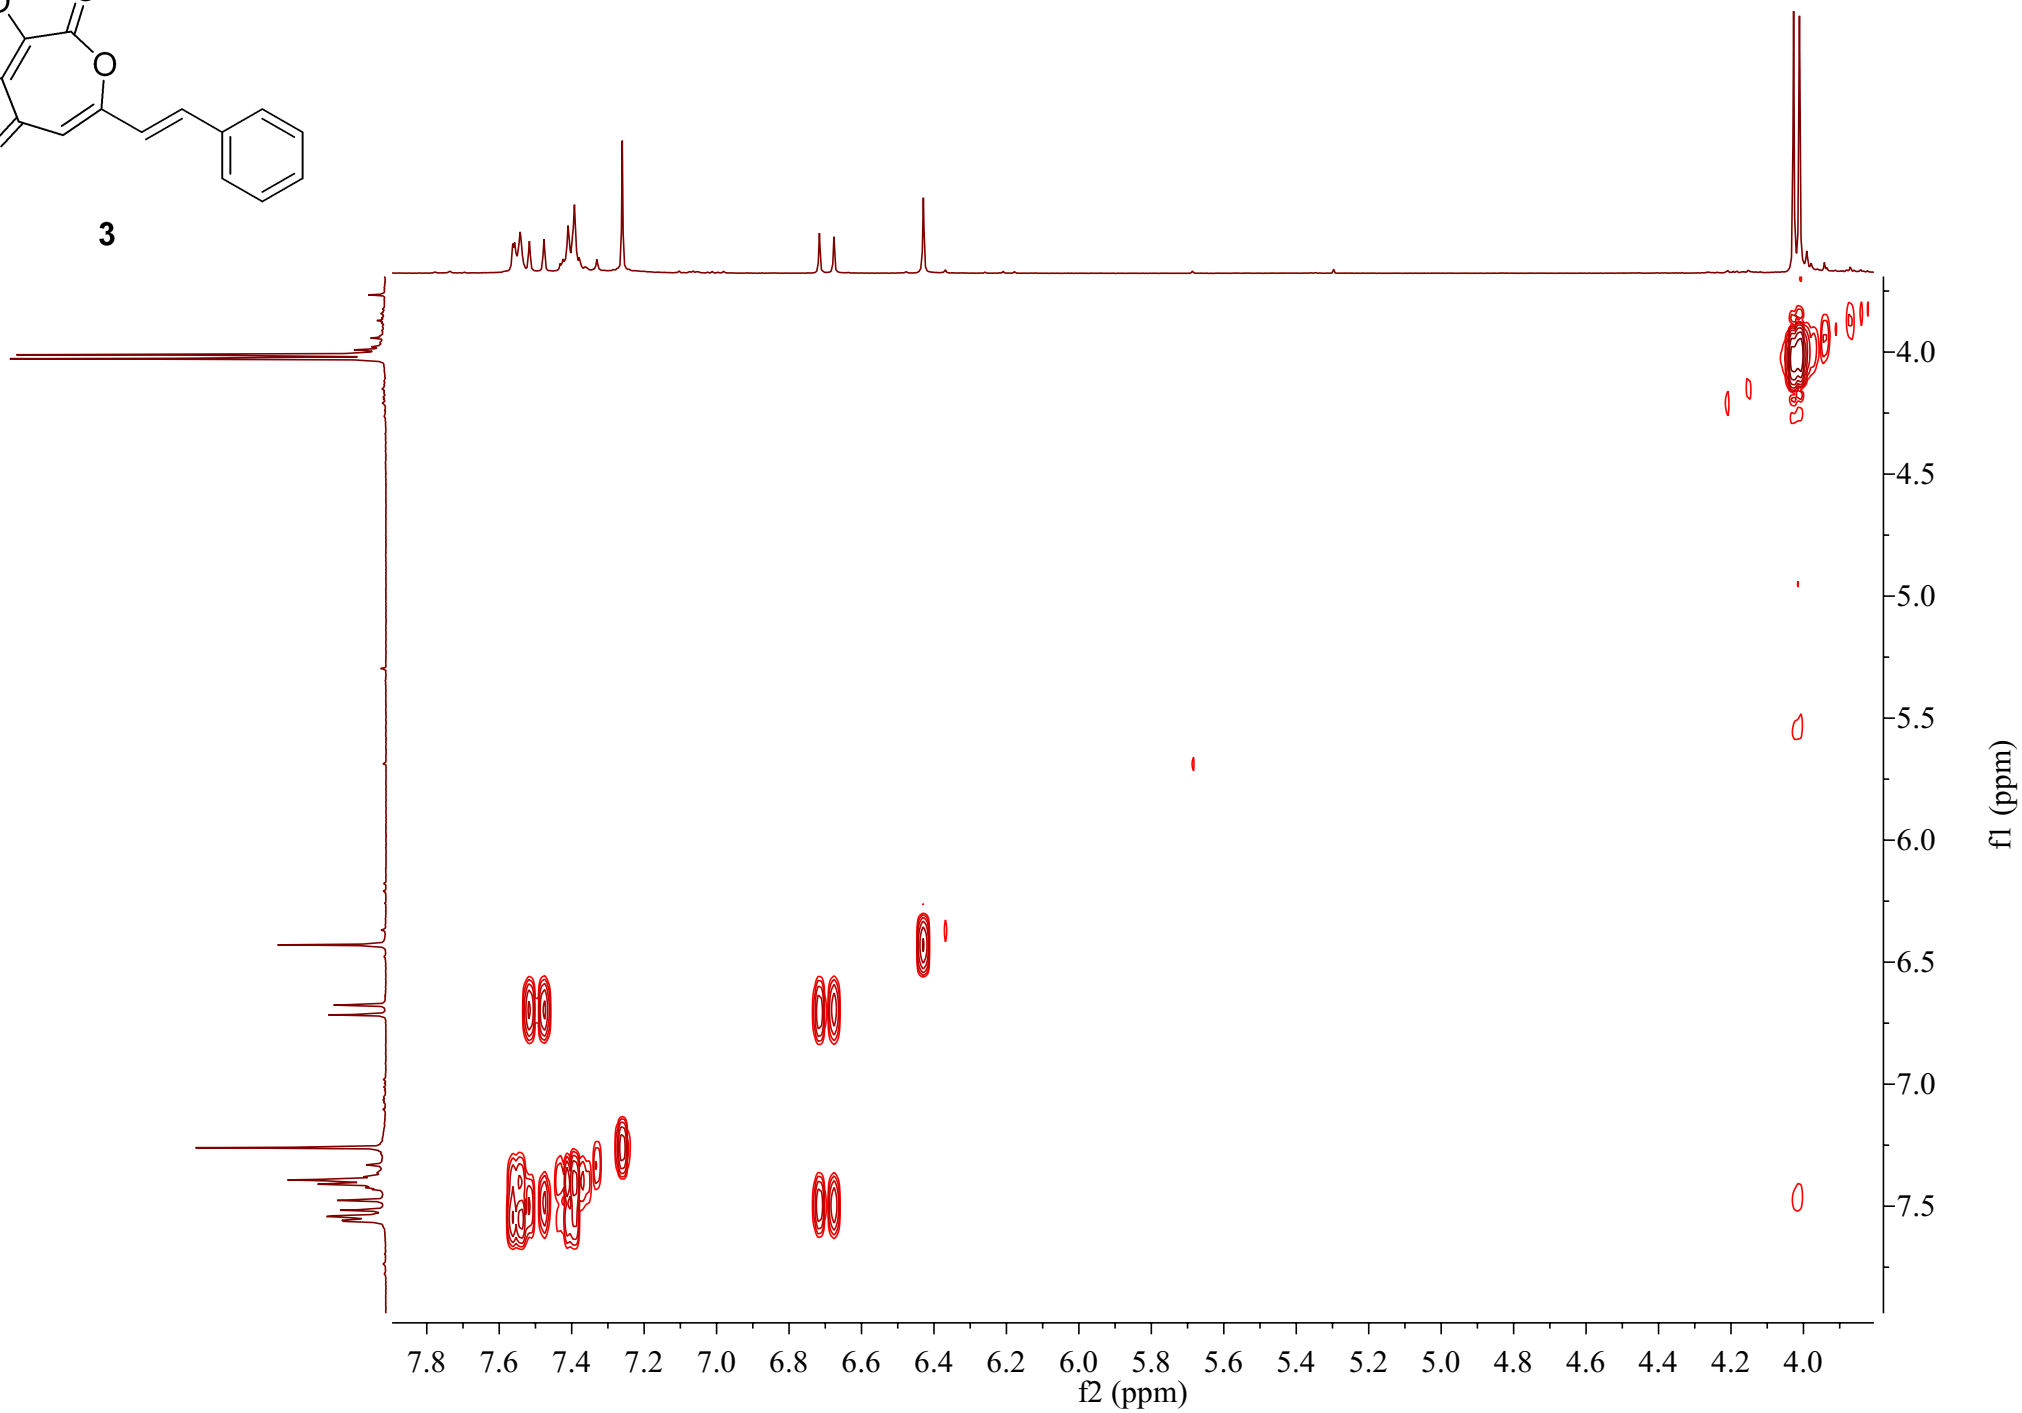

## S2.16. HMBC spectrum of compound 3

22

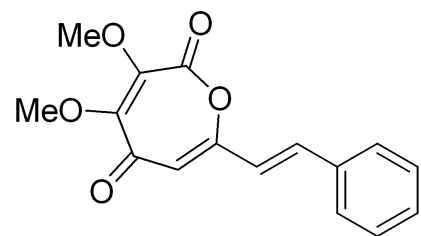

3

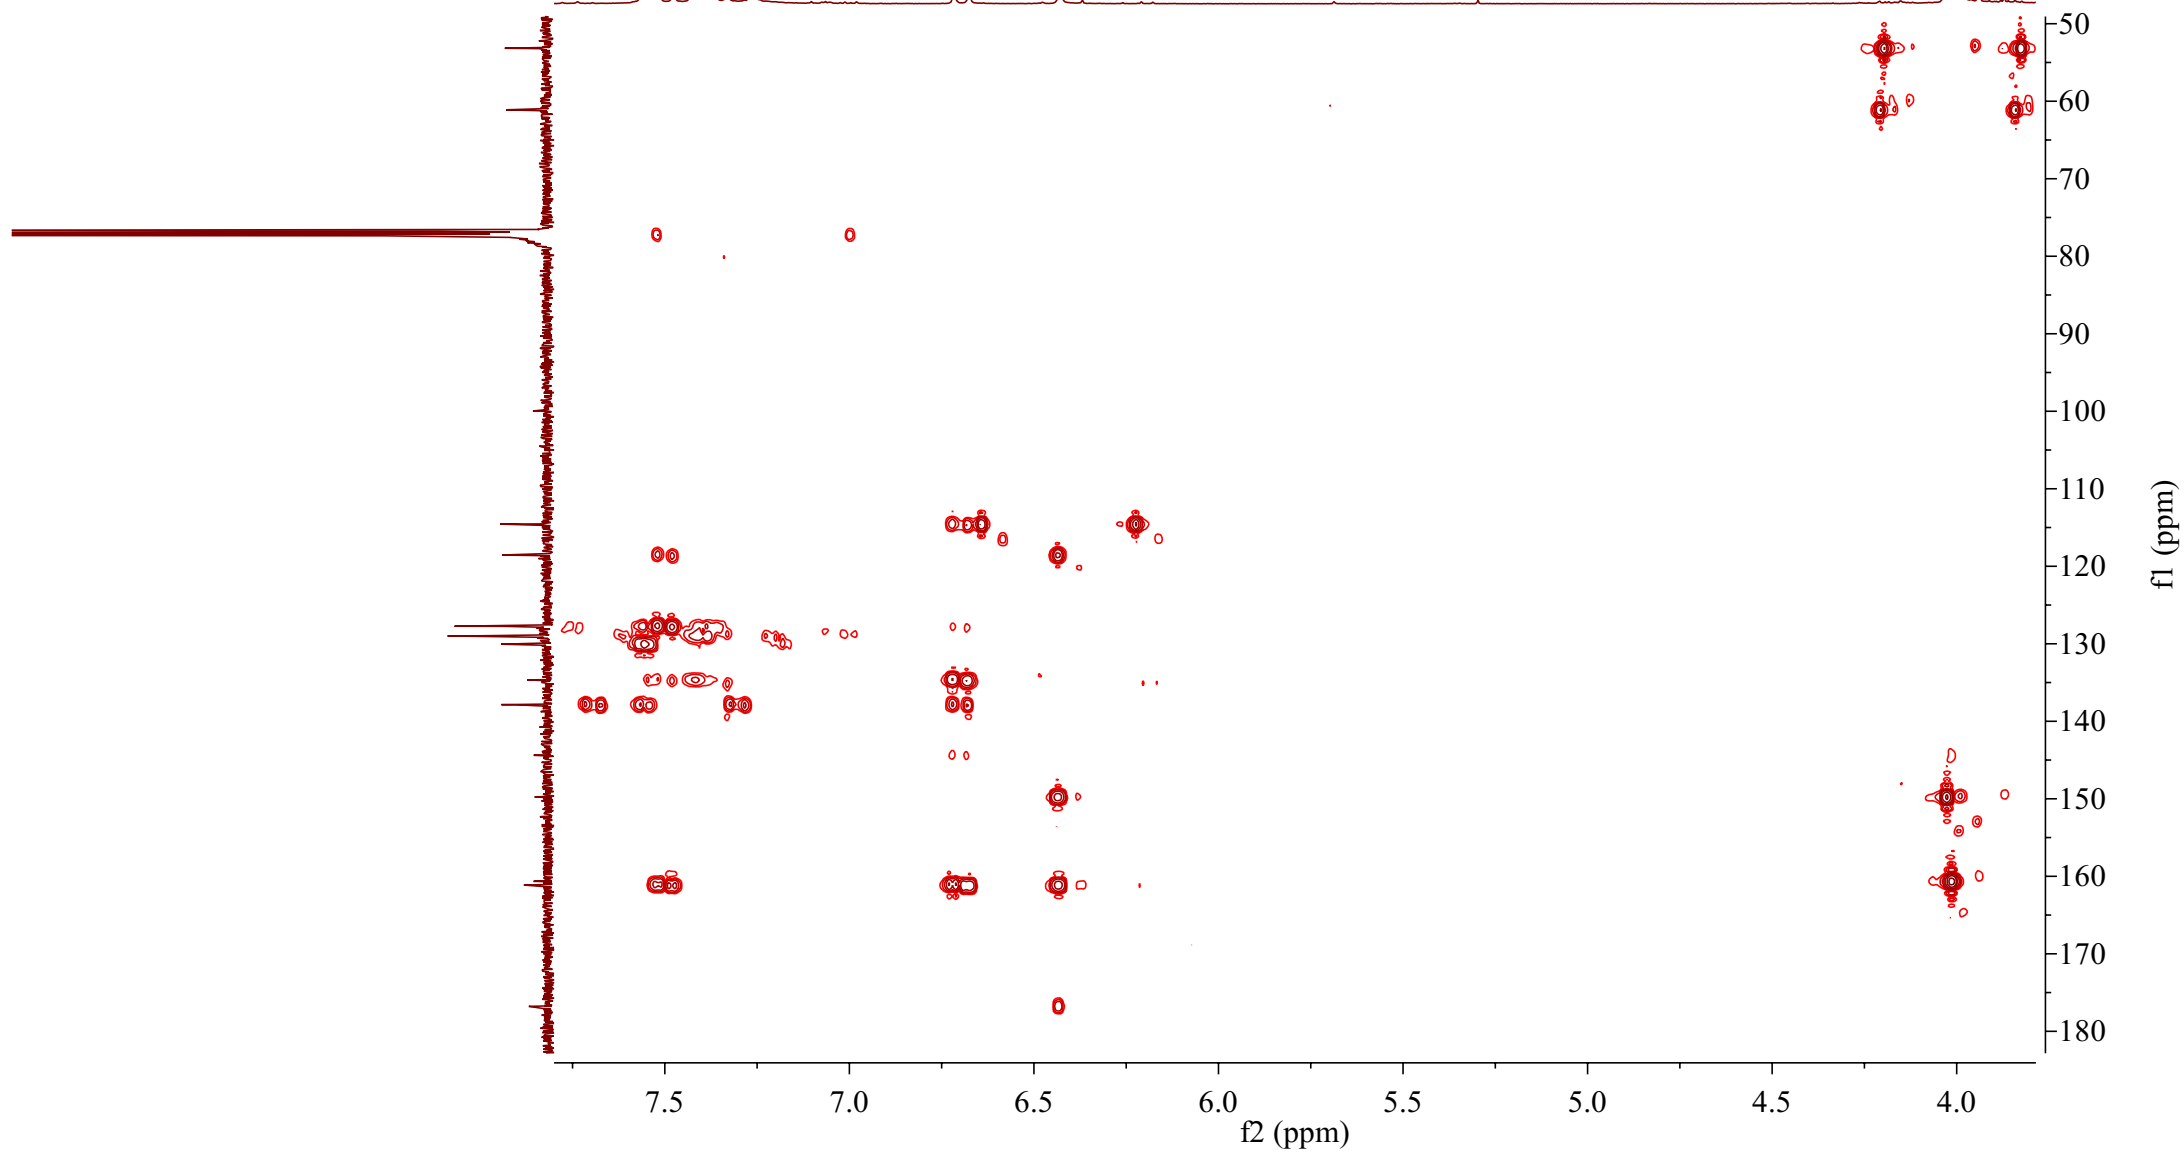

7.2603  
7.2413  
7.2226  
7.1451  
7.1296  
7.0345  
7.0165

6.4034  
6.3703

4.2505  
4.2173  
4.1998  
4.1169  
3.9872  
3.9805  
3.9522  
3.9467  
3.7365  
3.6579  
3.6503  
3.5827  
3.5477  
3.5407  
3.5057

2.7890  
2.7819  
2.7466  
2.7395

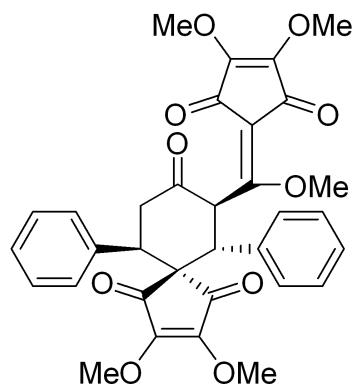

4a

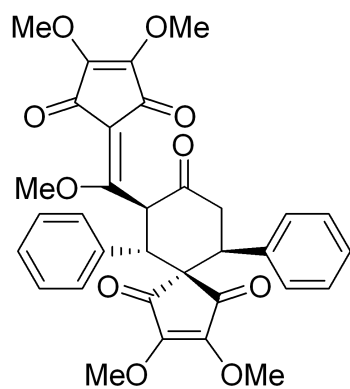

4b

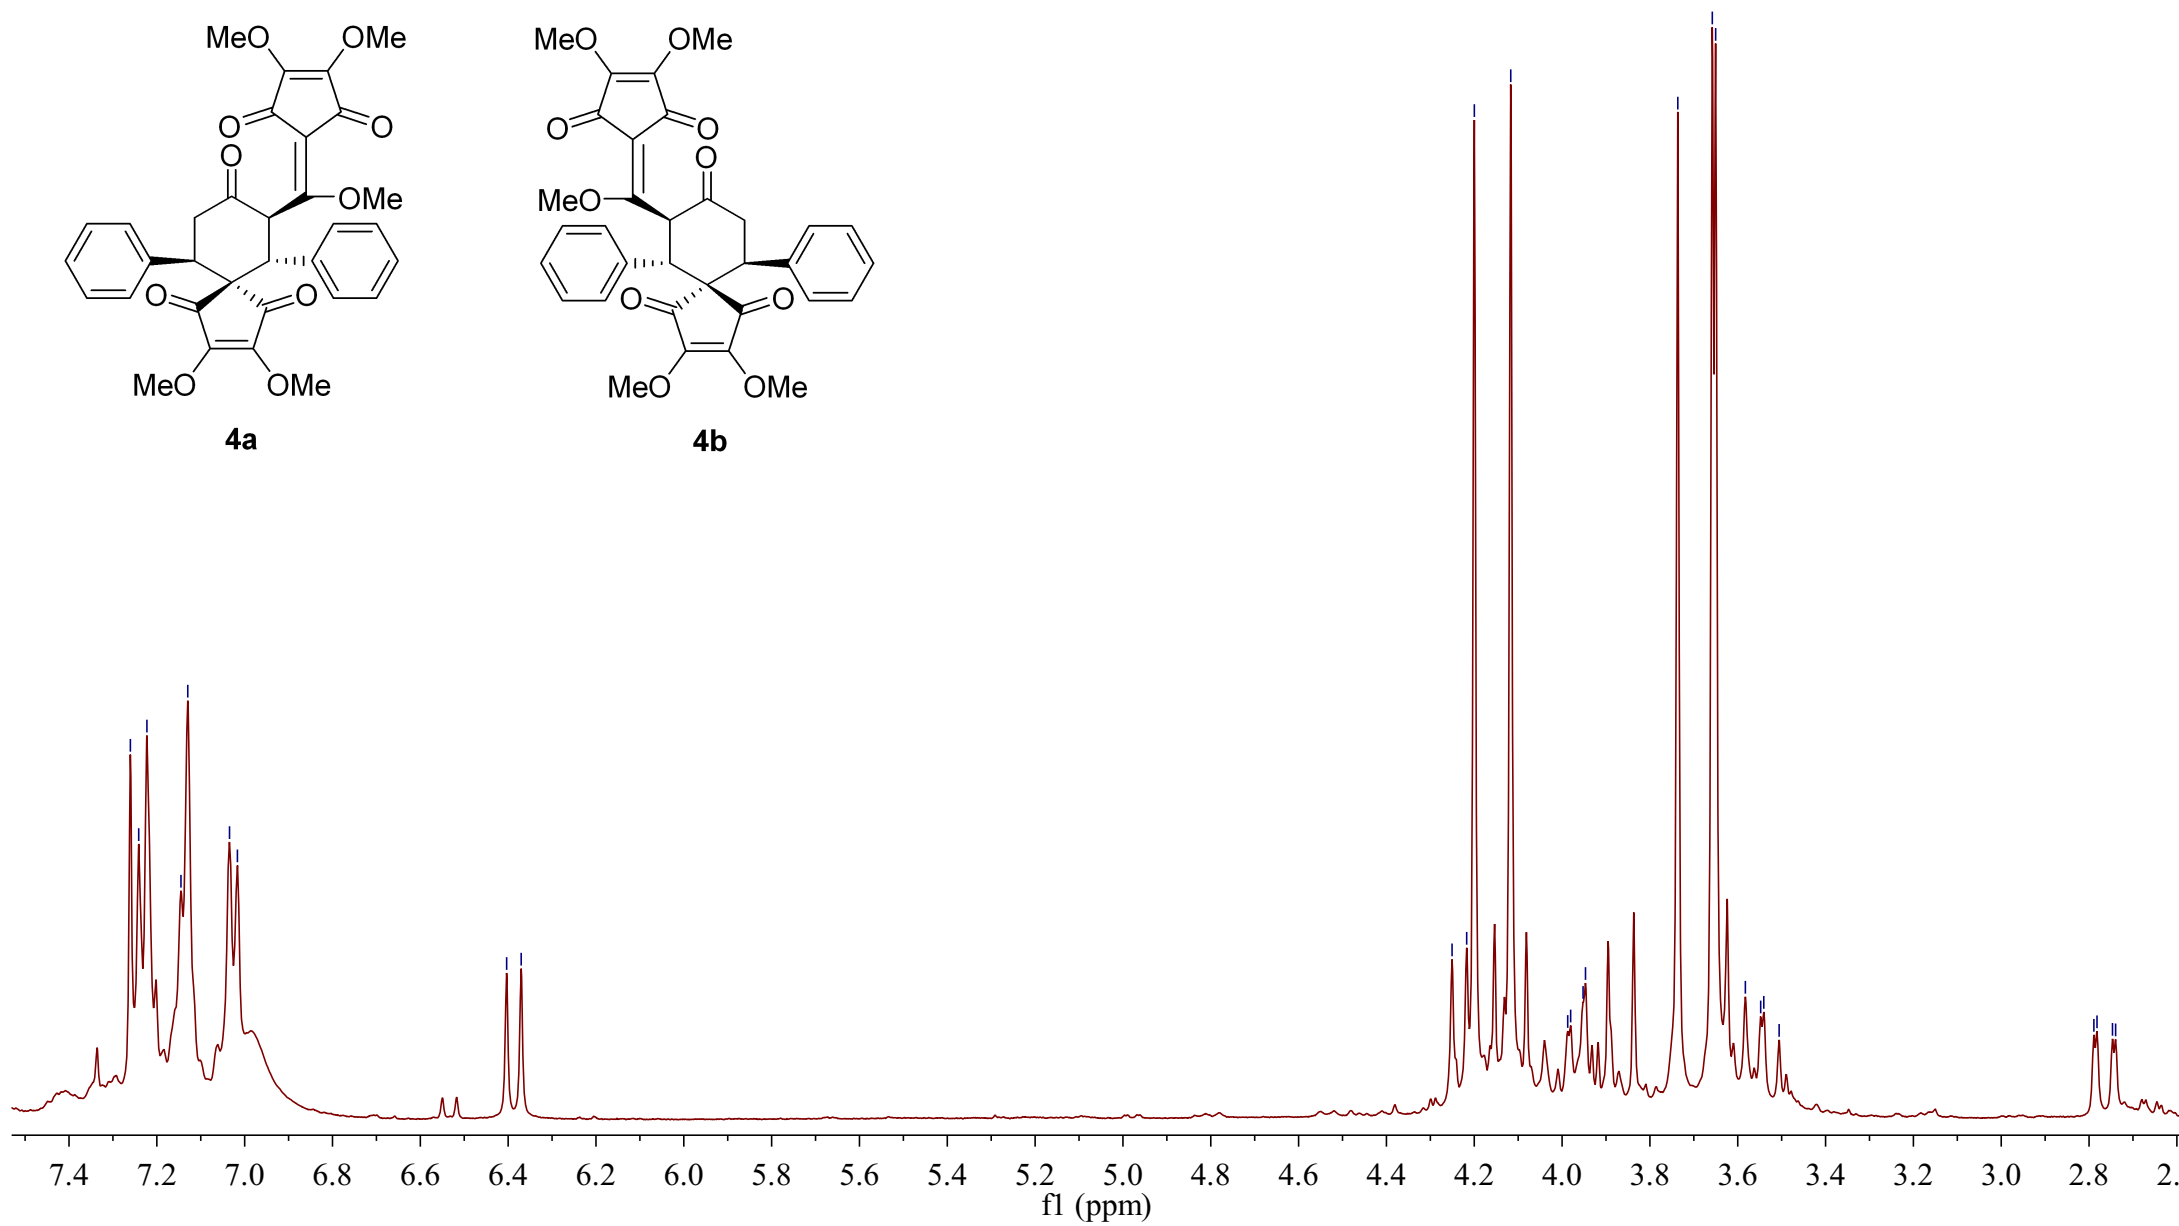

S2.18.  $^{13}\text{C}$  NMR and DEPT spectra of compounds **4a** and **4b**

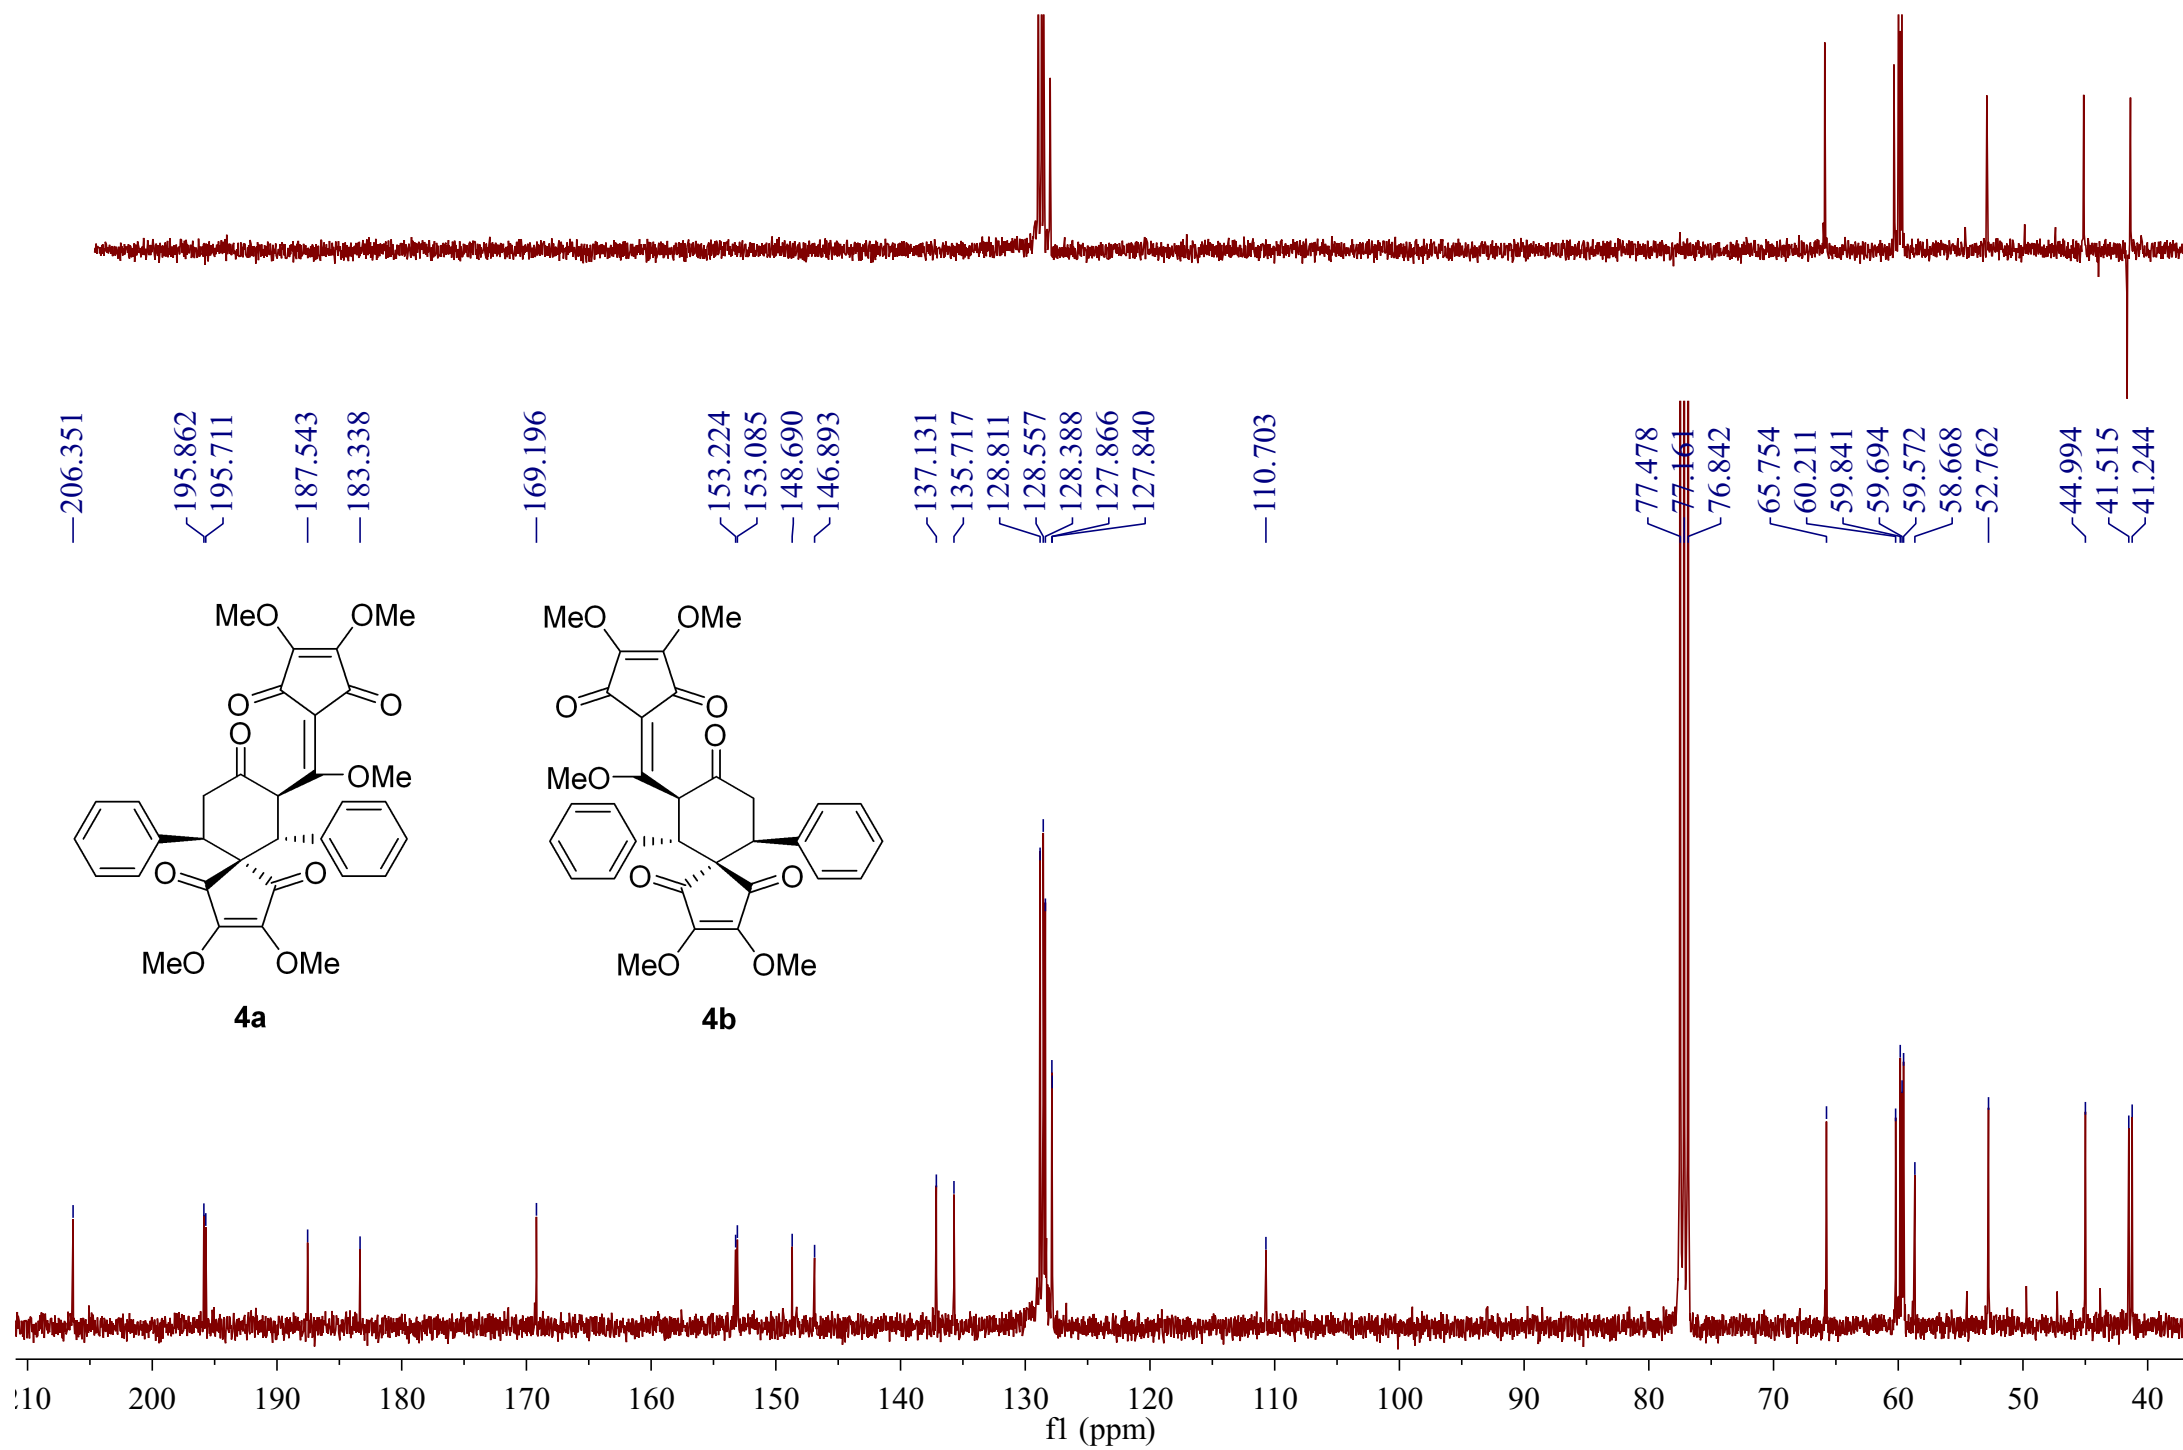

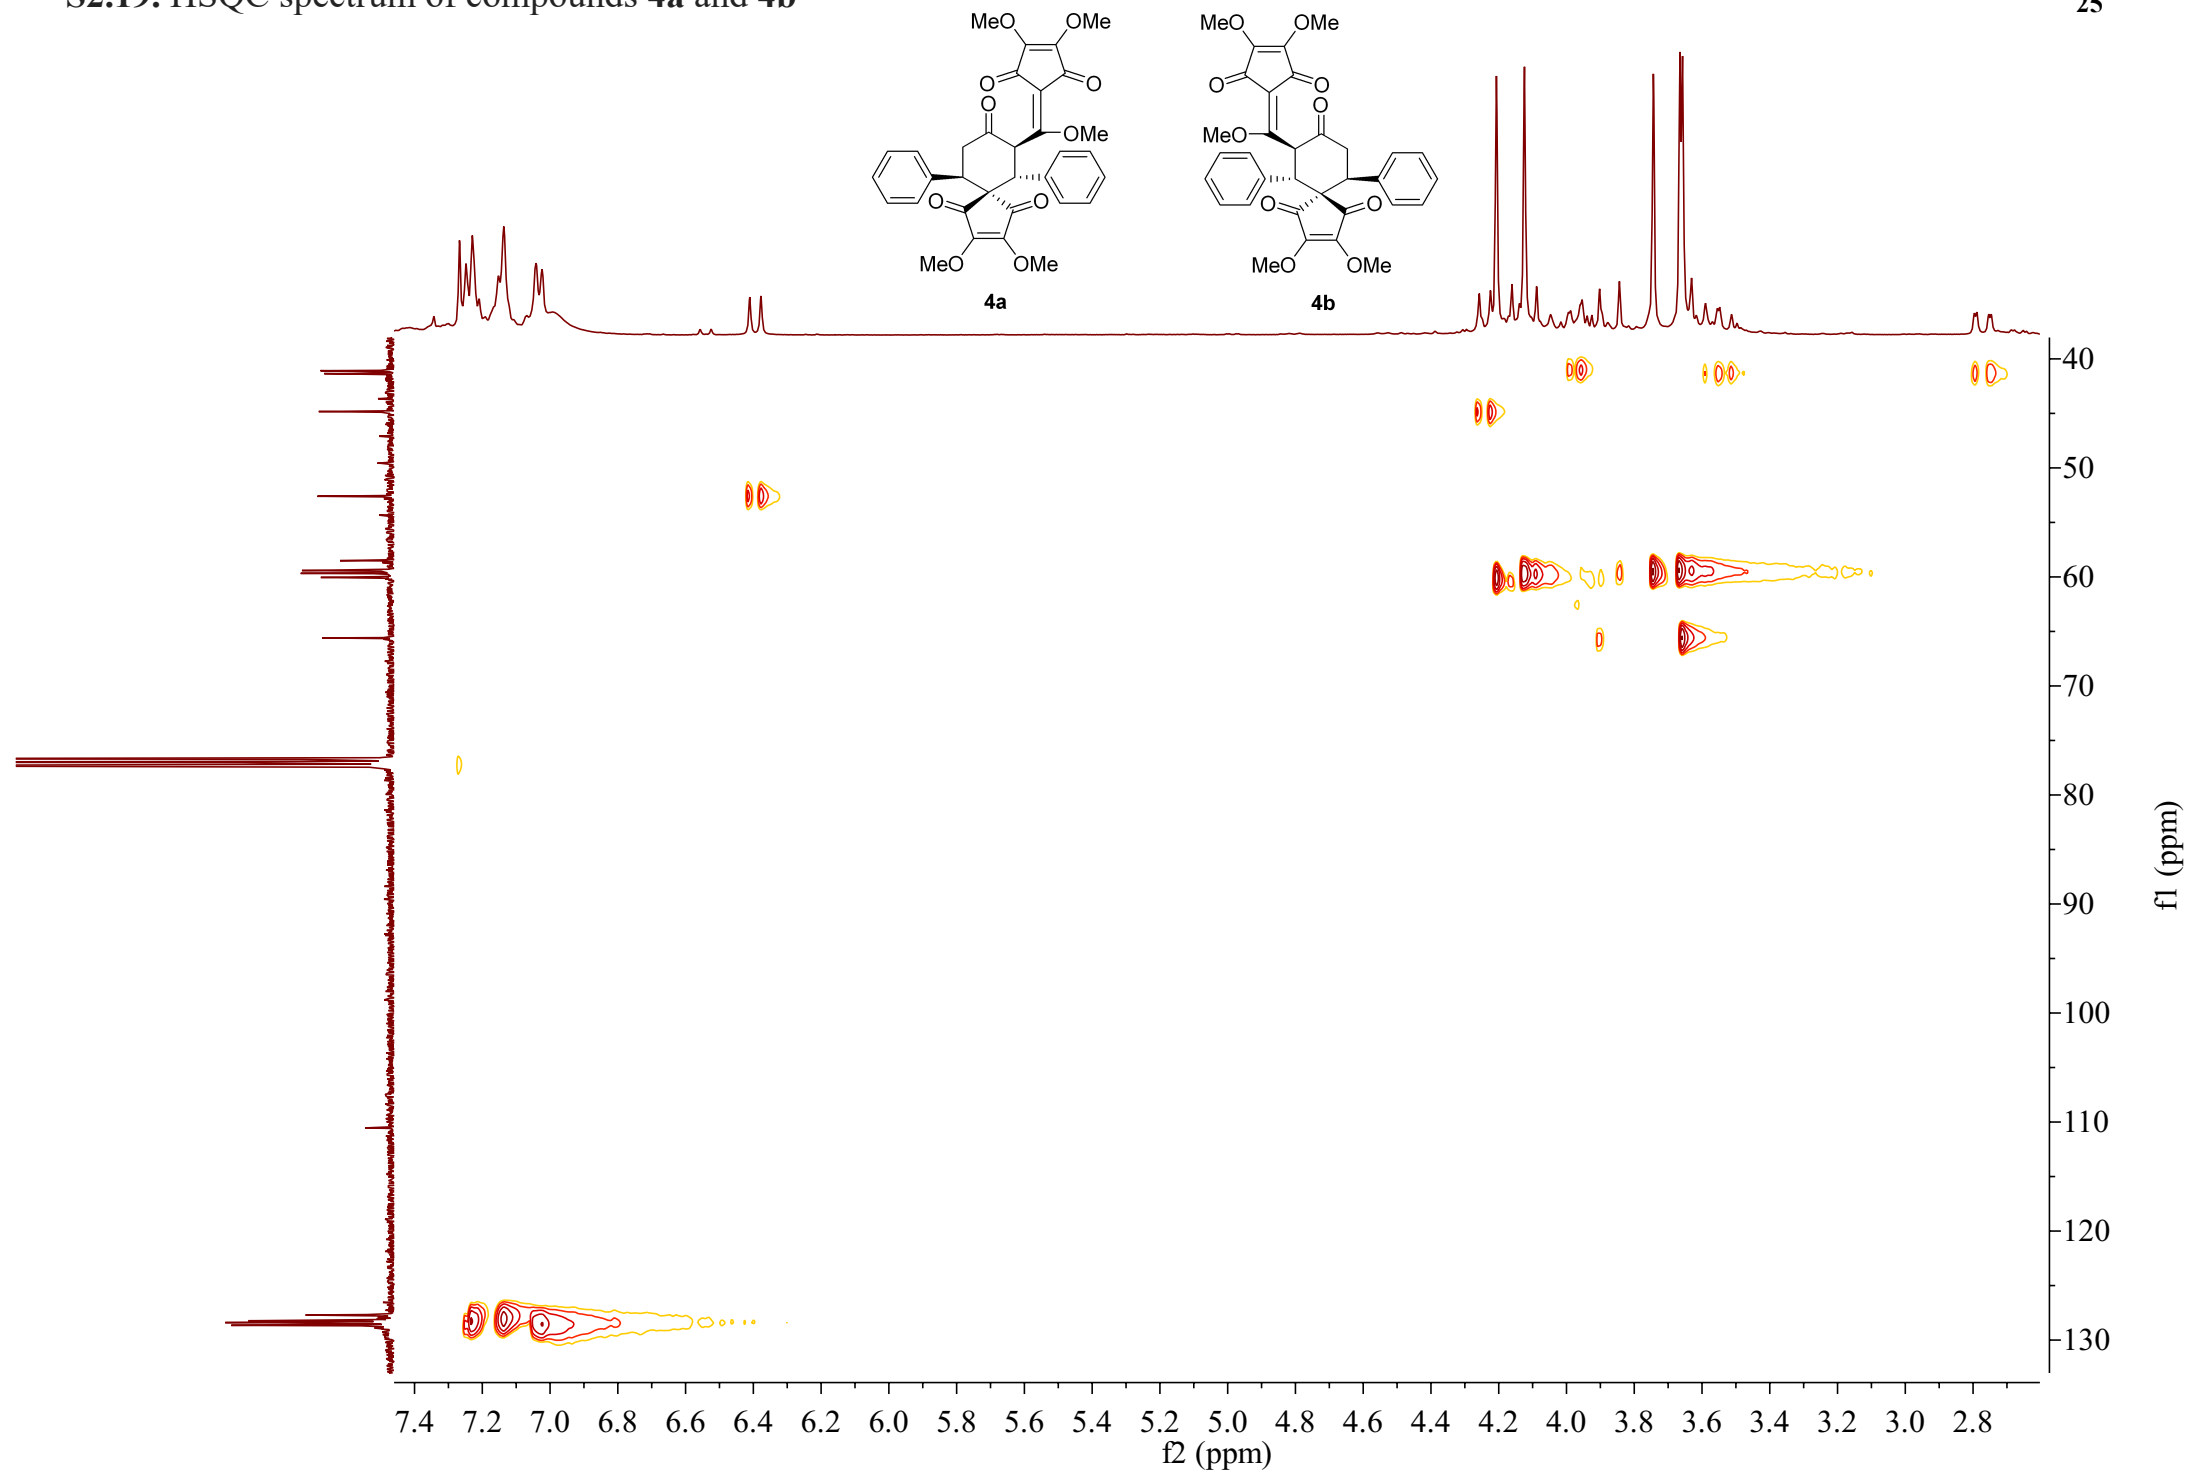

S2.20.  $^1\text{H}$ - $^1\text{H}$  COSY spectrum of compounds **4a** and **4b**

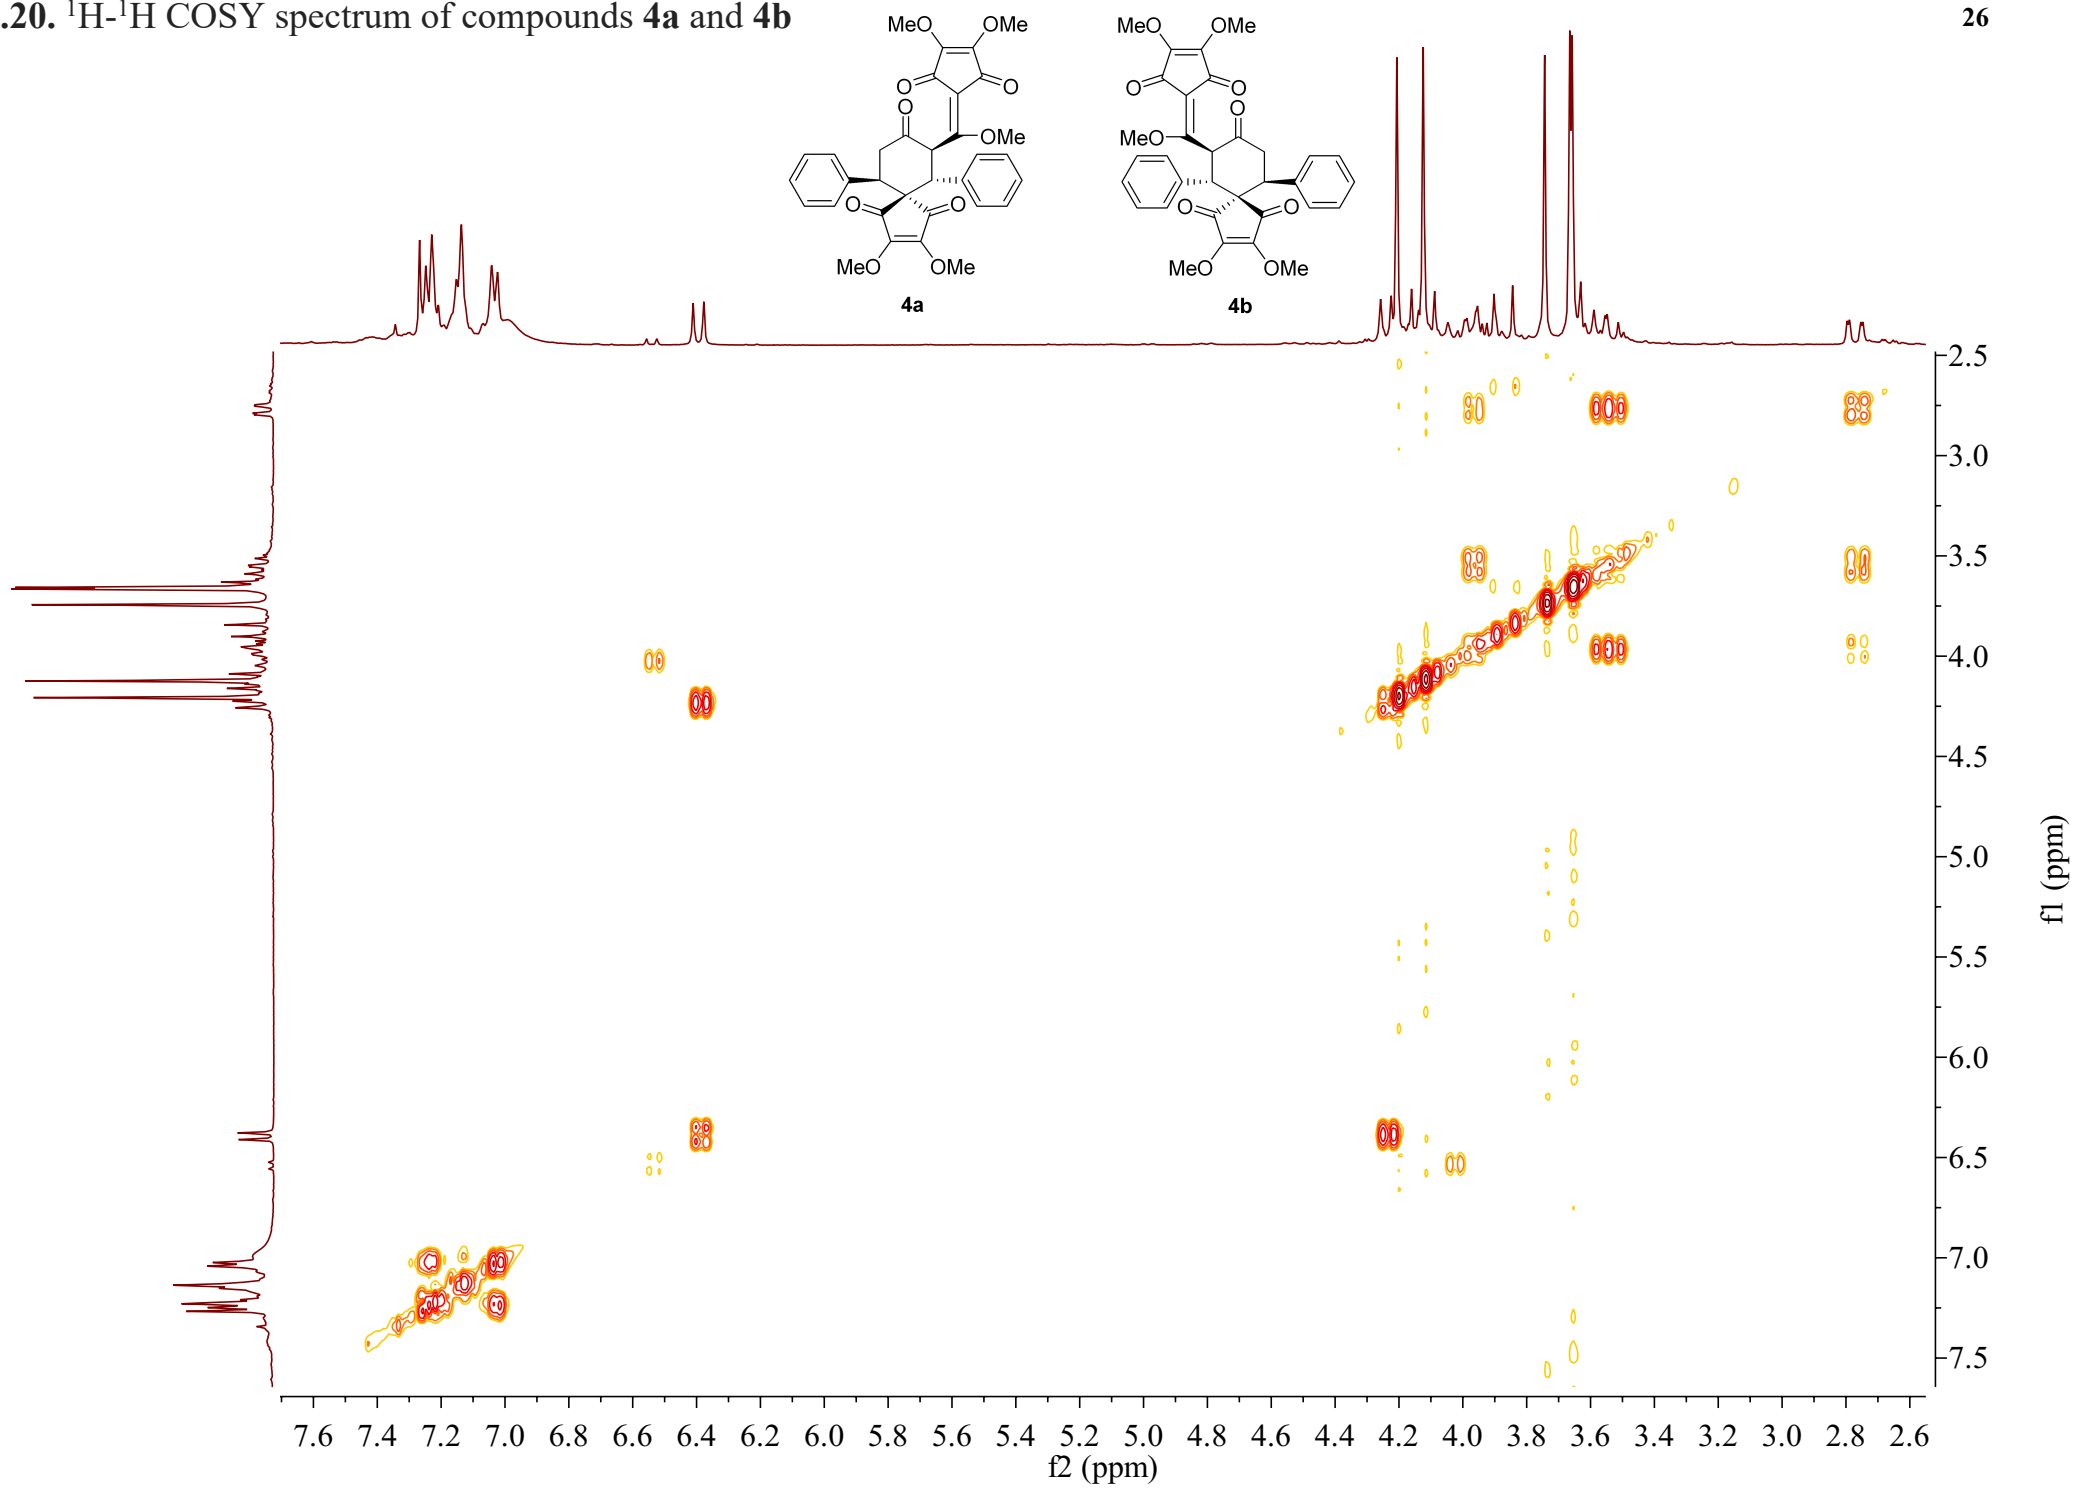

## S2.21. HMBC spectrum of compounds **4a** and **4b**

27

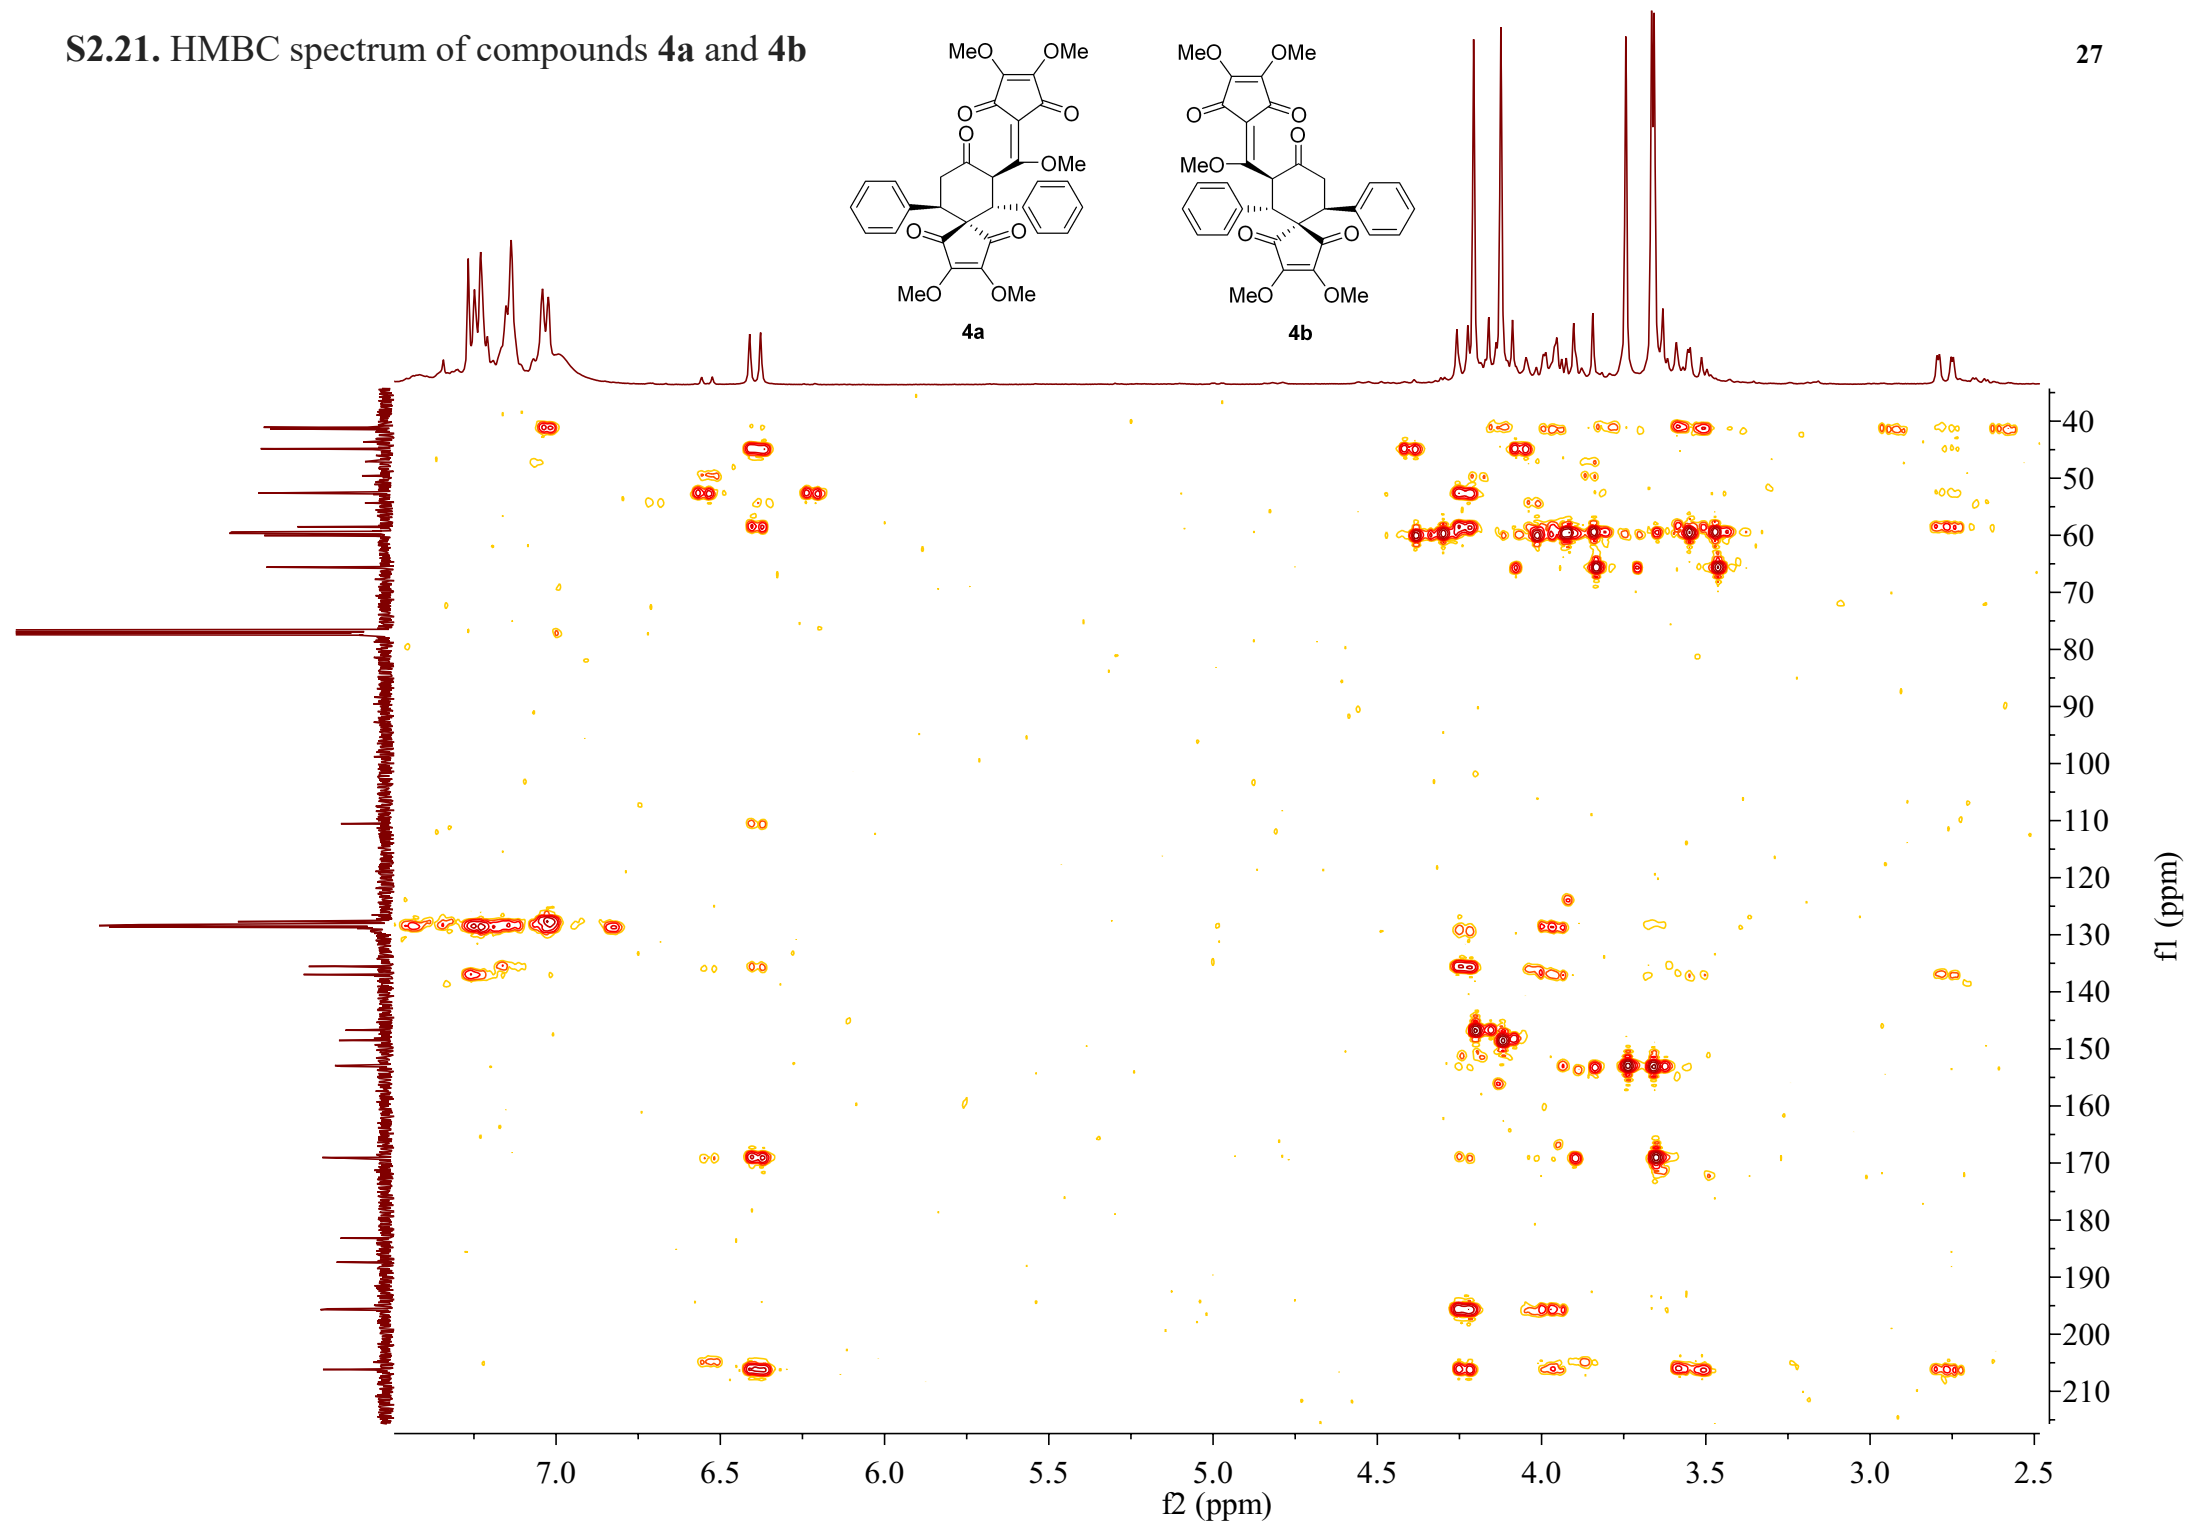

## S2.22. NOESY spectrum of compounds 4a and 4b

28

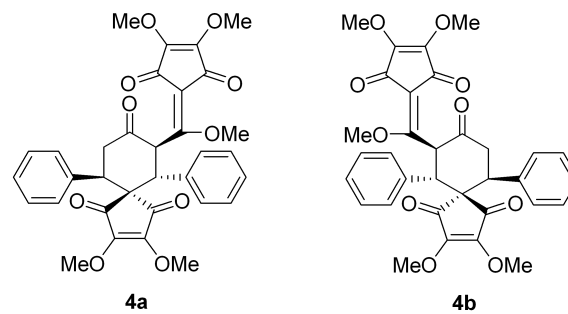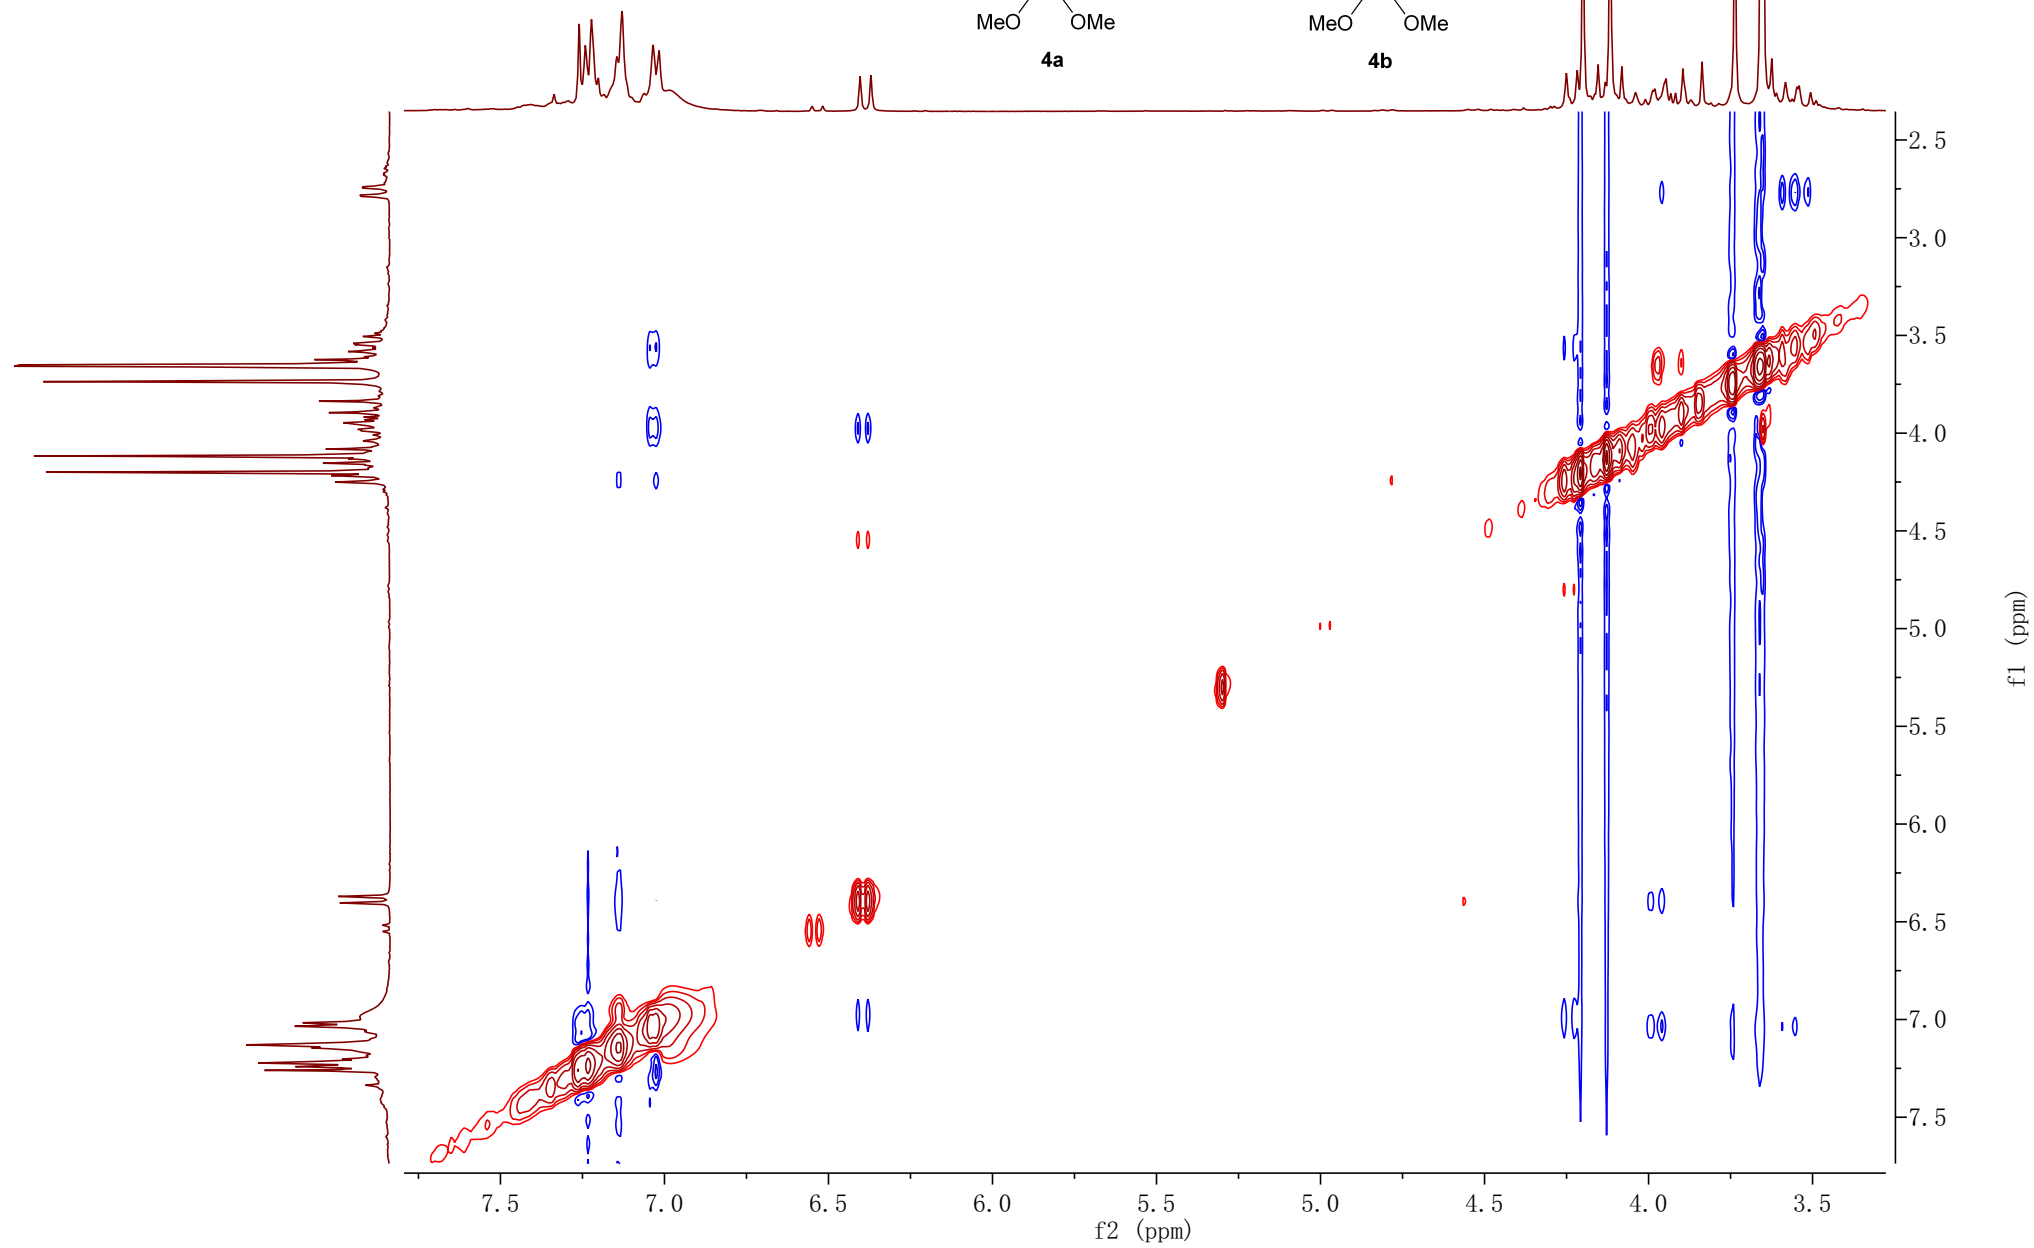



7.3646  
7.3486  
7.3305  
7.3074  
7.2866  
7.2659  
7.0394  
7.0318  
6.9851

5.9093  
5.8804

4.8396  
4.8268

4.1433  
4.1044  
4.0802  
4.0411

3.8307  
3.8017  
3.7290  
3.6640  
3.6510  
3.5761

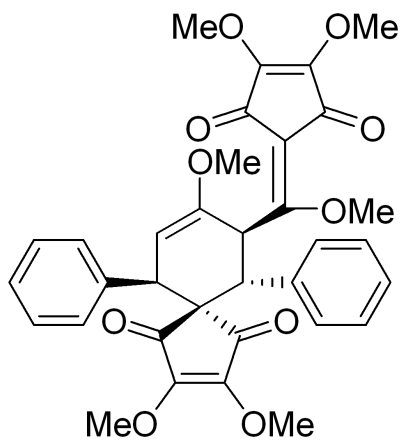

5

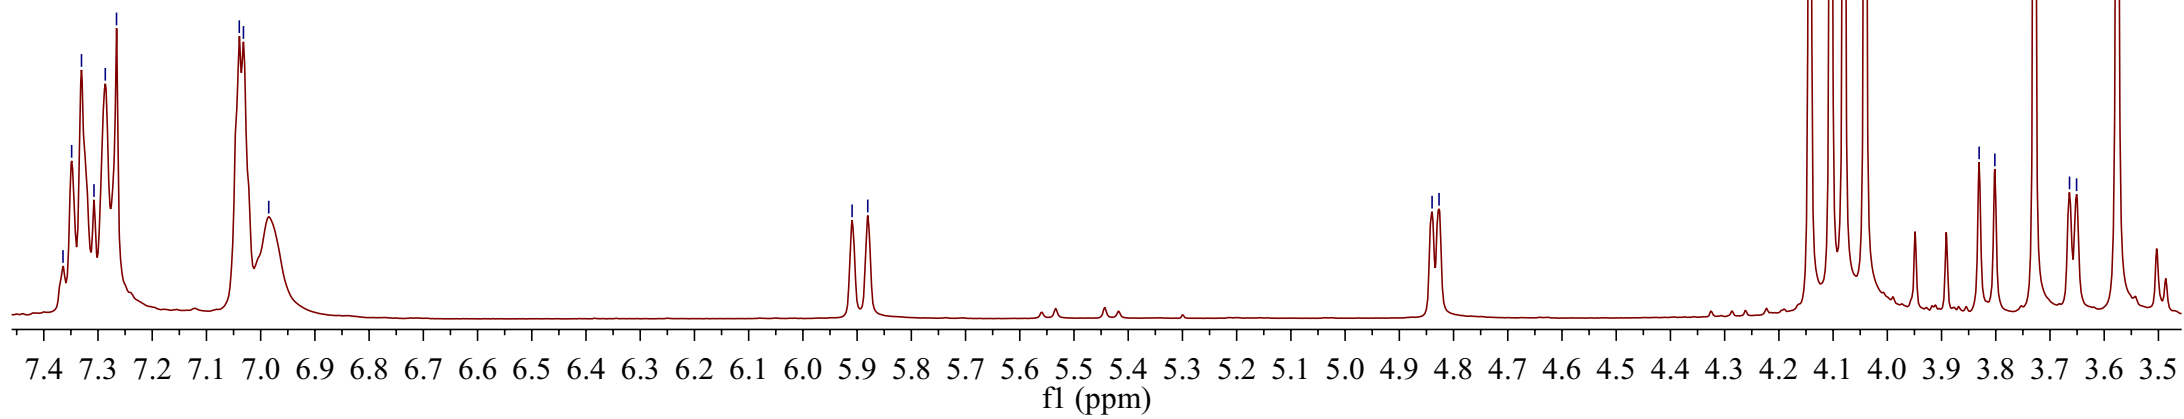

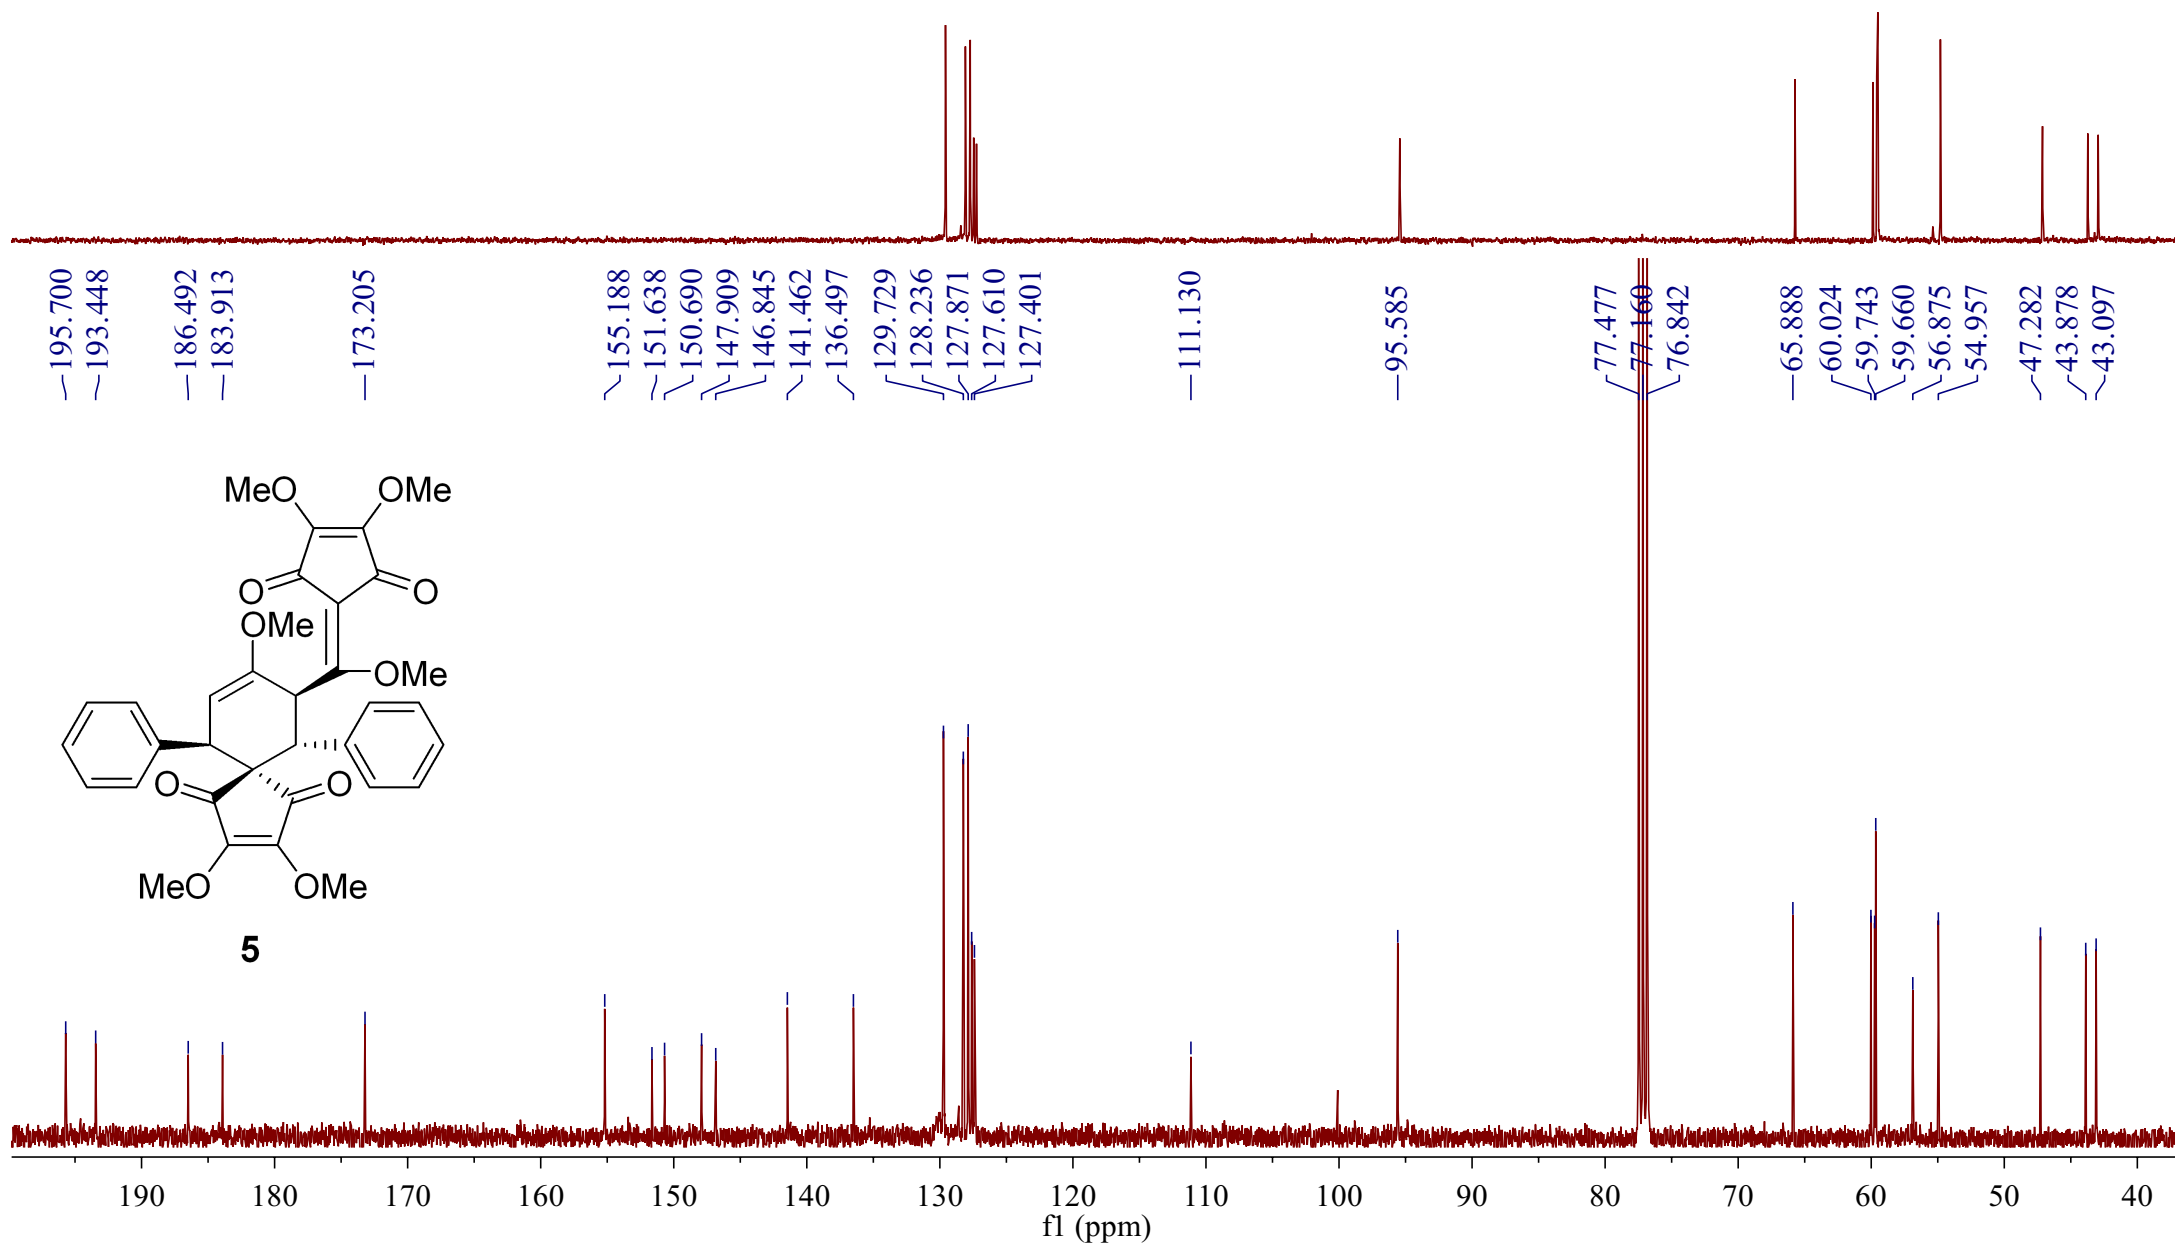

S2.25. <sup>1</sup>H NMR spectrum of compound 6

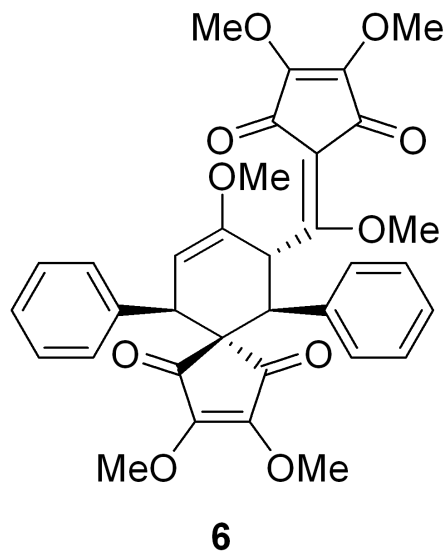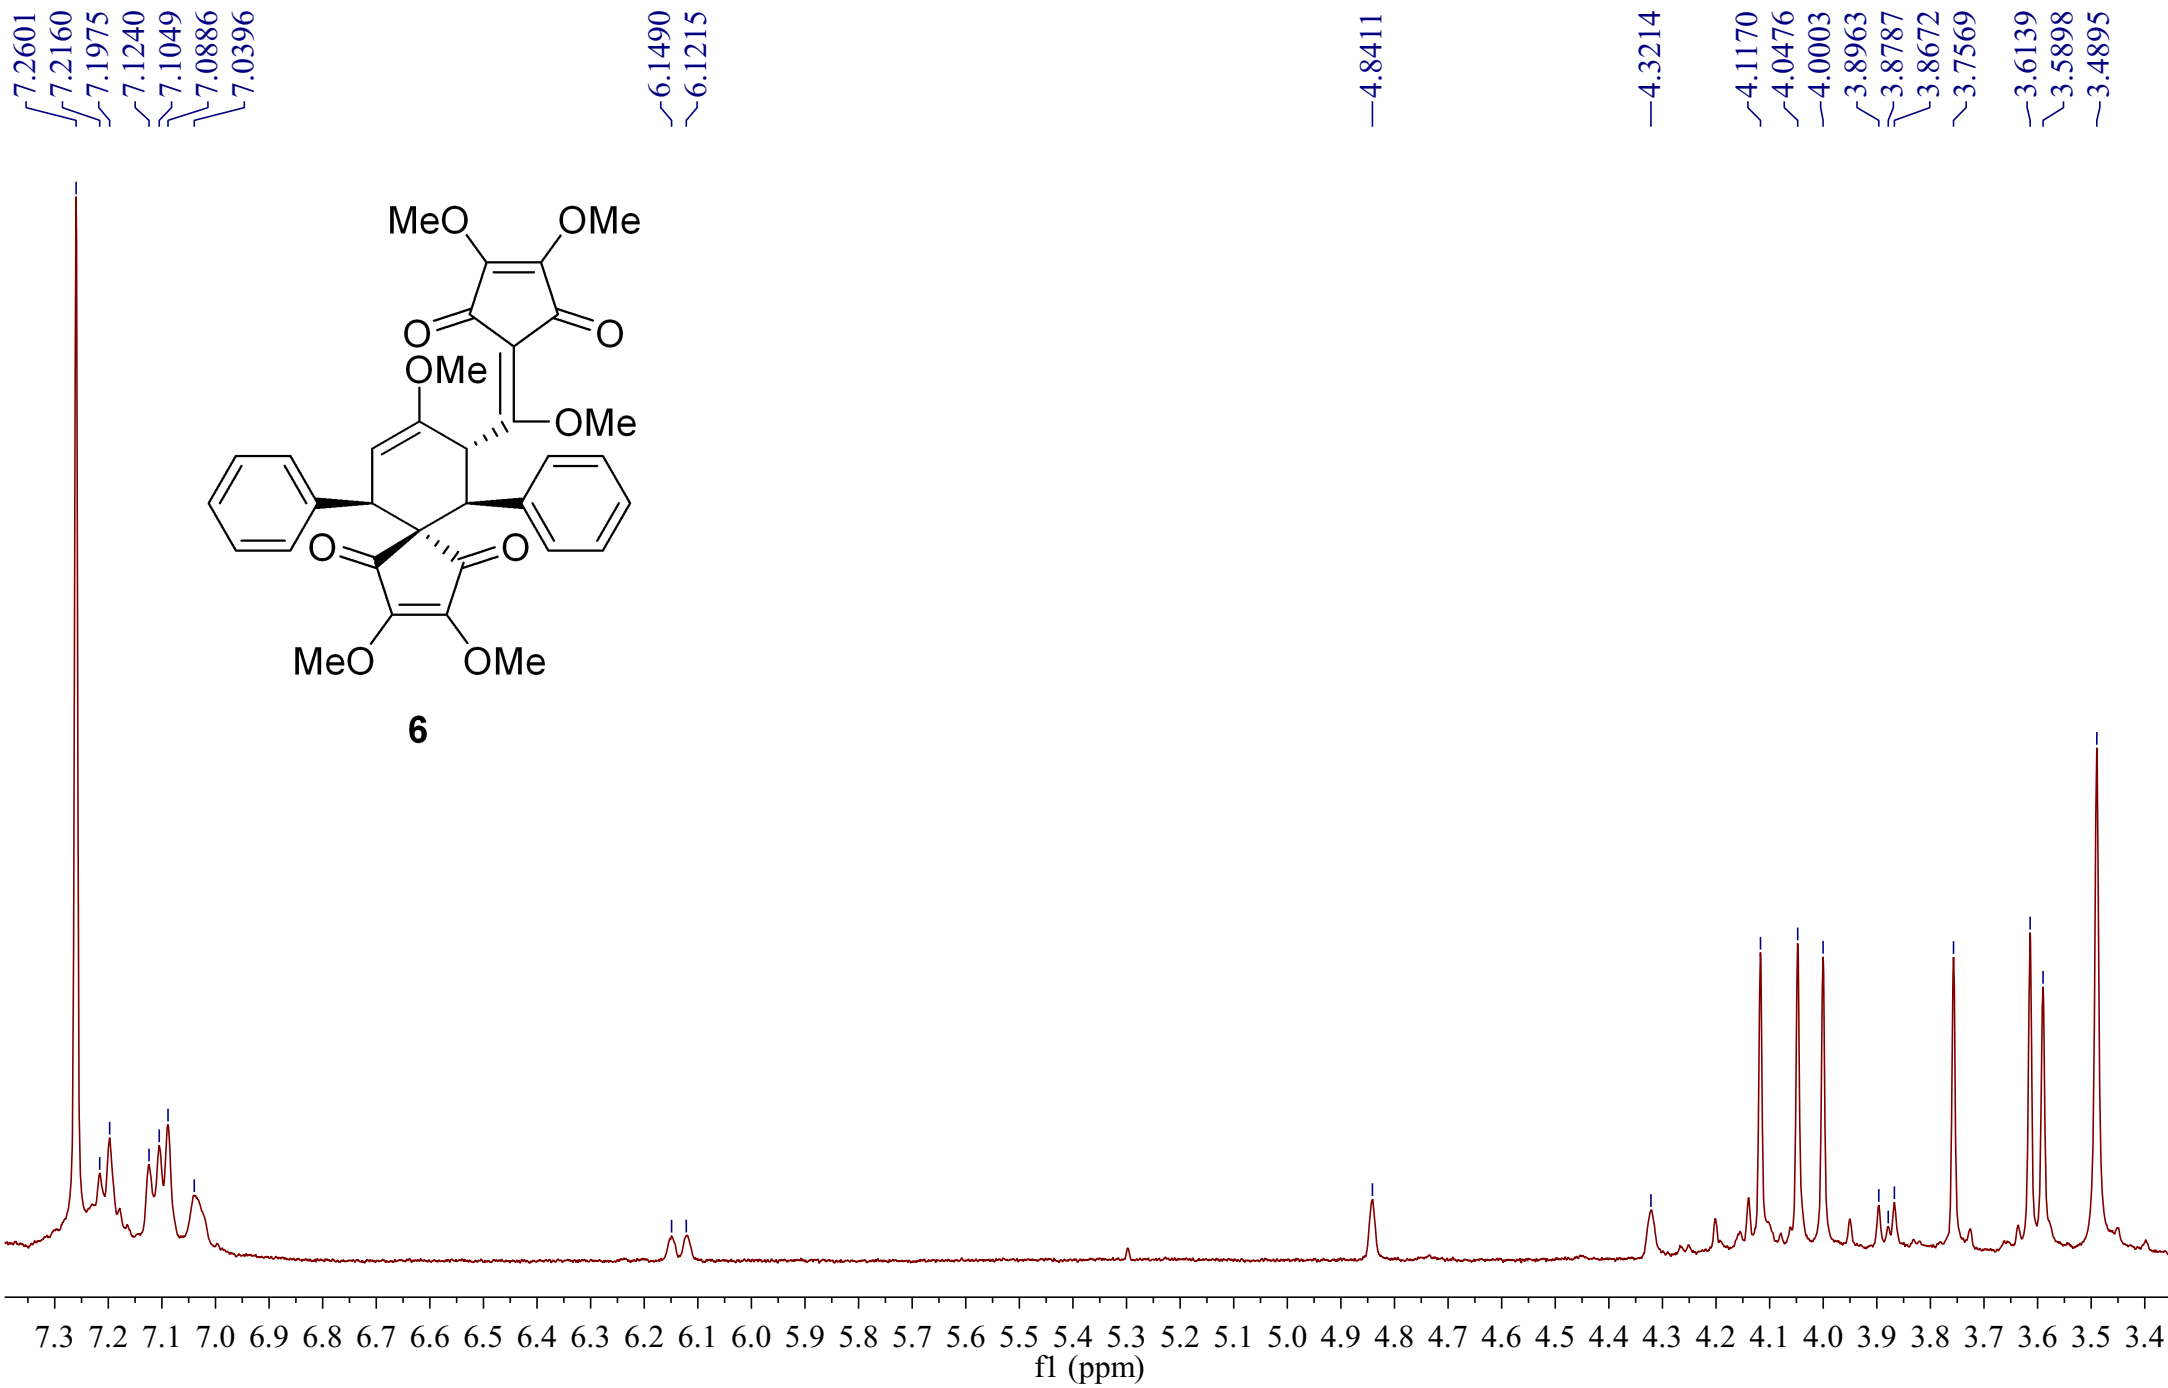

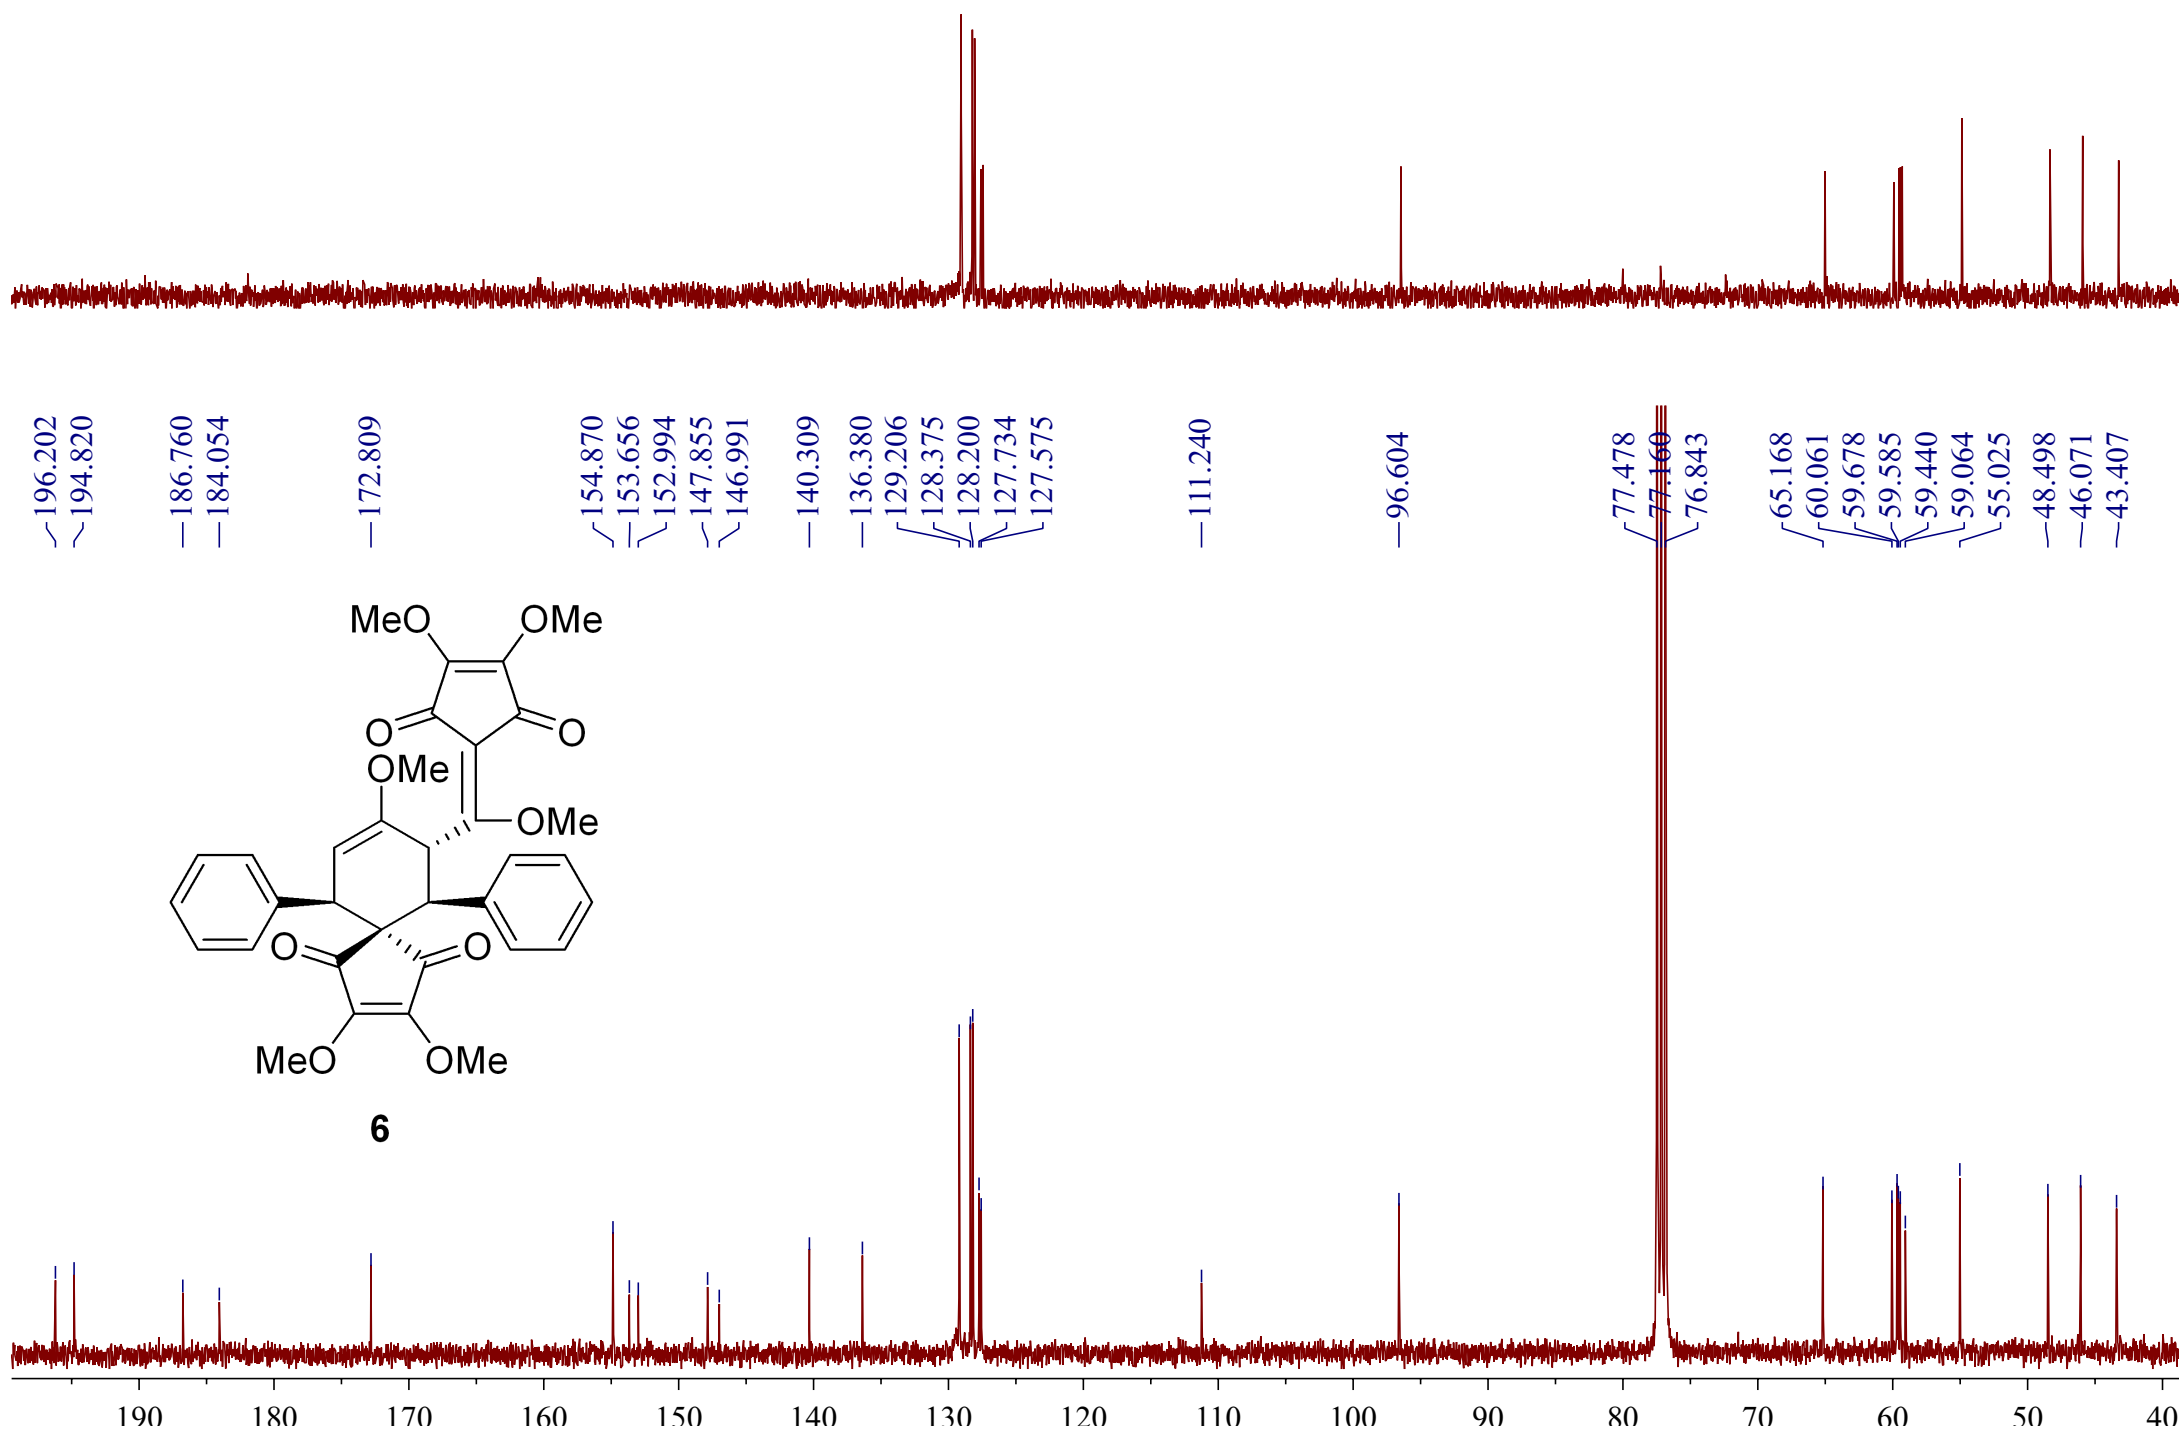

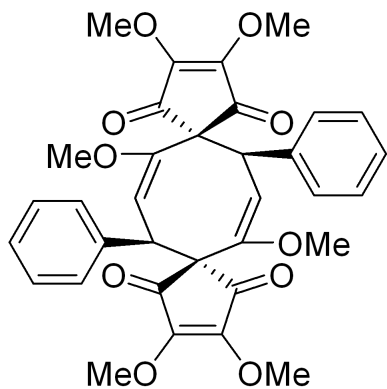

7

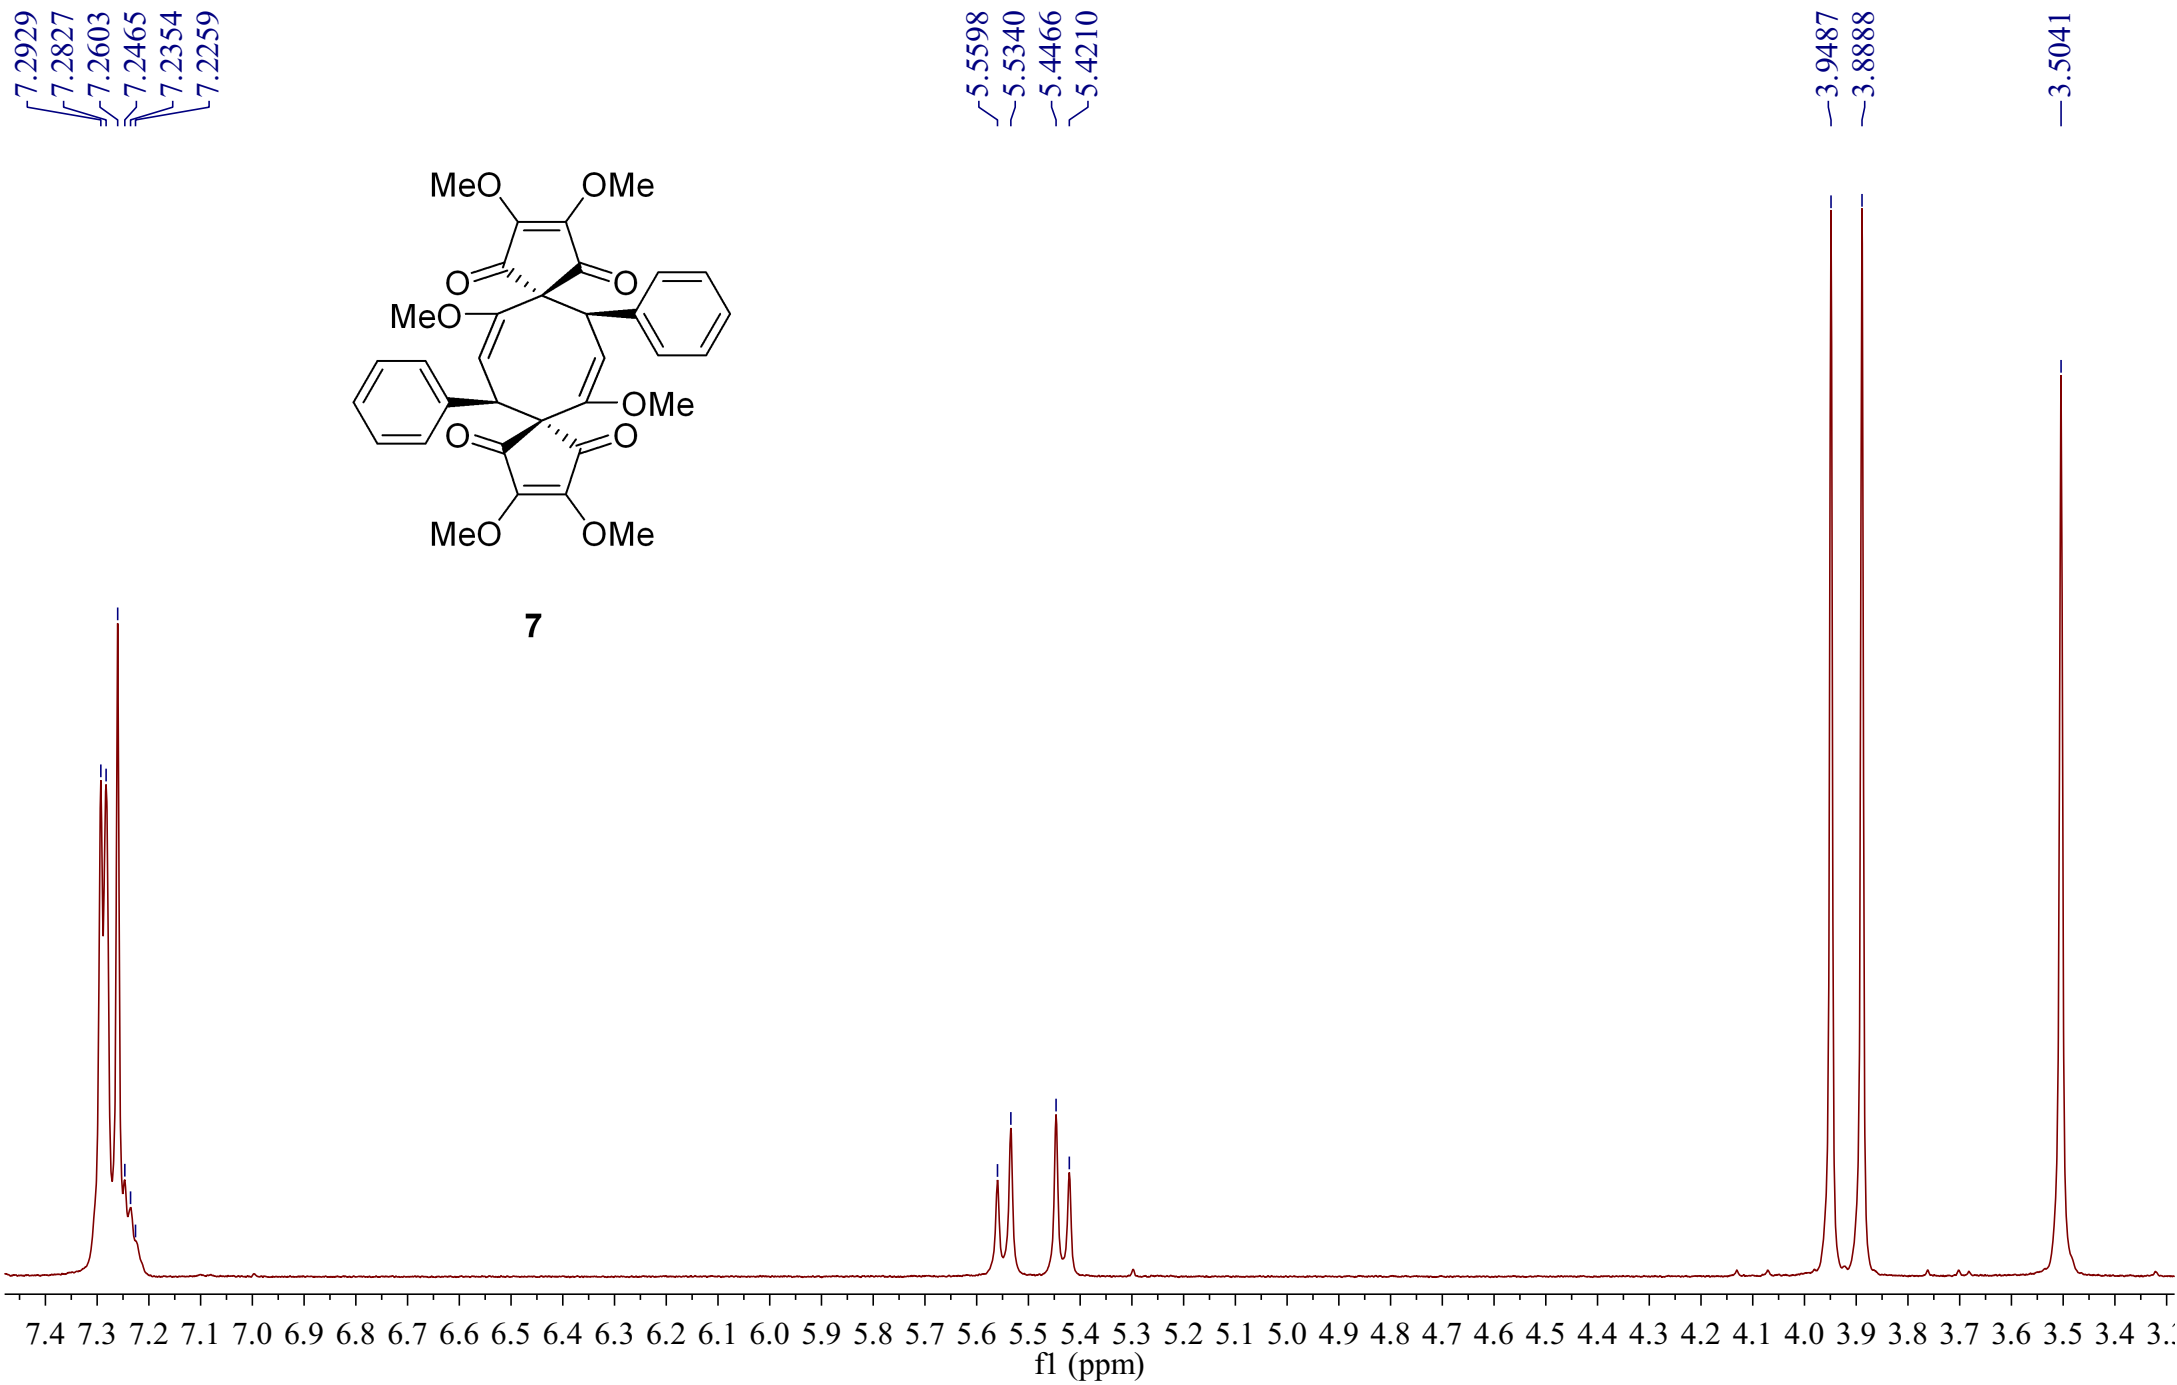

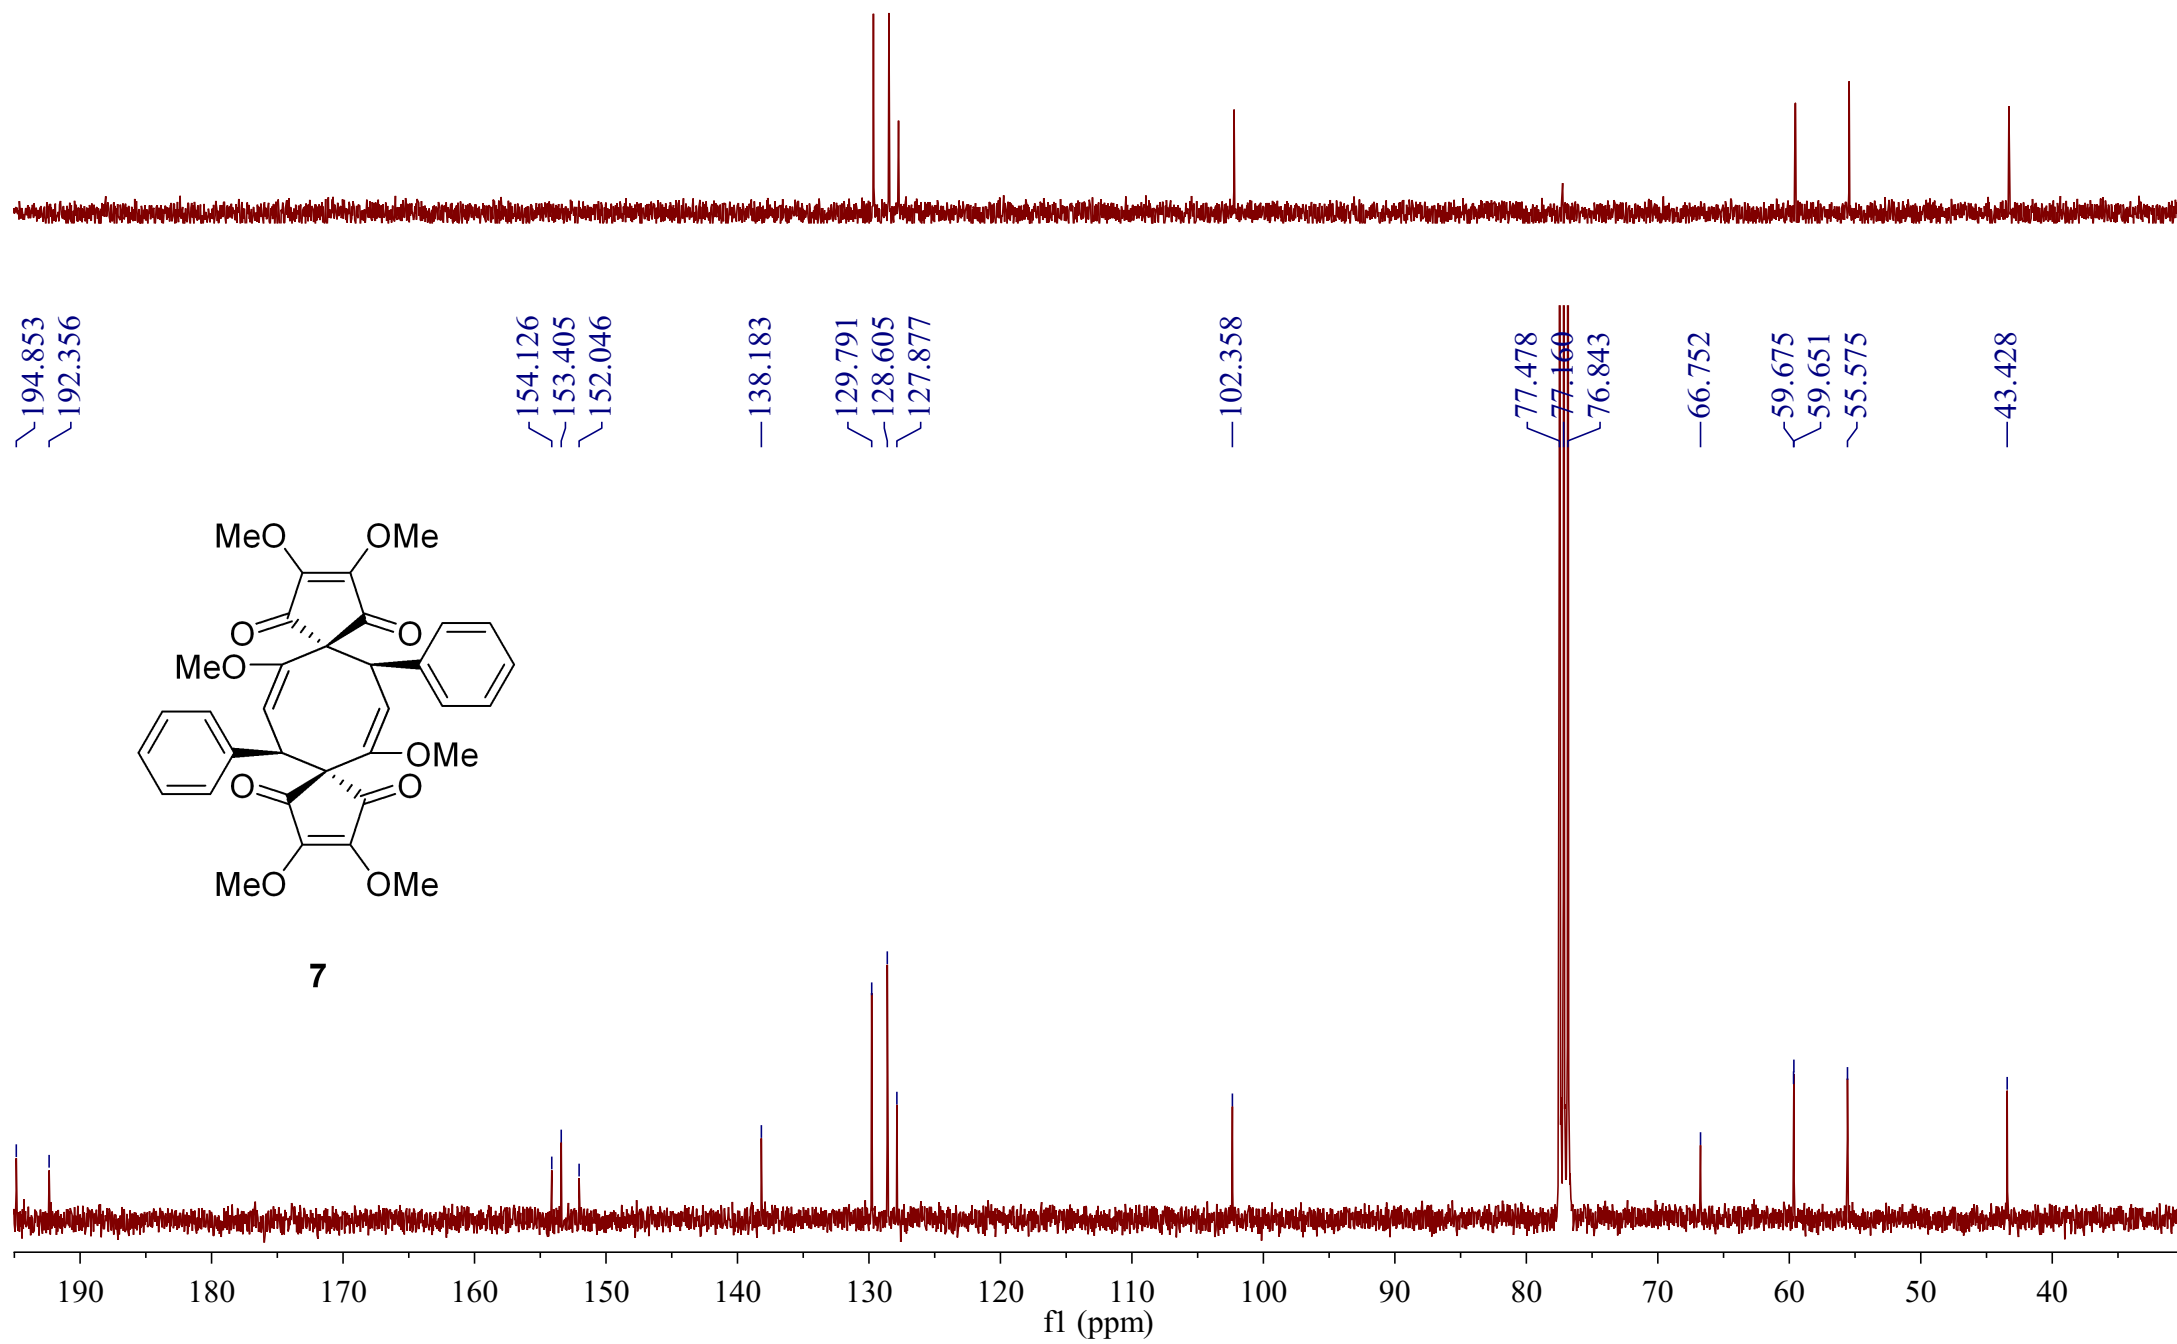

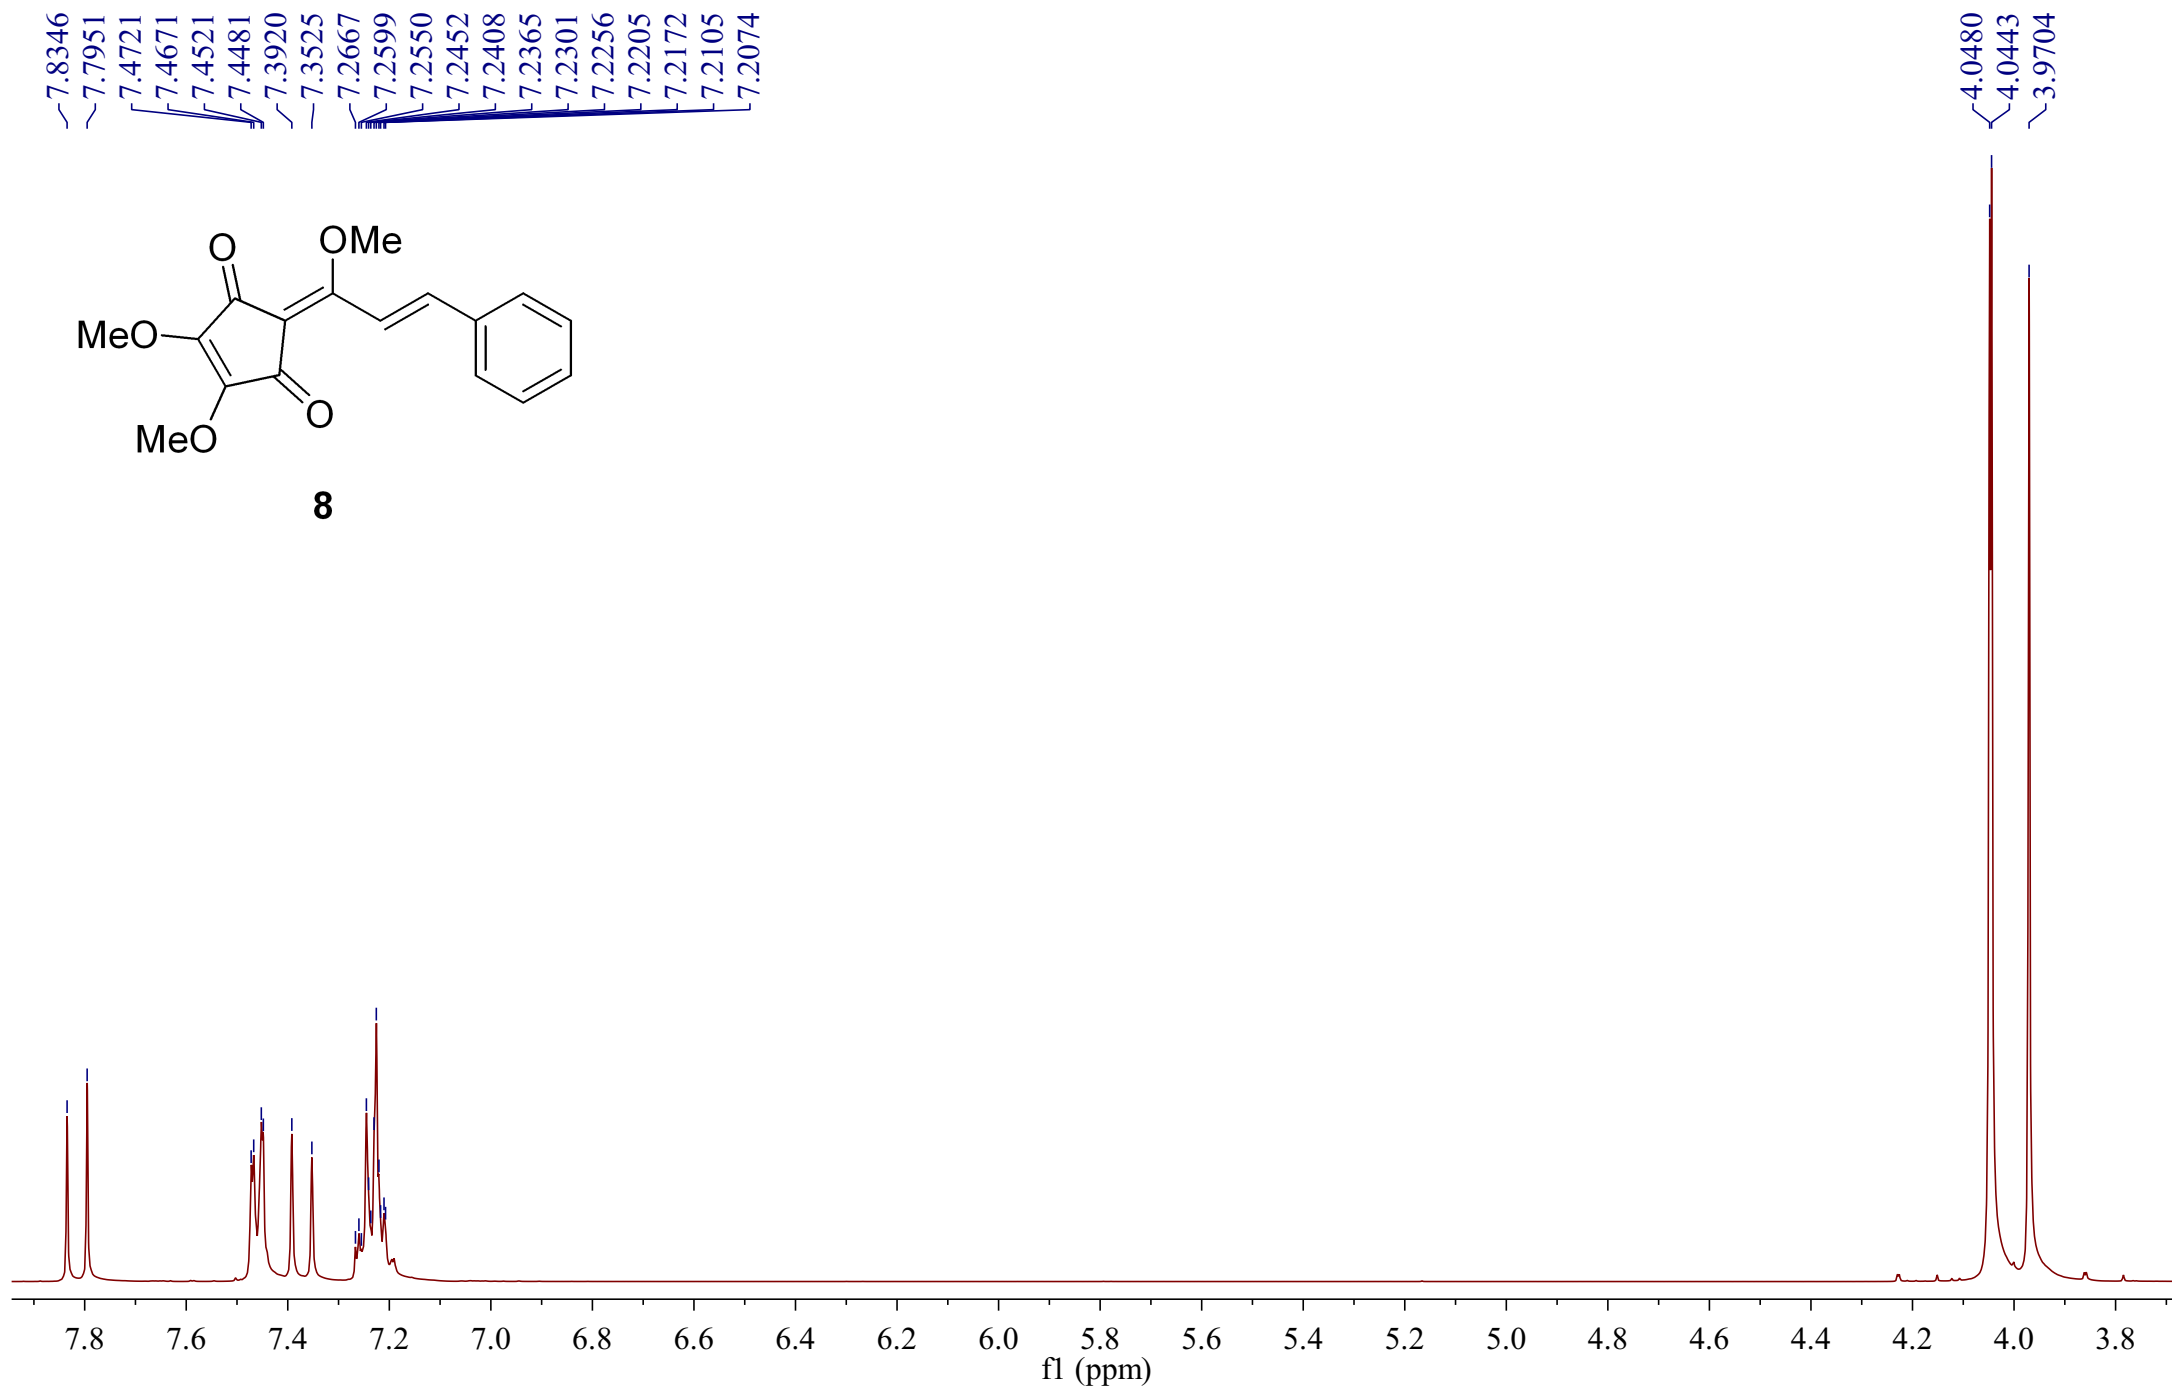

S2.30.  $^{13}\text{C}$  NMR and DEPT spectra of compound **8**

36

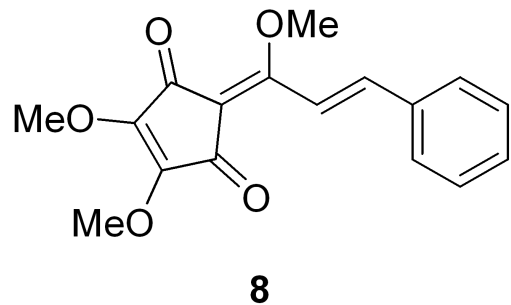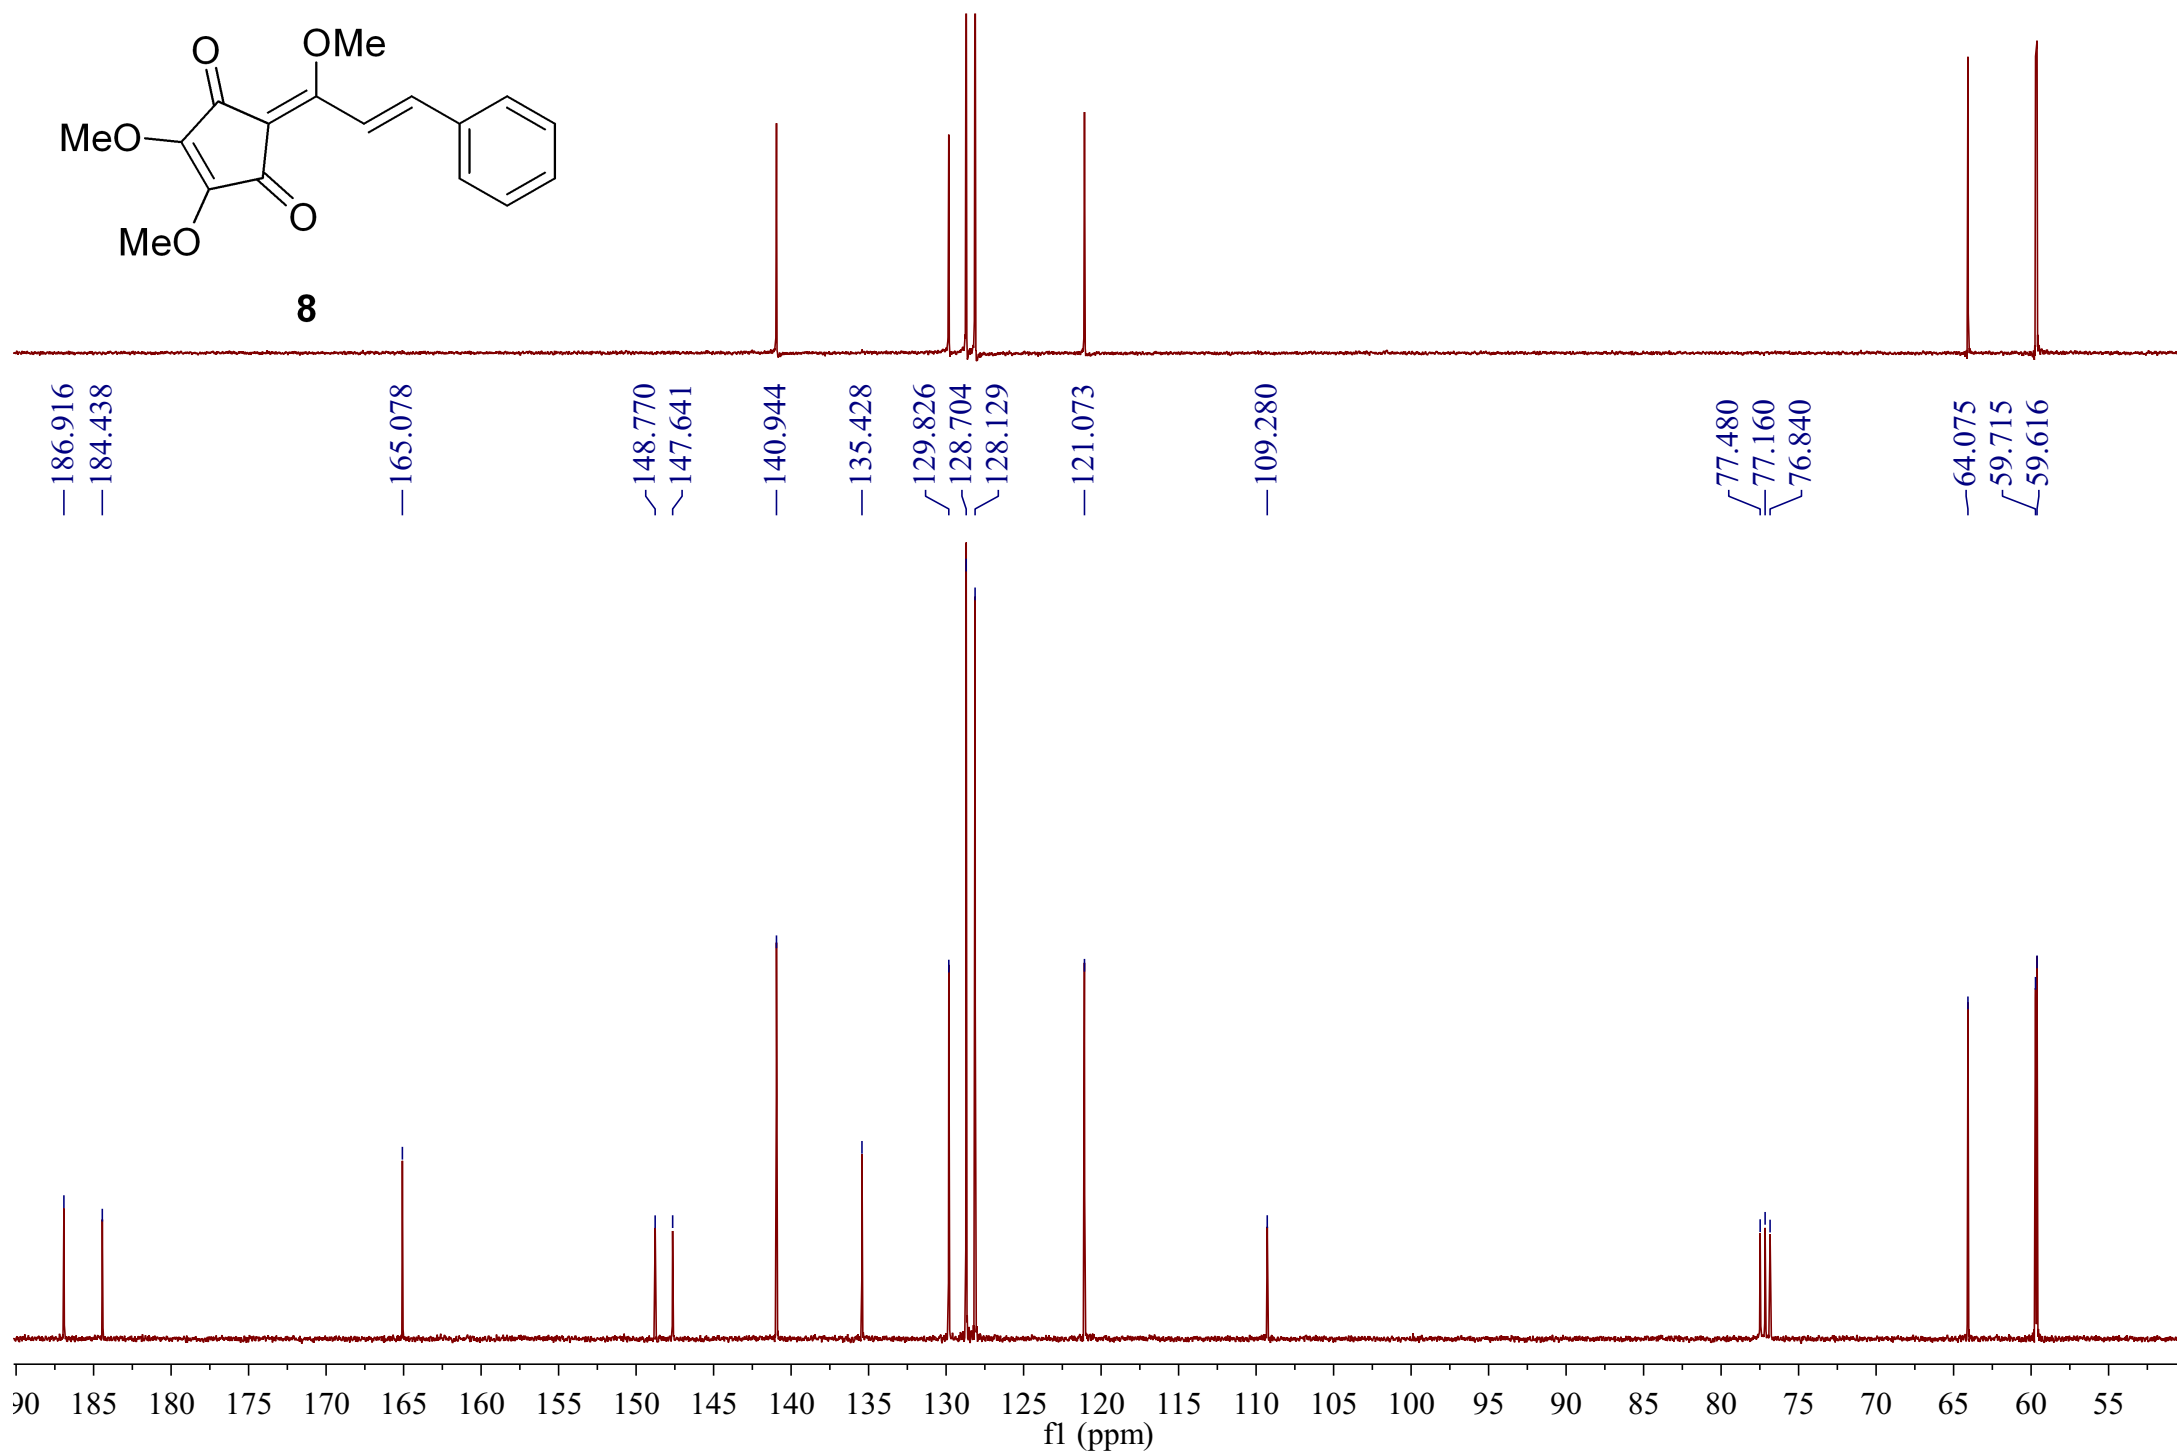



S2.31. <sup>1</sup>H NMR spectrum of compounds **9a** and **9b**

8.0155  
7.9760  
7.9423  
7.9028  
7.6256  
7.6078  
7.5880  
7.3957  
7.3809  
7.2596

5.9362  
5.9253

4.2060  
4.1942

3.9302  
3.9222

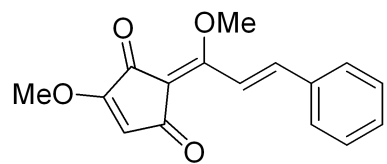

**9a**

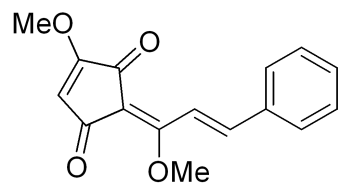

**9b**

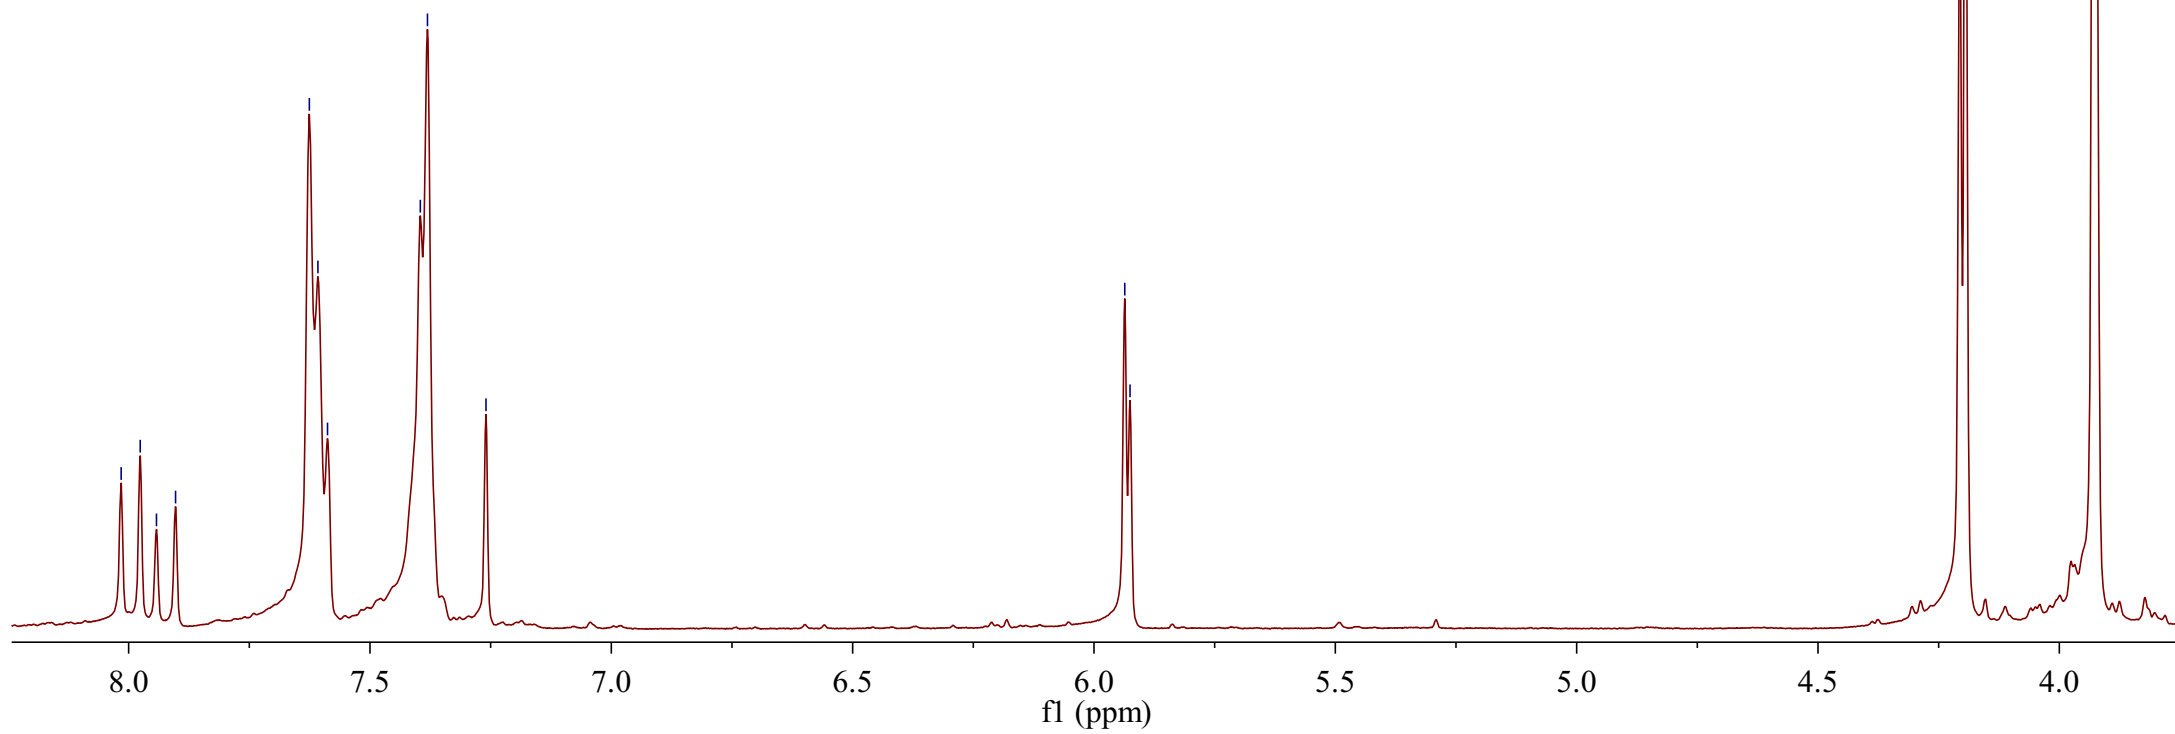

S2.32. <sup>13</sup>C NMR and DEPT spectra of compounds **9a** and **9b**

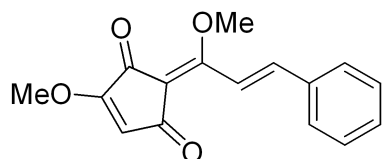

**9a**

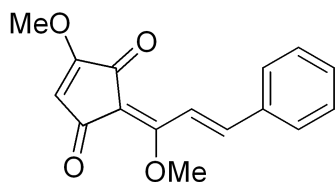

**9b**

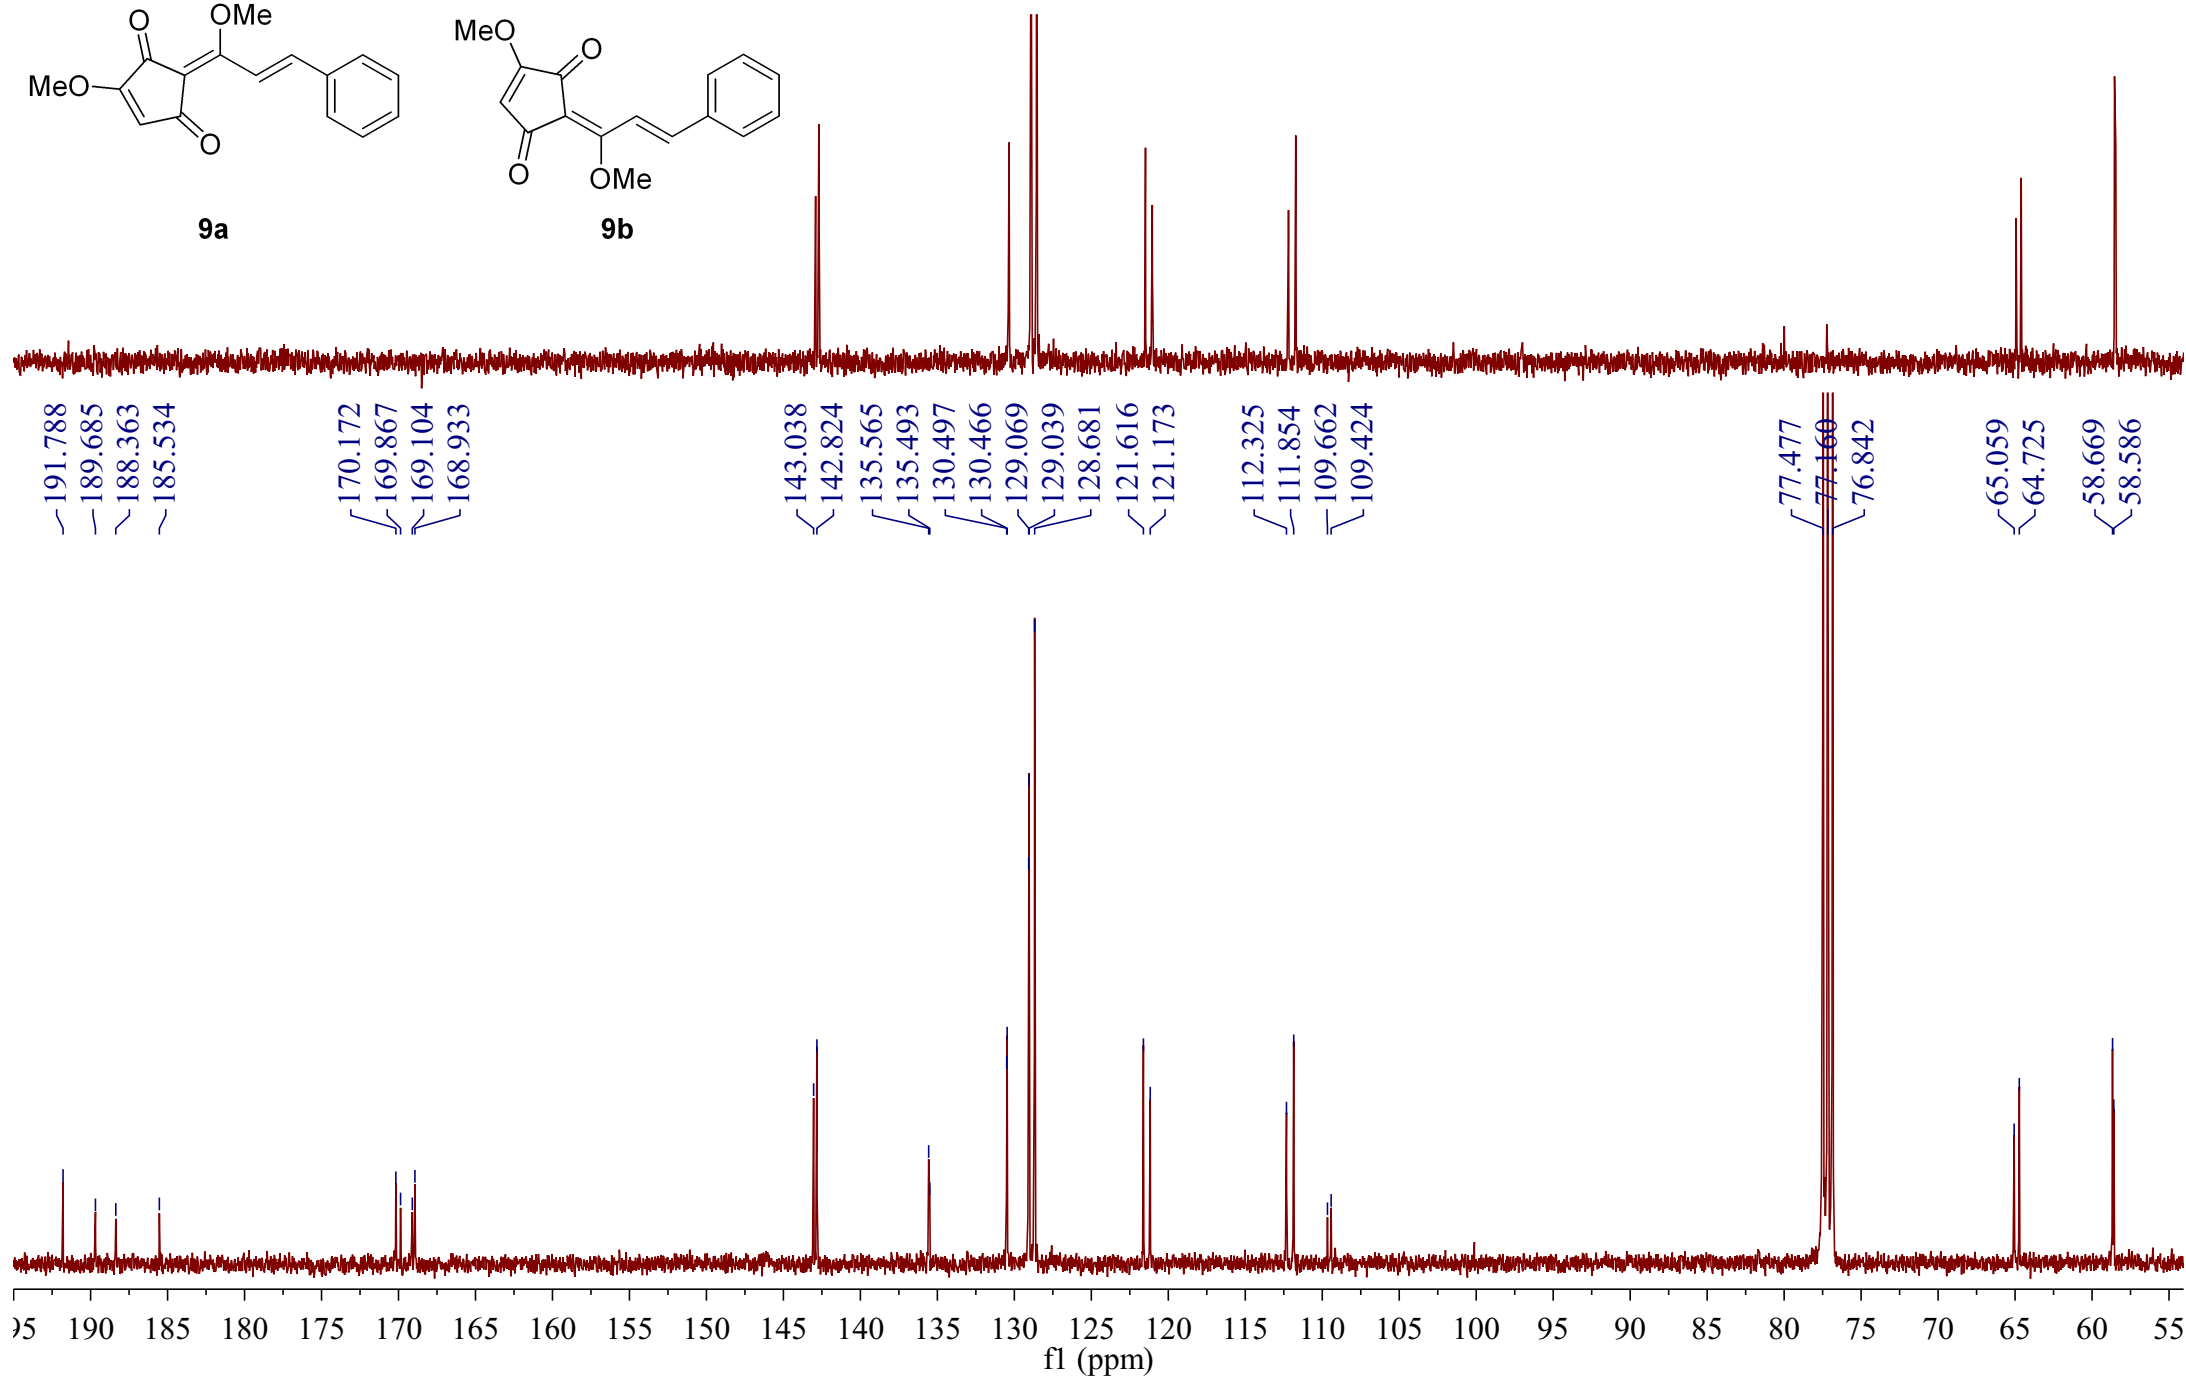

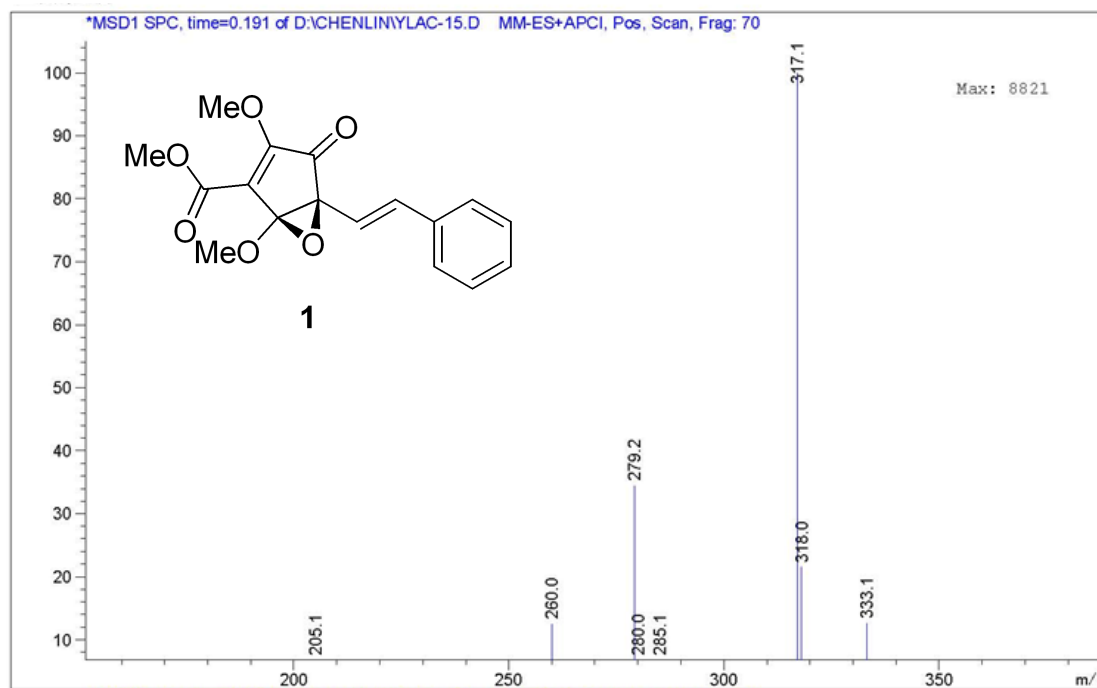

## S3.2. HR-ESI-MS data of compound 1

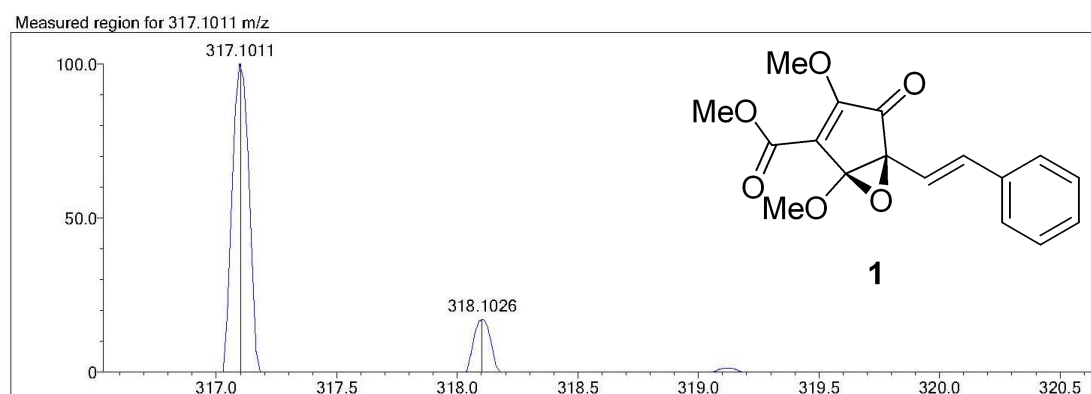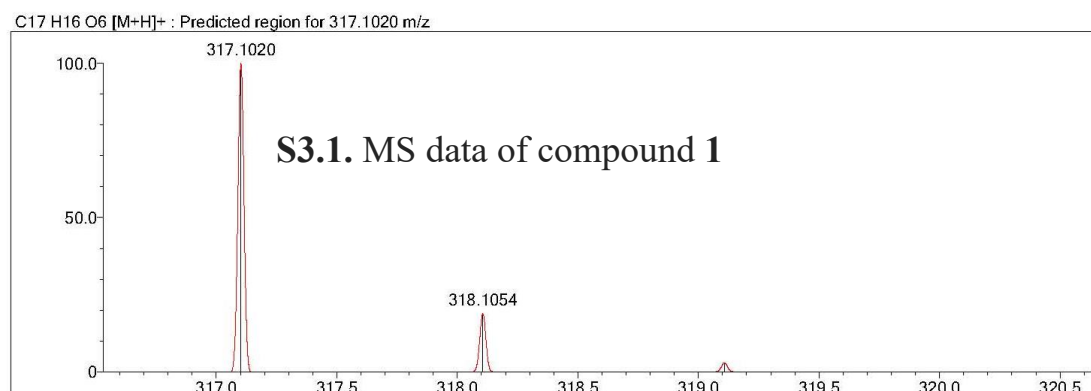

**S3.1. MS data of compound 1**

| Rank | Score | Formula (M) | Ion                | Meas. m/z | Pred. m/z | Df. (mDa) | Df. (ppm) | Iso   | DBE  |
|------|-------|-------------|--------------------|-----------|-----------|-----------|-----------|-------|------|
| 4    | 74.42 | C17 H16 O6  | [M+H] <sup>+</sup> | 317.1011  | 317.1020  | -0.9      | -2.84     | 78.01 | 10.0 |

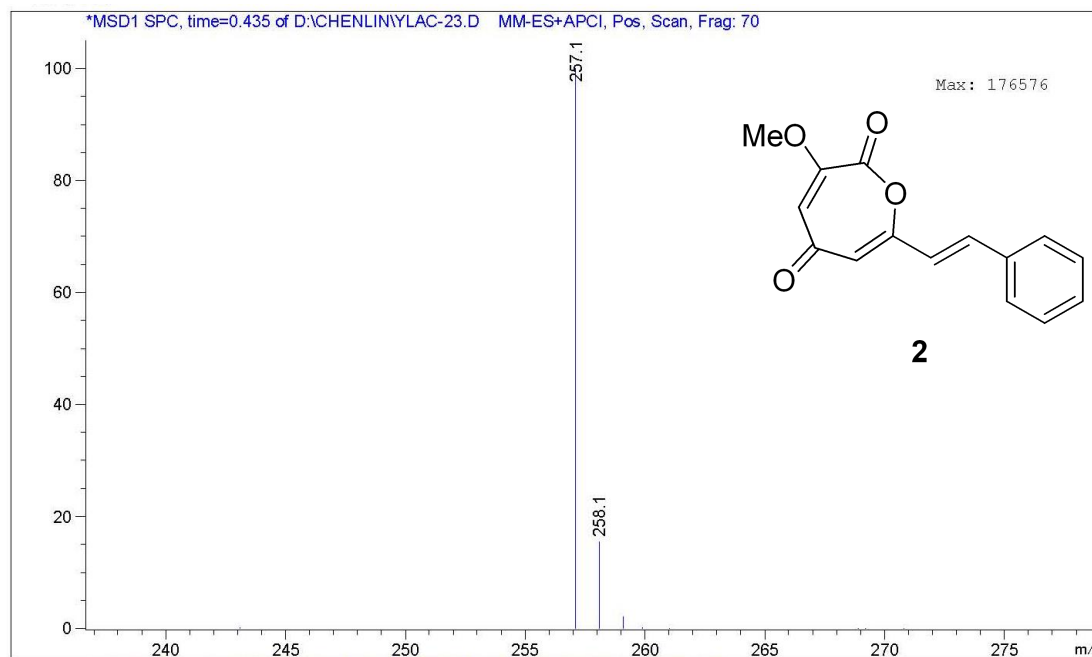

## S3.4. HR-ESI-MS data of compound 2

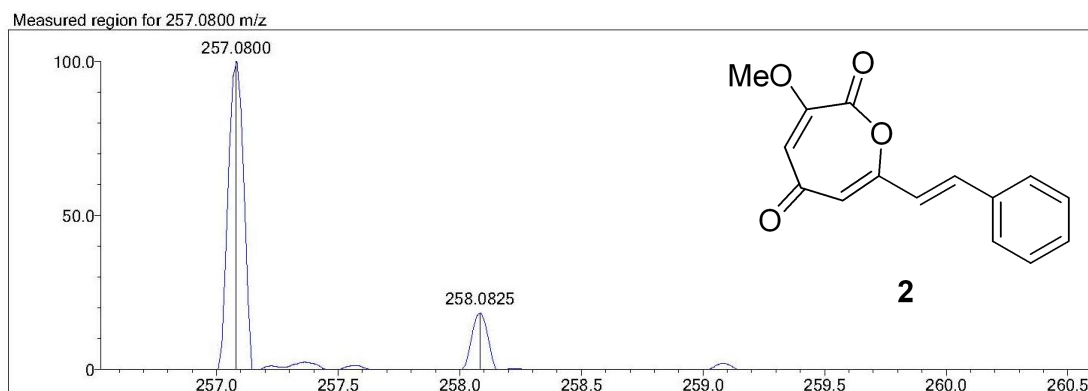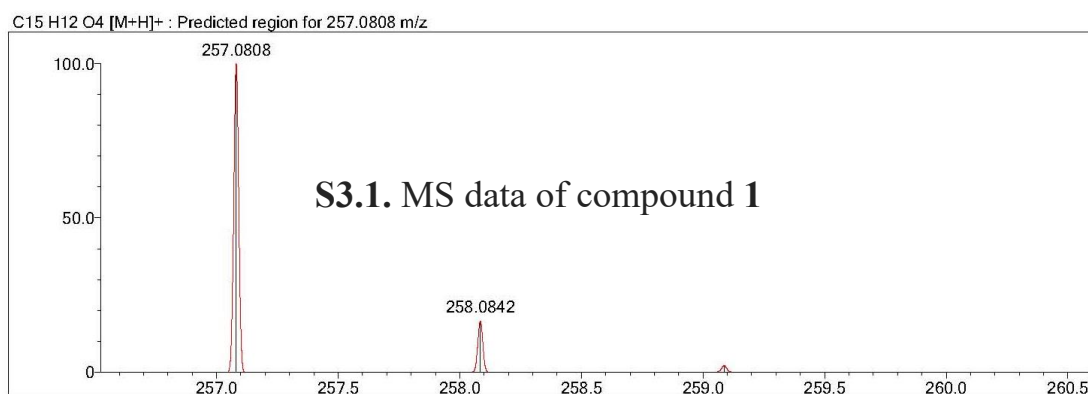

## S3.1. MS data of compound 1

| Rank | Score | Formula (M) | Ion                | Meas. m/z | Pred. m/z | Df. (mDa) | Df. (ppm) | Iso   | DBE  |
|------|-------|-------------|--------------------|-----------|-----------|-----------|-----------|-------|------|
| 2    | 68.62 | C15 H12 O4  | [M+H] <sup>+</sup> | 257.0800  | 257.0808  | -0.8      | -3.11     | 72.44 | 10.0 |

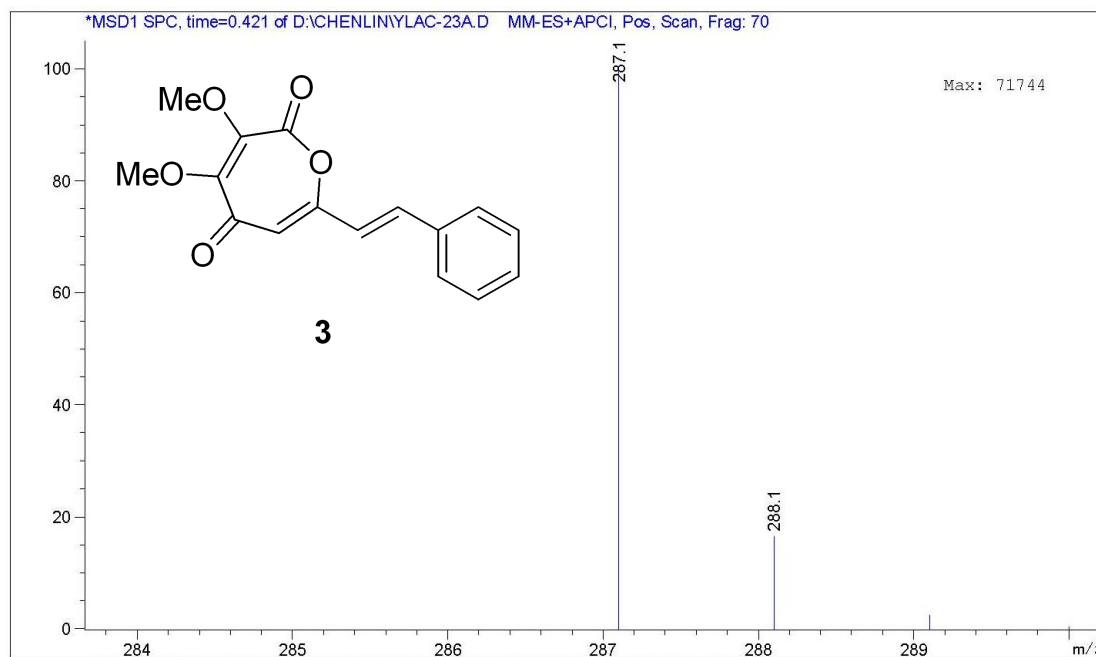

## S3.6. HR-ESI-MS data of compound 3

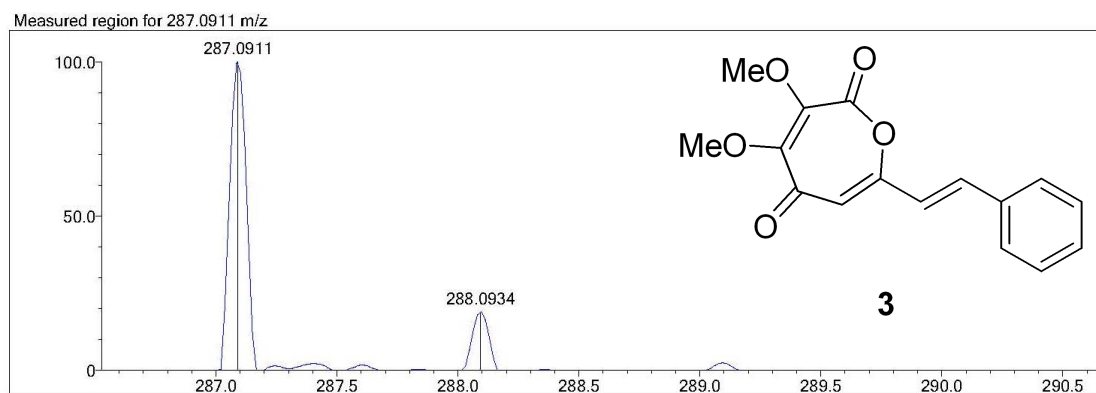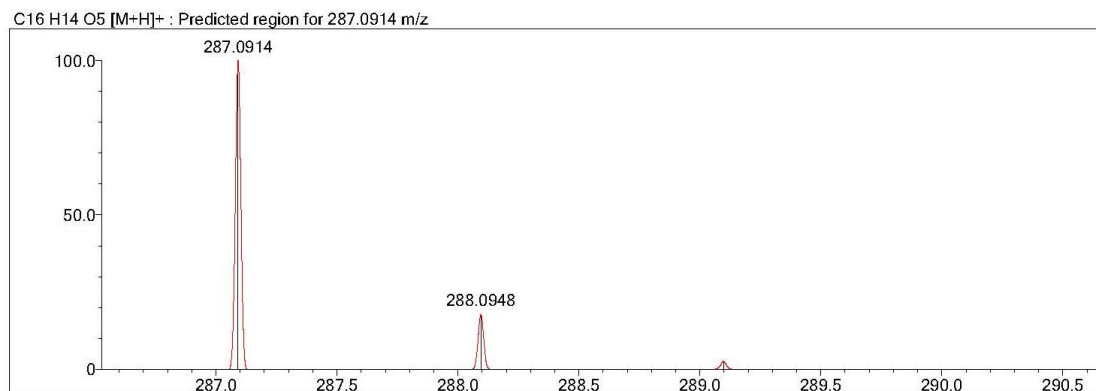

| Rank | Score | Formula (M) | Ion                | Meas. m/z | Pred. m/z | Df. (mDa) | Df. (ppm) | Iso   | DBE  |
|------|-------|-------------|--------------------|-----------|-----------|-----------|-----------|-------|------|
| 1    | 75.35 | C16 H14 O5  | [M+H] <sup>+</sup> | 287.0911  | 287.0914  | -0.3      | -1.04     | 75.43 | 10.0 |

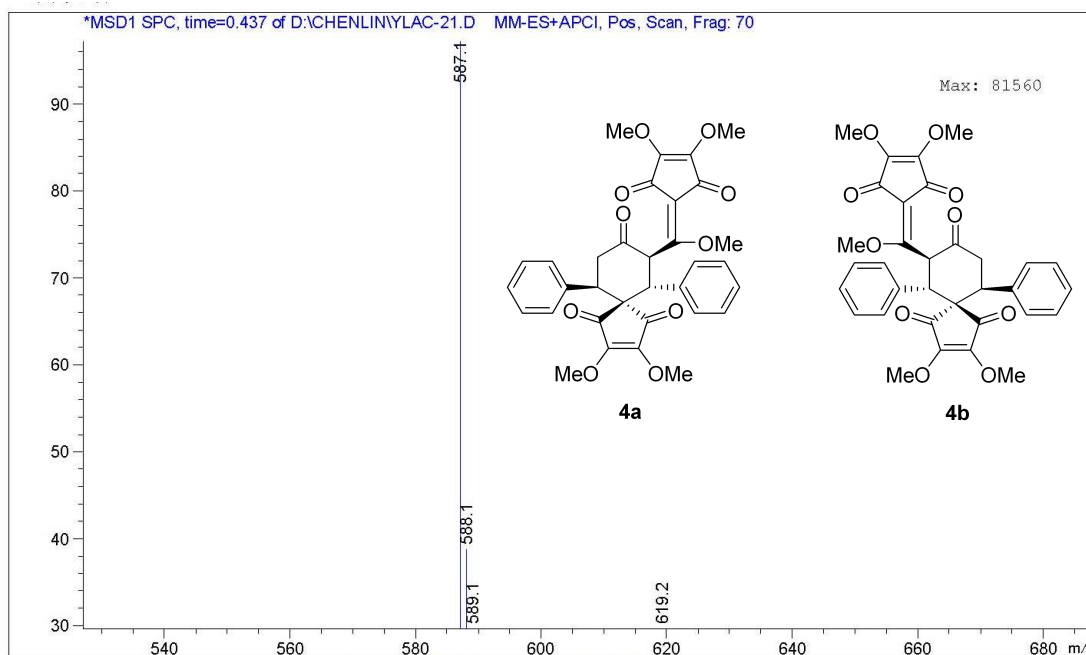S3.8. HR-ESI-MS data of compounds **4a** and **4b**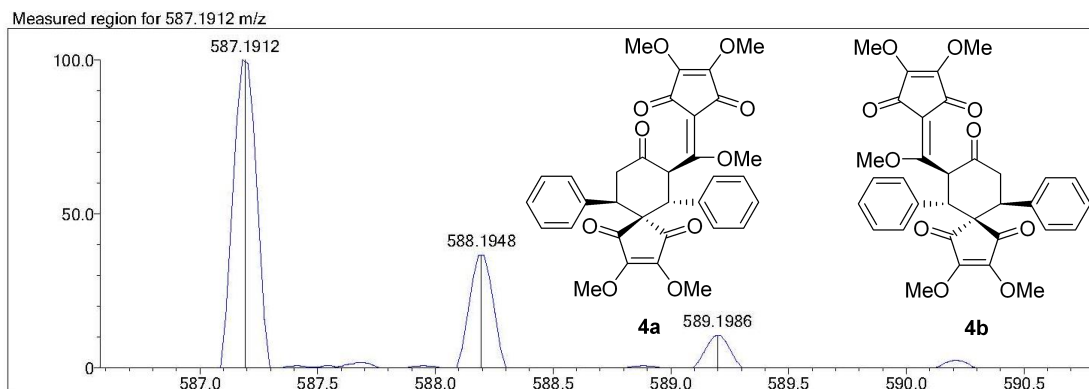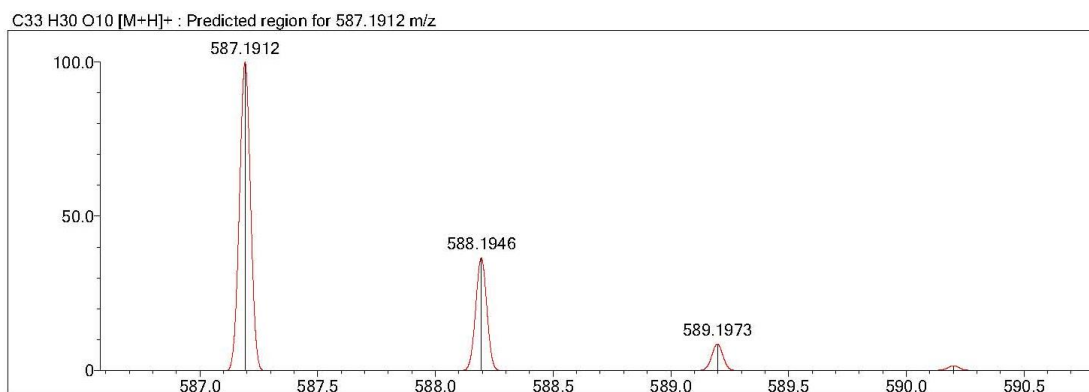

| Rank | Score | Formula (M) | Ion                | Meas. m/z | Pred. m/z | Df. (mDa) | Df. (ppm) | Iso   | DBE  |
|------|-------|-------------|--------------------|-----------|-----------|-----------|-----------|-------|------|
| 1    | 93.82 | C33 H30 O10 | [M+H] <sup>+</sup> | 587.1912  | 587.1912  | 0.0       | 0.00      | 93.82 | 19.0 |

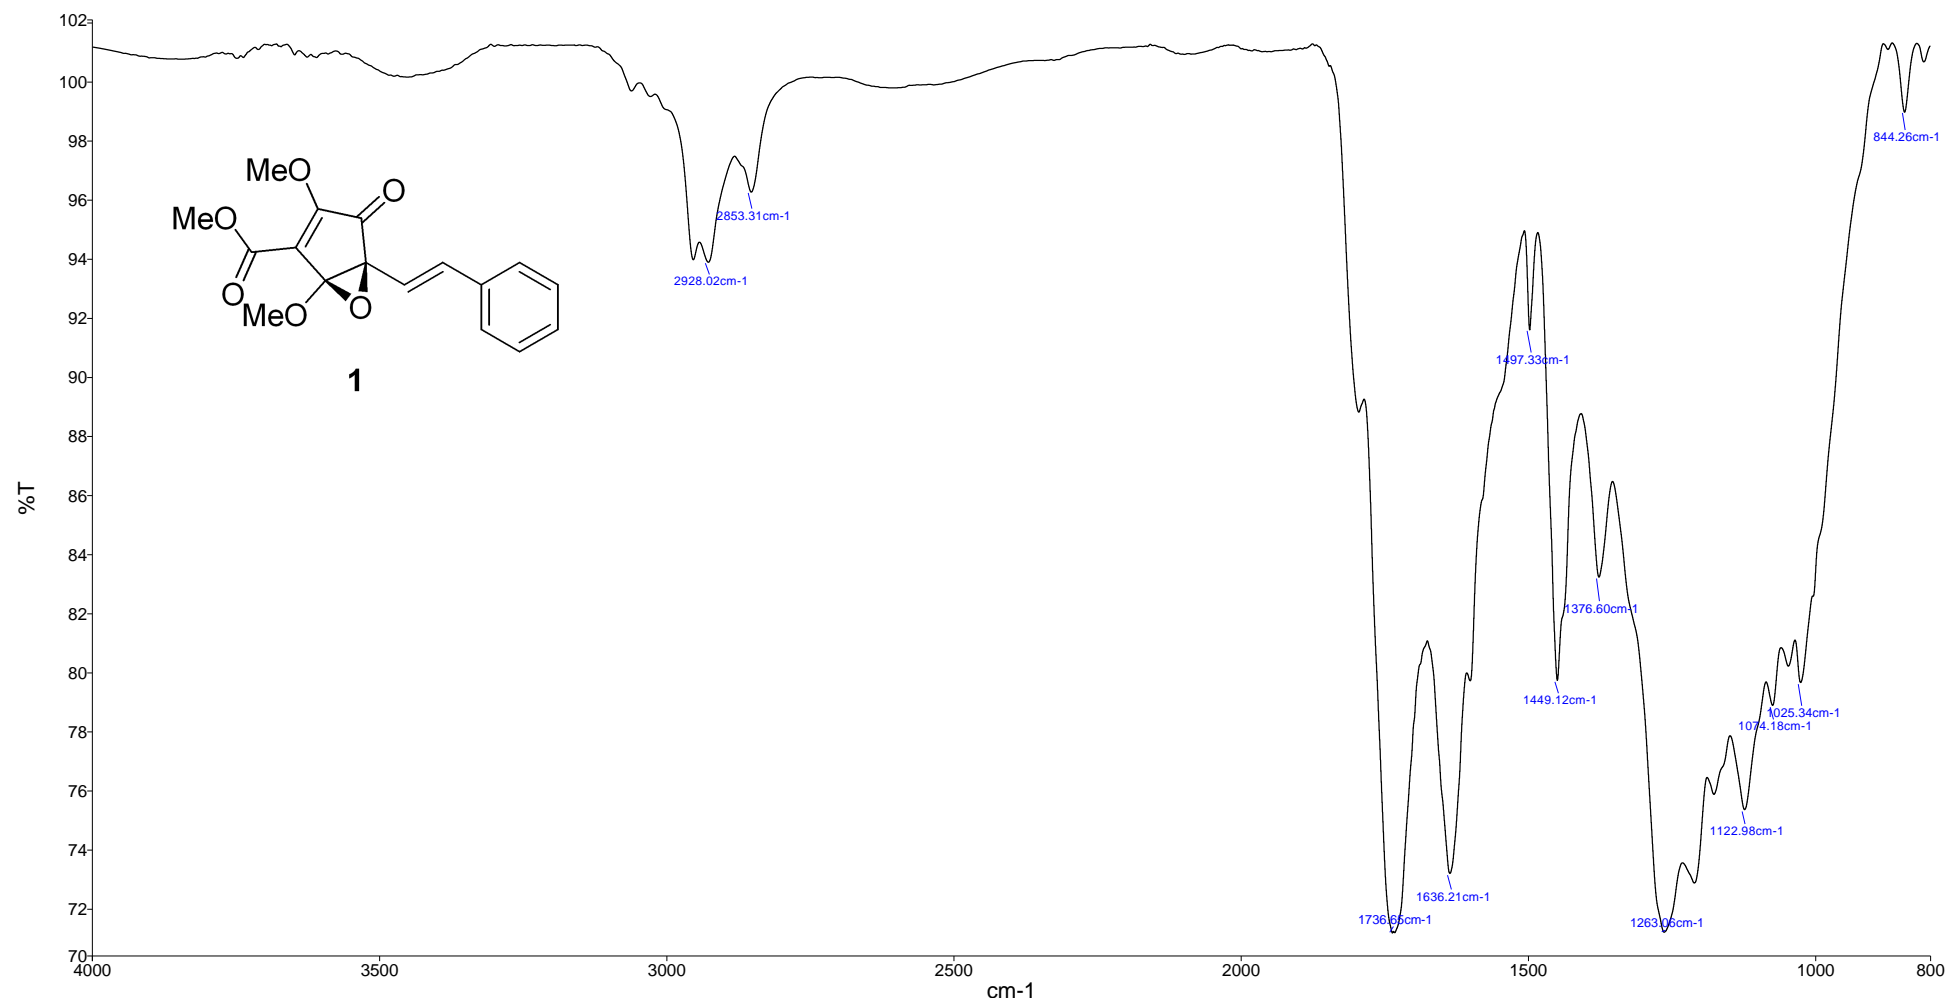

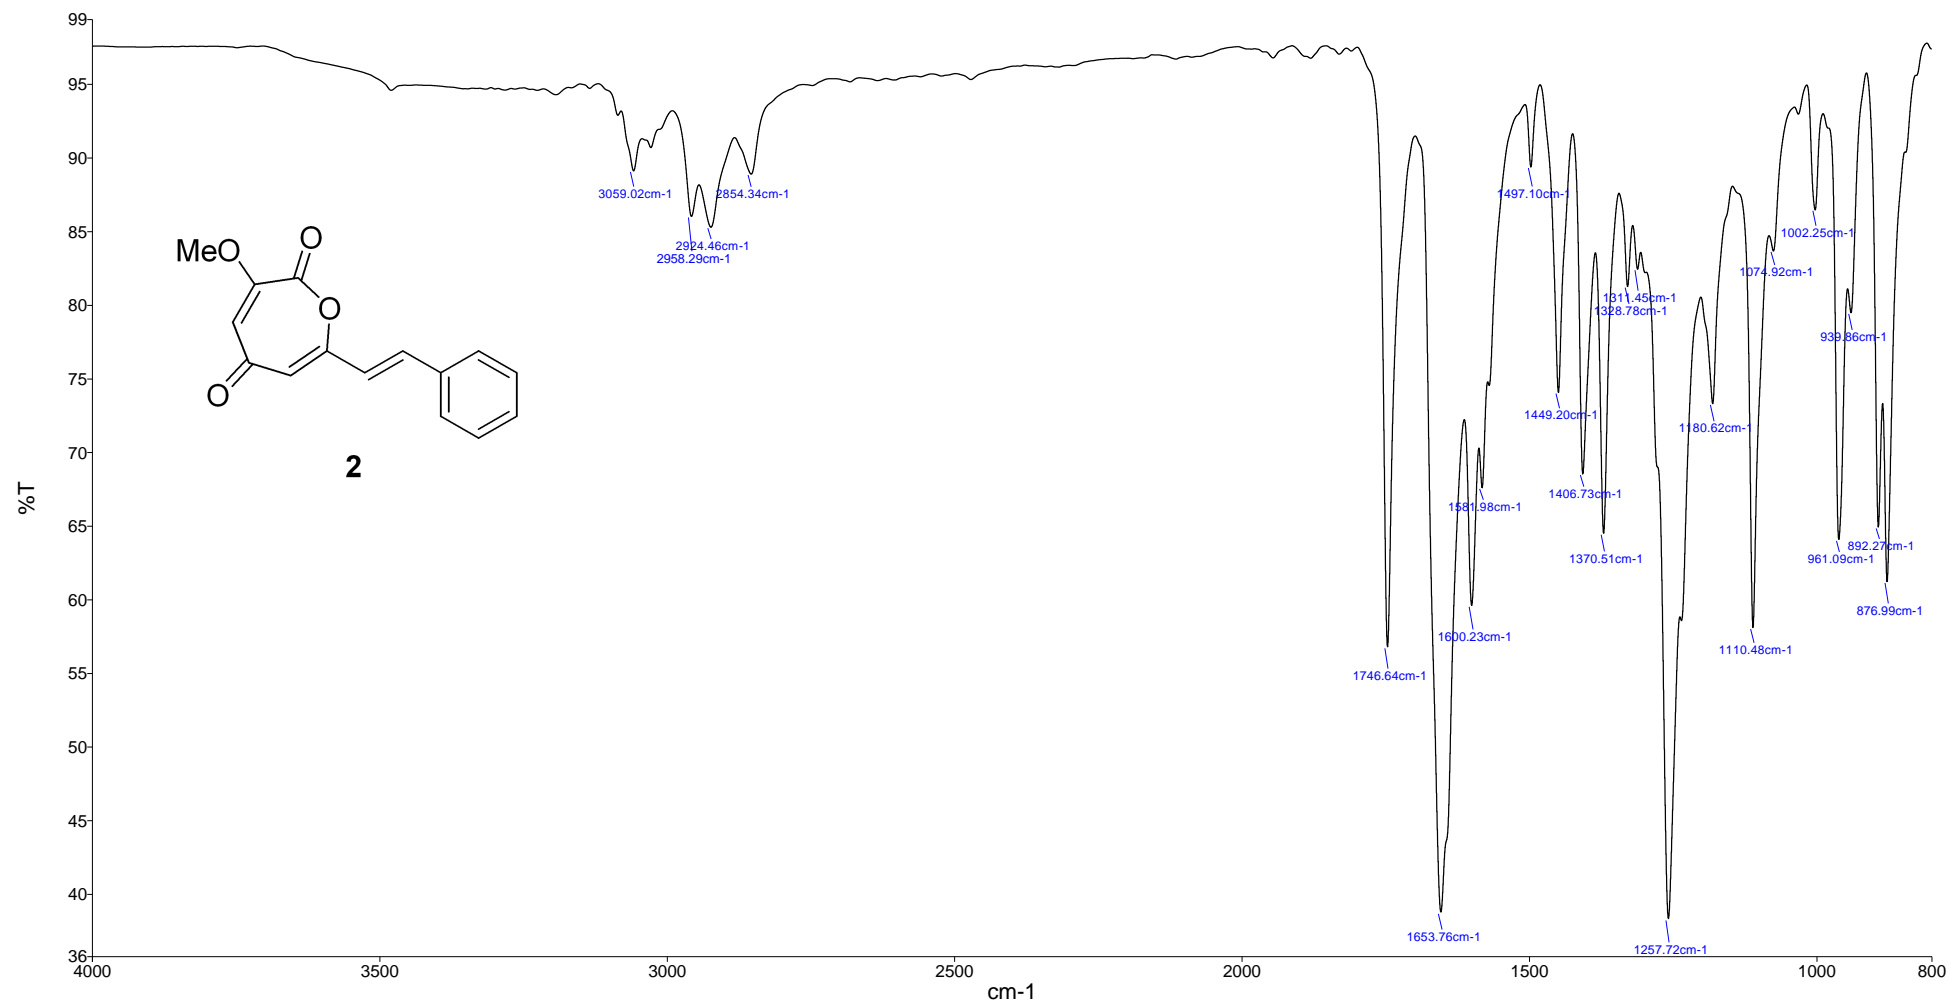



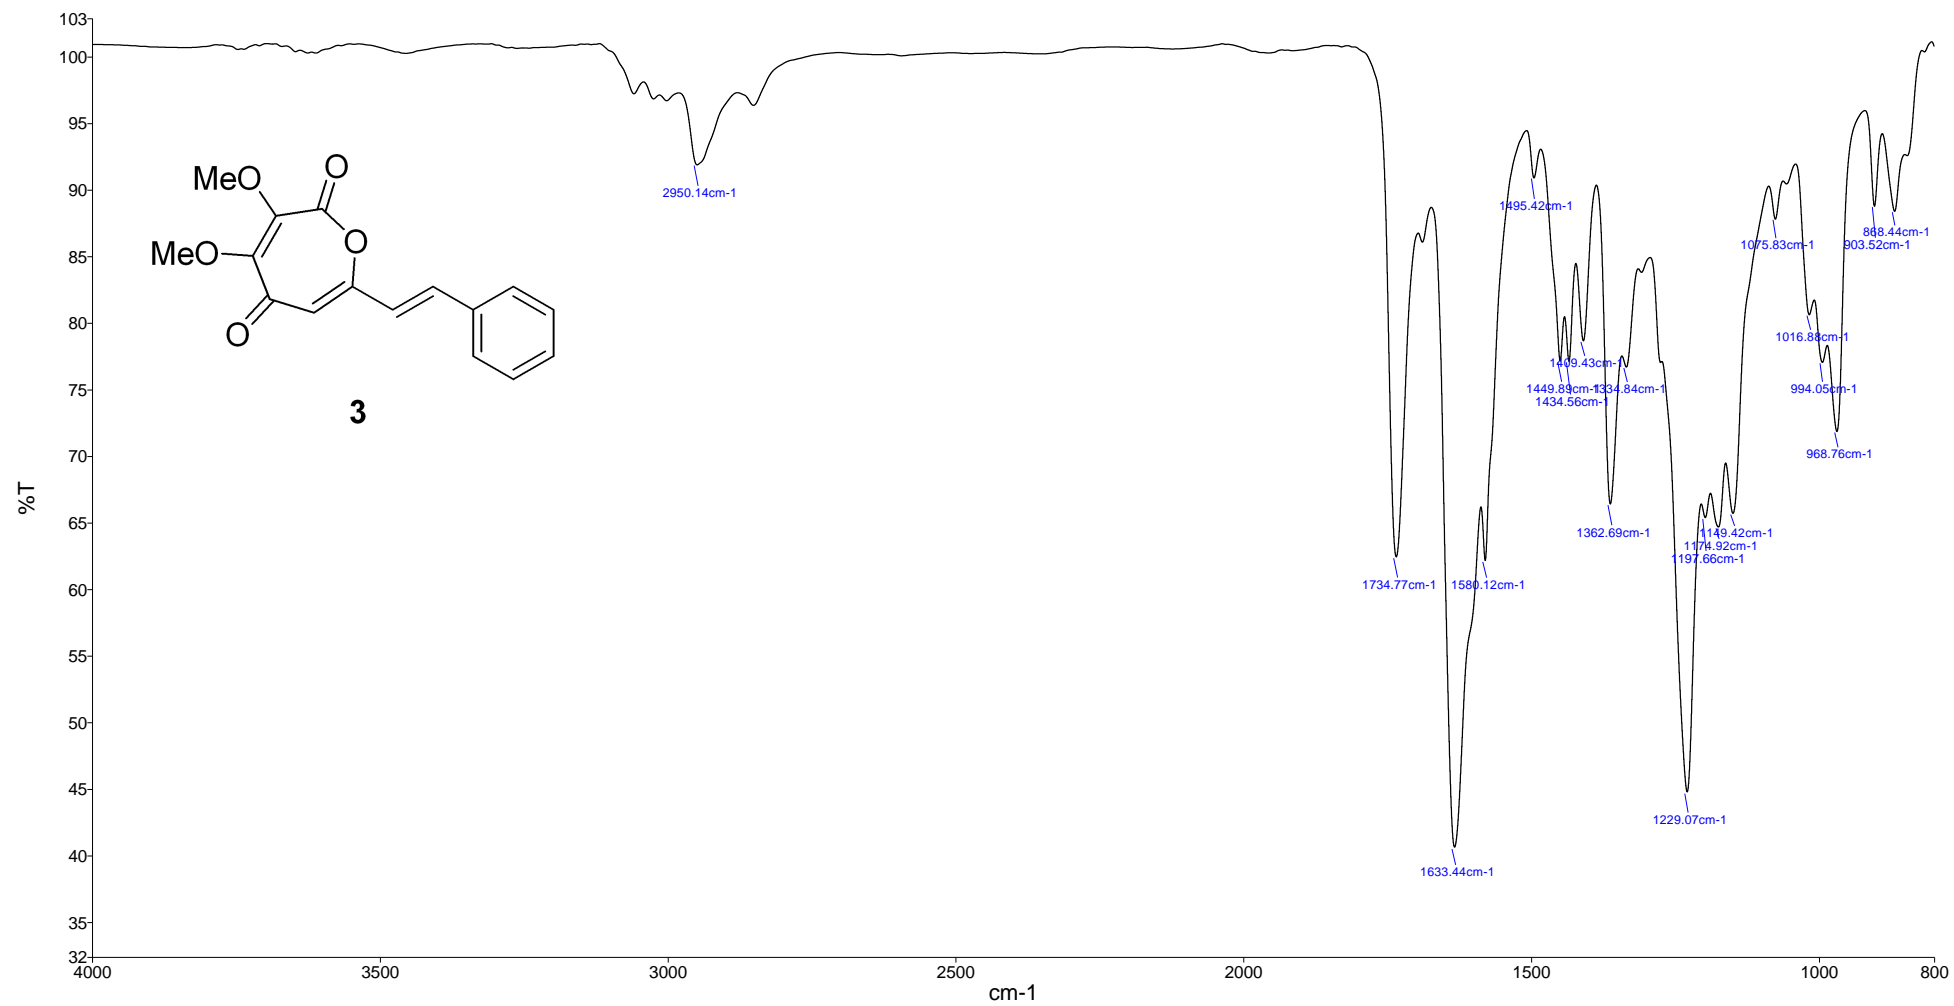

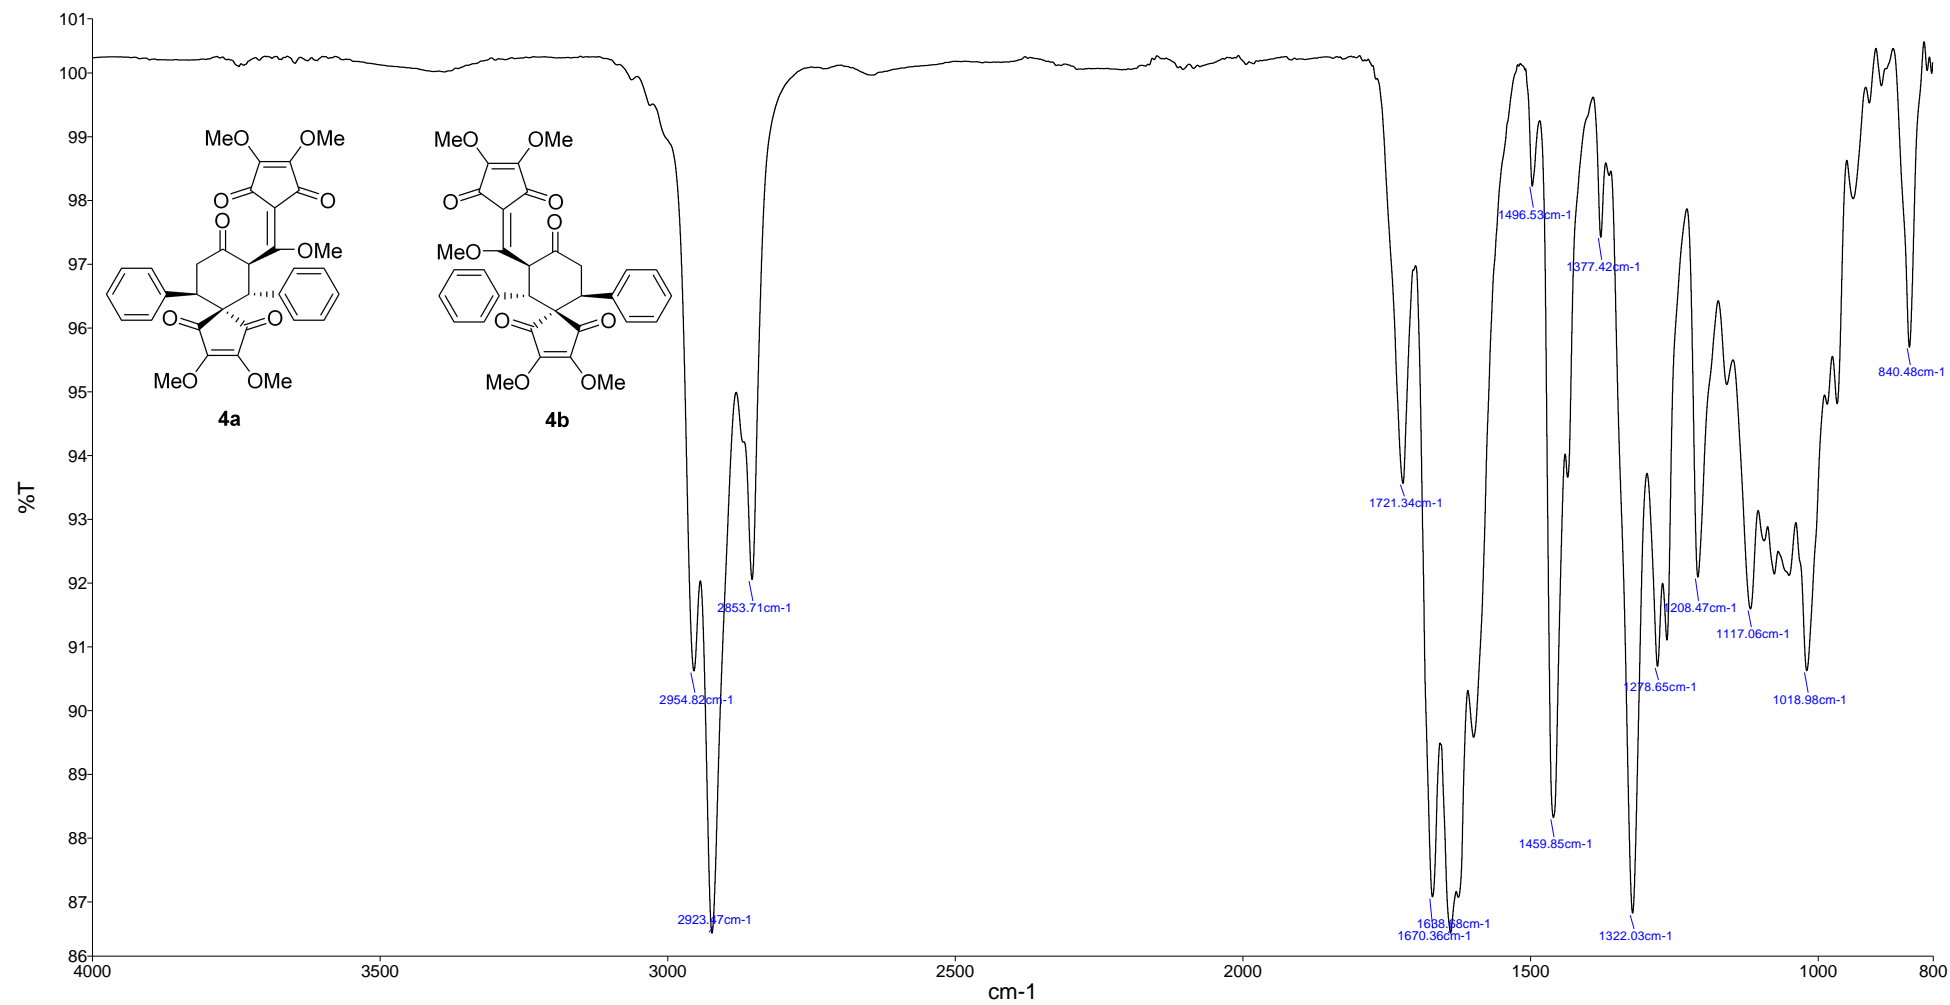

#### S4. ECD computational details.

In general, conformational analyses were carried out via random searching in the Sybyl-X 2.0 using the MMFF94S force field with an energy cutoff of 2.5 kcal/mol [1]. Due to the rigid skeleton and the limitations of NOESY correlations, the results showed only one lowest energy conformer for *RRR-4* whose relative energy within 2.5 kcal/mol. Subsequently, the conformer was re-optimized using DFT at the B3LYP/6-31+G(d) level in gas phase by the GAUSSIAN 09 program [2]. The energies, oscillator strengths, and rotational strengths (velocity) of the first 60 electronic excitations were calculated using the TDDFT methodology at the B3LYP/6-311++G(d,p) level in vacuum. The ECD spectra were simulated by the overlapping Gaussian function (half the bandwidth at 1/e peak height,  $\sigma = 0.22$  eV) [3]. Theoretical ECD spectrum of the corresponding enantiomer was obtained by directly inverse of the ECD spectrum of the calculated model molecule. By comparison of the calculated ECD spectra with the experimental ones, the absolute configuration of **4a** and **4b** was resolved.

[1]. Sybyl Software, version X 2.0; Tripos Associates Inc.: St. Louis, MO, 2013.

[2]. Frisch, M. J.; Trucks, G. W.; Schlegel, H. B.; Scuseria, G. E.; Robb, M. A.; Cheeseman, J. R.; Scalmani, G.; Barone, V.; Mennucci, B.; Petersson, G. A.; Nakatsuji, H.; Caricato, M.; Li, X.; Hratchian, H. P.; Izmaylov, A. F.; Bloino, J.; Zheng, G.; Sonnenberg, J. L.; Hada, M.; Ehara, M.; Toyota, K.; Fukuda, R.; Hasegawa, J.; Ishida, M.; Nakajima, T.; Honda, Y.; Kitao, O.; Nakai, H.; Vreven, T.; Montgomery, Jr., J. A.; Peralta, J. E.; Ogliaro, F.; Bearpark, M.; Heyd, J. J.; Brothers, E.; Kudin, K. N.; Staroverov, V. N.; Kobayashi, R.; Normand, J.; Raghavachari, K.; Rendell, A.; Burant, J. C.; Iyengar, S. S.; Tomasi, J.; Cossi, M.; Rega, N.; Millam, J. M.; Klene, M.; Knox, J. E.; Cross, J. B.; Bakken, V.; Adamo, C.; Jaramillo, J.; Gomperts, R.; Stratmann, R. E.; Yazyev, O.; Austin, A. J.; Cammi, R.; Pomelli, C.; Ochterski, J. W.; Martin, R. L.; Morokuma, K.; Zakrzewski, V. G.; Voth, G. A.; Salvador, P.; Dannenberg, J. J.; Dapprich, S.; Daniels, A. D.; Farkas, Ö.; Foresman, J. B.; Ortiz, J. V.; Cioslowski, J.; Fox, D. J. Gaussian 09, Rev. C 01; Gaussian, Inc., Wallingford CT, 2009.

[3]. Stephens, P. J.; Harada, N. ECD cotton effect approximated by the Gaussian curve and other methods. *Chirality* **2010**, *22*, 229–233.

**S4.1.** The stable conformer of 1C of *RRR-4*.

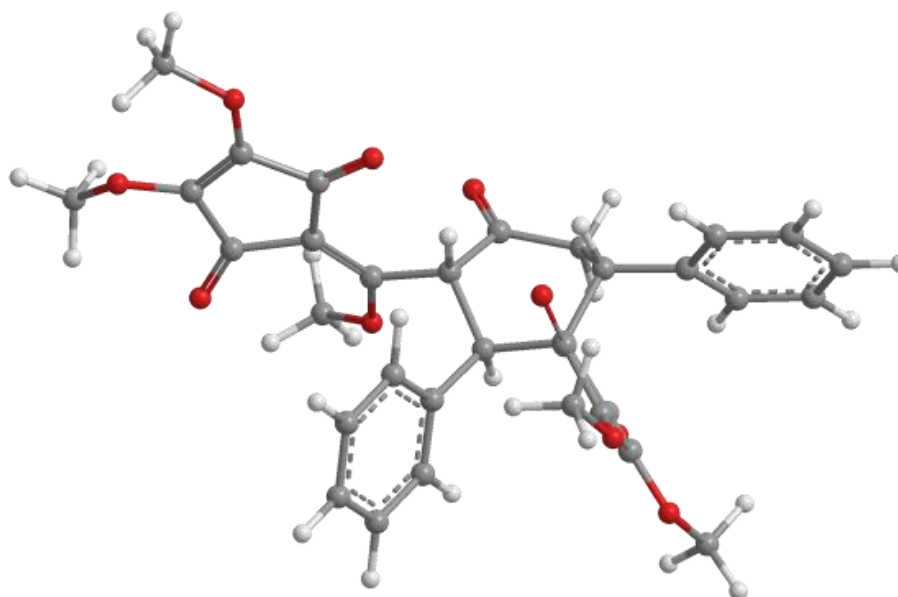

E(RB3LYP) -2028.25581948

**S4.2.** Important thermodynamic parameters (a.u.) of the optimized **4** at the B3LYP/6-31G(d) level in the gas phase.

| Conformer          | $E$          | $E'=E+ZPE$   | $H$          | $G$          |
|--------------------|--------------|--------------|--------------|--------------|
| 1C of <i>RRR-4</i> | -2027.157662 | -2027.198934 | -2027.156718 | -2027.277369 |

$E$ ,  $E'$ ,  $H$ ,  $G$ : total energy, total energy with zero point energy (ZPE), enthalpy, and Gibbs free

**S4.3.** Excitation energies, oscillator strengths, and rotatory strengths in the ECD spectra of 1C of *RRR-4*

| Excited State | Excitation Energies (eV) | Wavelength (nm) | Oscillator strengths | Rotatory strength* | Excited State | Excitation Energies (eV) | Wavelength (nm) | Oscillator strengths | Rotatory strength* |
|---------------|--------------------------|-----------------|----------------------|--------------------|---------------|--------------------------|-----------------|----------------------|--------------------|
| 1             | 3.2312                   | 383.71          | 0.0027               | 27.1267            | 31            | 4.7878                   | 258.96          | 0.0366               | -39.3049           |
| 2             | 3.2644                   | 379.80          | 0.0102               | -18.1247           | 32            | 4.8536                   | 255.45          | 0.0374               | -3.0563            |
| 3             | 3.2781                   | 378.22          | 0.0088               | -5.6629            | 33            | 4.8896                   | 253.57          | 0.1109               | 61.8589            |
| 4             | 3.4477                   | 359.62          | 0.0009               | 14.6460            | 34            | 4.9163                   | 252.19          | 0.0224               | 2.5333             |
| 5             | 3.5114                   | 353.09          | 0.0046               | -6.7515            | 35            | 5.0009                   | 247.92          | 0.0020               | 0.6639             |
| 6             | 3.5310                   | 351.13          | 0.0003               | -3.0062            | 36            | 5.0311                   | 246.44          | 0.0009               | -0.3798            |

|    |        |        |        |          |    |        |        |        |          |
|----|--------|--------|--------|----------|----|--------|--------|--------|----------|
| 7  | 3.7548 | 330.20 | 0.0689 | 17.4277  | 37 | 5.0398 | 246.01 | 0.0042 | -0.7537  |
| 8  | 3.7651 | 329.30 | 0.0301 | -17.0925 | 38 | 5.0616 | 244.95 | 0.0010 | -0.7110  |
| 9  | 3.8532 | 321.77 | 0.0221 | 7.3104   | 39 | 5.1105 | 242.61 | 0.0030 | 5.3365   |
| 10 | 3.9019 | 317.75 | 0.0035 | 2.3127   | 40 | 5.1267 | 241.84 | 0.0954 | 12.4478  |
| 11 | 3.9407 | 314.62 | 0.0018 | -2.1319  | 41 | 5.1651 | 240.04 | 0.0064 | 2.5326   |
| 12 | 3.9598 | 313.11 | 0.0011 | -0.5389  | 42 | 5.1955 | 238.64 | 0.0008 | -0.3363  |
| 13 | 3.9647 | 312.72 | 0.0047 | 4.1934   | 43 | 5.2292 | 237.10 | 0.0026 | 0.3520   |
| 14 | 4.0036 | 309.68 | 0.0031 | -0.4173  | 44 | 5.2477 | 236.27 | 0.0151 | 16.8677  |
| 15 | 4.0501 | 306.13 | 0.0057 | -5.4291  | 45 | 5.2657 | 235.45 | 0.0062 | 5.7470   |
| 16 | 4.1534 | 298.51 | 0.3281 | 10.7221  | 46 | 5.3035 | 233.78 | 0.0126 | 4.5481   |
| 17 | 4.2526 | 291.55 | 0.0108 | -25.9453 | 47 | 5.3083 | 233.56 | 0.0005 | -1.3998  |
| 18 | 4.2607 | 291.00 | 0.0645 | 20.3618  | 48 | 5.3412 | 232.13 | 0.0119 | -2.0134  |
| 19 | 4.3348 | 286.02 | 0.0100 | 33.2084  | 49 | 5.3559 | 231.49 | 0.0007 | 0.5973   |
| 20 | 4.3460 | 285.28 | 0.0016 | -1.5933  | 50 | 5.3760 | 230.62 | 0.0165 | -6.5530  |
| 21 | 4.3531 | 284.82 | 0.0043 | 0.1093   | 51 | 5.4073 | 229.29 | 0.0219 | -8.6573  |
| 22 | 4.3602 | 284.35 | 0.0049 | -9.6630  | 52 | 5.4368 | 228.05 | 0.0014 | -0.1521  |
| 23 | 4.4134 | 280.92 | 0.0038 | 0.3650   | 53 | 5.4551 | 227.28 | 0.0145 | -10.6730 |
| 24 | 4.4945 | 275.86 | 0.0003 | 0.0160   | 54 | 5.4669 | 226.79 | 0.0486 | -22.6383 |
| 25 | 4.5019 | 275.40 | 0.0004 | -0.0515  | 55 | 5.5011 | 225.38 | 0.0049 | 3.4005   |
| 26 | 4.5651 | 271.59 | 0.0033 | -0.8720  | 56 | 5.5168 | 224.74 | 0.0371 | 1.3825   |
| 27 | 4.5740 | 271.06 | 0.0053 | -1.2824  | 57 | 5.5329 | 224.08 | 0.0859 | 38.8532  |
| 28 | 4.6582 | 266.16 | 0.0005 | -0.1776  | 58 | 5.5495 | 223.42 | 0.0099 | -2.3337  |
| 29 | 4.7116 | 263.15 | 0.0010 | 2.3118   | 59 | 5.5699 | 222.60 | 0.0069 | -1.4135  |
| 30 | 4.7189 | 262.74 | 0.0034 | -0.3018  | 60 | 5.5905 | 221.78 | 0.0052 | -0.1310  |

\* R(velocity)  $10^{*-40}$  erg-esu-cm
